# Supplementary material for: Model-Based Meta-Analysis on the Efficacy of Biologics and Small Targeted Molecules for Crohn’s Disease
Source: Front Immunol. 2022 Mar 17;13:828219. doi: 10.3389/fimmu.2022.828219 (PMC8967940; doi:10.3389/fimmu.2022.828219)
Supplement: Supplementary file 1 [file DataSheet_1.xlsx]

## Sheet: CDAI150
trialNO	armNO	treatment	cdai150	FLAG	DOSE	Regimen	method	methodFlag	week	event	no	group.week	tp1	male	age	dur	smok	CDAI	CRP	IBDQ	group	CLASS
1	1	placebo	0.0416667	1	0			0	2	1	24	1 02	2	0.6	38.5	10.4		288	1.28	128	1	0
1	2	Infliximab	0.384615	2	350	5mg/kg_0w	iv	2	2	10	26	1 02	2	0.52	37	12.5		312	2.21	122	2	1
7	1	placebo	0.176471	1	0			0	2	30	170	7 02	2	0.529	35	2.4	35.3	287.2	1	122.1	5	0
7	2	Infliximab	0.366864	2	350	5mg/kg_0,2,6,14,22	iv	2	2	62	169	7 02	2	0.521	34	2.2	38.5	289.9	1	125.3	6	1
7	1	placebo	0.276471	1	0			0	6	47	170	7 06	5	0.529	35	2.4	35.3	287.2	1	122.1	5	0
7	2	Infliximab	0.52071	2	350	5mg/kg_0,2,6,14,22	iv	2	6	88	169	7 06	5	0.521	34	2.2	38.5	289.9	1	125.3	6	1
7	1	placebo	0.341176	1	0			0	10	58	170	7 1	7	0.529	35	2.4	35.3	287.2	1	122.1	5	0
7	2	Infliximab	0.597633	2	350	5mg/kg_0,2,6,14,22	iv	2	10	101	169	7 1	7	0.521	34	2.2	38.5	289.9	1	125.3	6	1
7	1	placebo	0.335294	1	0			0	18	57	170	7 18	11	0.529	35	2.4	35.3	287.2	1	122.1	5	0
7	2	Infliximab	0.60355	2	350	5mg/kg_0,2,6,14,22	iv	2	18	102	169	7 18	11	0.521	34	2.2	38.5	289.9	1	125.3	6	1
7	1	placebo	0.317647	1	0			0	26	54	170	7 26	14	0.529	35	2.4	35.3	287.2	1	122.1	5	0
7	2	Infliximab	0.60355	2	350	5mg/kg_0,2,6,14,22	iv	2	26	102	169	7 26	14	0.521	34	2.2	38.5	289.9	1	125.3	6	1
8	1	placebo	0.0833333	1	0			0	2	1	12	8 02	2	0.416	34.4	8.4		272	3.5	118	7	0
8	2	natalizumab	0.388889	3	210	3mg/kg_0	iv	2	2	7	18	8 02	2	0.389	36	8.5		258	1.4	121	8	2
9	1	placebo	0.0952381	1	0			0	2	6	63	9 02	2	0.48	34	8.9		300		130	9	0
9	2	natalizumab	0.147059	3	210	3mg/kg	iv	2	2	10	68	9 02	2	0.4	36	8.4		288		130	10	2
9	3	natalizumab	0.19697	3	210	3mg/kg_0,4	iv	2	2	13	66	9 02	2	0.45	36	8.1		300		136	11	2
9	4	natalizumab	0.117647	3	420	6mg/kg_0,4	iv	2	2	6	51	9 02	2	0.49	35	7.8		298		123	12	2
9	1	placebo	0.142857	1	0			0	4	9	63	9 04	4	0.48	34	8.9		300		130	9	0
9	2	natalizumab	0.308824	3	210	3mg/kg	iv	2	4	21	68	9 04	4	0.4	36	8.4		288		130	10	2
9	3	natalizumab	0.287879	3	210	3mg/kg_0,4	iv	2	4	19	66	9 04	4	0.45	36	8.1		300		136	11	2
9	4	natalizumab	0.294118	3	420	6mg/kg_0,4	iv	2	4	15	51	9 04	4	0.49	35	7.8		298		123	12	2
9	1	placebo	0.269841	1	0			0	6	17	63	9 06	5	0.48	34	8.9		300		130	9	0
9	3	natalizumab	0.439394	3	210	3mg/kg_0,4	iv	2	6	29	66	9 06	5	0.45	36	8.1		300		136	11	2
9	4	natalizumab	0.313725	3	420	6mg/kg_0,4	iv	2	6	16	51	9 06	5	0.49	35	7.8		298		123	12	2
9	1	placebo	0.15873	1	0			0	8	10	63	9 08	6	0.48	34	8.9		300		130	9	0
9	3	natalizumab	0.409091	3	210	3mg/kg_0,4	iv	2	8	27	66	9 08	6	0.45	36	8.1		300		136	11	2
9	4	natalizumab	0.431373	3	420	6mg/kg_0,4	iv	2	8	22	51	9 08	6	0.49	35	7.8		298		123	12	2
9	1	placebo	0.269841	1	0			0	12	17	63	9 12	8	0.48	34	8.9		300		130	9	0
9	3	natalizumab	0.424242	3	210	3mg/kg_0,4	iv	2	12	28	66	9 12	8	0.45	36	8.1		300		136	11	2
9	4	natalizumab	0.392157	3	420	6mg/kg_0,4	iv	2	12	20	51	9 12	8	0.49	35	7.8		298		123	12	2
10	1	placebo	0.0994475	1	0			0	2	18	181	10 02	2	0.4	39	9.167	24	303	2.3		13	0
10	2	natalizumab	0.139503	3	300	300mg_0,4,8	iv	2	2	101	724	10 02	2	0.43	38	10.083	23	302	2		14	2
10	1	placebo	0.187845	1	0			0	4	34	181	10 04	4	0.4	39	9.167	24	303	2.3		13	0
10	2	natalizumab	0.225138	3	300	300mg_0,4,8	iv	2	4	163	724	10 04	4	0.43	38	10.083	23	302	2		14	2
10	1	placebo	0.226519	1	0			0	6	41	181	10 06	5	0.4	39	9.167	24	303	2.3		13	0
10	2	natalizumab	0.327348	3	300	300mg_0,4,8	iv	2	6	237	724	10 06	5	0.43	38	10.083	23	302	2		14	2
10	1	placebo	0.281768	1	0			0	8	51	181	10 08	6	0.4	39	9.167	24	303	2.3		13	0
10	2	natalizumab	0.339779	3	300	300mg_0,4,8	iv	2	8	246	724	10 08	6	0.43	38	10.083	23	302	2		14	2
10	1	placebo	0.303867	1	0			0	10	55	181	10 1	7	0.4	39	9.167	24	303	2.3		13	0
10	2	natalizumab	0.368785	3	300	300mg_0,4,8	iv	2	10	267	724	10 1	7	0.43	38	10.083	23	302	2		14	2
10	1	placebo	0.309392	1	0			0	12	56	181	10 12	8	0.4	39	9.167	24	303	2.3		13	0
10	2	natalizumab	0.39779	3	300	300mg_0,4,8	iv	2	12	288	724	10 12	8	0.43	38	10.083	23	302	2		14	2
11	1	placebo	0.16	1	0			0	4	40	250	11 04	4	0.41	37.7	10.025	19	299.5	2.34	123.6	15	0
11	2	natalizumab	0.239382	3	300	300mg_0,4,8	iv	2	4	62	259	11 04	4	0.41	37.6	10.17	22	303.9	2.3	122.5	16	2
11	1	placebo	0.212	1	0			0	8	53	250	11 08	6	0.41	37.7	10.025	19	299.5	2.34	123.6	15	0
11	2	natalizumab	0.320463	3	300	300mg_0,4,8	iv	2	8	83	259	11 08	6	0.41	37.6	10.17	22	303.9	2.3	122.5	16	2
11	1	placebo	0.252	1	0			0	12	63	250	11 12	8	0.41	37.7	10.025	19	299.5	2.34	123.6	15	0
11	2	natalizumab	0.378378	3	300	300mg_0,4,8	iv	2	12	98	259	11 12	8	0.41	37.6	10.17	22	303.9	2.3	122.5	16	2
16	1	placebo	0.121212	1	0			0	2	16	132	16 02	2	0.326	37.7	8.4		300	0.75	124	19	0
16	2	CDP571	0.152091	4	700	10mg/kg_q8w_0-24w	iv	2	2	40	263	16 02	2	0.399	37.9	9.1		293	0.665	129	20	1
16	1	placebo	0.159091	1	0			0	4	21	132	16 04	4	0.326	37.7	8.4		300	0.75	124	19	0
16	2	CDP571	0.205323	4	700	10mg/kg_q8w_0-24w	iv	2	4	54	263	16 04	4	0.399	37.9	9.1		293	0.665	129	20	1
16	1	placebo	0.227273	1	0			0	8	30	132	16 08	6	0.326	37.7	8.4		300	0.75	124	19	0
16	2	CDP571	0.190114	4	700	10mg/kg_q8w_0-24w	iv	2	8	50	263	16 08	6	0.399	37.9	9.1		293	0.665	129	20	1
16	1	placebo	0.25	1	0			0	12	33	132	16 12	8	0.326	37.7	8.4		300	0.75	124	19	0
16	2	CDP571	0.250951	4	700	10mg/kg_q8w_0-24w	iv	2	12	66	263	16 12	8	0.399	37.9	9.1		293	0.665	129	20	1
16	1	placebo	0.189394	1	0			0	16	25	132	16 16	10	0.326	37.7	8.4		300	0.75	124	19	0
16	2	CDP571	0.231939	4	700	10mg/kg_q8w_0-24w	iv	2	16	61	263	16 16	10	0.399	37.9	9.1		293	0.665	129	20	1
16	1	placebo	0.212121	1	0			0	24	28	132	16 24	13	0.326	37.7	8.4		300	0.75	124	19	0
16	2	CDP571	0.228137	4	700	10mg/kg_q8w_0-24w	iv	2	24	60	263	16 24	13	0.399	37.9	9.1		293	0.665	129	20	1
16	1	placebo	0.204545	1	0			0	28	27	132	16 28	15	0.326	37.7	8.4		300	0.75	124	19	0
16	2	CDP571	0.235741	4	700	10mg/kg_q8w_0-24w	iv	2	28	62	263	16 28	15	0.399	37.9	9.1		293	0.665	129	20	1
17	1	placebo	0.15	1	0			0	2	3	20	17 02	2	0.5	39.3			266.1		121.4	21	0
17	2	etanercept	0.0869565	5	25	25mg_biw_8w	sc	1	2	2	23	17 02	2	0.696	37.4			299.5		124.4	22	1
17	1	placebo	0.2	1	0			0	4	4	20	17 04	4	0.5	39.3			266.1		121.4	21	0
17	2	etanercept	0.0869565	5	25	25mg_biw_8w	sc	1	4	2	23	17 04	4	0.696	37.4			299.5		124.4	22	1
17	1	placebo	0.25	1	0			0	8	5	20	17 08	6	0.5	39.3			266.1		121.4	21	0
17	2	etanercept	0.130435	5	25	25mg_biw_8w	sc	1	8	3	23	17 08	6	0.696	37.4			299.5		124.4	22	1
20	1	placebo	0.03125	1	0			0	2	1	32	20 02	2	0.813	30.6						27	0
20	2	certolizumab	0.2	6	200	200mg_q2w_0-4w	sc	1	2	6	30	20 02	2	0.833	32.7						28	1
20	3	certolizumab	0.16129	6	400	400mg_q2w_0-4w	sc	1	2	5	31	20 02	2	0.688	31.4						29	1
20	1	placebo	0.0625	1	0			0	4	2	32	20 04	4	0.813	30.6						27	0
20	2	certolizumab	0.266667	6	200	200mg_q2w_0-4w	sc	1	4	8	30	20 04	4	0.833	32.7						28	1
20	3	certolizumab	0.225806	6	400	400mg_q2w_0-4w	sc	1	4	7	31	20 04	4	0.688	31.4						29	1
20	1	placebo	0.15625	1	0			0	6	5	32	20 06	5	0.813	30.6						27	0
20	2	certolizumab	0.266667	6	200	200mg_q2w_0-4w	sc	1	6	8	30	20 06	5	0.833	32.7						28	1
20	3	certolizumab	0.322581	6	400	400mg_q2w_0-4w	sc	1	6	10	31	20 06	5	0.688	31.4						29	1
21	1	placebo	0.0958904	1	0			0	2	7	73	21 02	2	0.329	35.8	7.95				122.9	30	0
21	2	certolizumab	0.162162	6	100	100mg_q4w_0-8w	sc	1	2	12	74	21 02	2	0.473	33.5	7.73				132.2	31	1
21	3	certolizumab	0.111111	6	200	200mg_q4w_0-8w	sc	1	2	8	72	21 02	2	0.306	40.1	8.84				122.9	32	1
21	4	certolizumab	0.180556	6	400	400mg_q4w_0-8w	sc	1	2	13	72	21 02	2	0.404	35.9	8.43				126.5	33	1
21	1	placebo	0.0821918	1	0			0	4	6	73	21 04	4	0.329	35.8	7.95				122.9	30	0
21	2	certolizumab	0.22973	6	100	100mg_q4w_0-8w	sc	1	4	17	74	21 04	4	0.473	33.5	7.73				132.2	31	1
21	3	certolizumab	0.208333	6	200	200mg_q4w_0-8w	sc	1	4	15	72	21 04	4	0.306	40.1	8.84				122.9	32	1
21	4	certolizumab	0.222222	6	400	400mg_q4w_0-8w	sc	1	4	16	72	21 04	4	0.404	35.9	8.43				126.5	33	1
21	1	placebo	0.136986	1	0			0	6	10	73	21 06	5	0.329	35.8	7.95				122.9	30	0
21	2	certolizumab	0.256757	6	100	100mg_q4w_0-8w	sc	1	6	19	74	21 06	5	0.473	33.5	7.73				132.2	31	1
21	3	certolizumab	0.0833333	6	200	200mg_q4w_0-8w	sc	1	6	6	72	21 06	5	0.306	40.1	8.84				122.9	32	1
21	4	certolizumab	0.277778	6	400	400mg_q4w_0-8w	sc	1	6	20	72	21 06	5	0.404	35.9	8.43				126.5	33	1
21	1	placebo	0.123288	1	0			0	8	9	73	21 08	6	0.329	35.8	7.95				122.9	30	0
21	2	certolizumab	0.297297	6	100	100mg_q4w_0-8w	sc	1	8	22	74	21 08	6	0.473	33.5	7.73				132.2	31	1
21	3	certolizumab	0.208333	6	200	200mg_q4w_0-8w	sc	1	8	15	72	21 08	6	0.306	40.1	8.84				122.9	32	1
21	4	certolizumab	0.305556	6	400	400mg_q4w_0-8w	sc	1	8	22	72	21 08	6	0.404	35.9	8.43				126.5	33	1
21	1	placebo	0.219178	1	0			0	10	16	73	21 1	7	0.329	35.8	7.95				122.9	30	0
21	2	certolizumab	0.283784	6	100	100mg_q4w_0-8w	sc	1	10	21	74	21 1	7	0.473	33.5	7.73				132.2	31	1
21	3	certolizumab	0.194444	6	200	200mg_q4w_0-8w	sc	1	10	14	72	21 1	7	0.306	40.1	8.84				122.9	32	1
21	4	certolizumab	0.347222	6	400	400mg_q4w_0-8w	sc	1	10	25	72	21 1	7	0.404	35.9	8.43				126.5	33	1
21	1	placebo	0.232877	1	0			0	12	17	73	21 12	8	0.329	35.8	7.95				122.9	30	0
21	2	certolizumab	0.27027	6	100	100mg_q4w_0-8w	sc	1	12	20	74	21 12	8	0.473	33.5	7.73				132.2	31	1
21	3	certolizumab	0.194444	6	200	200mg_q4w_0-8w	sc	1	12	14	72	21 12	8	0.306	40.1	8.84				122.9	32	1
21	4	certolizumab	0.263889	6	400	400mg_q4w_0-8w	sc	1	12	19	72	21 12	8	0.404	35.9	8.43				126.5	33	1
22	1	placebo	0.157895	1	0			0	2	33	209	22 02	2	0.4186	38.8	7		293	0.922	122.1	34	0
22	2	certolizumab	0.232558	6	400	400mg_q2w_0-4w	sc	1	2	50	215	22 02	2	0.47085	36.3	7.5		293	0.933	126.5	35	1
22	1	placebo	0.191388	1	0			0	4	40	209	22 04	4	0.4186	38.8	7		293	0.922	122.1	34	0
22	2	certolizumab	0.265116	6	400	400mg_q2w_0-4w	sc	1	4	57	215	22 04	4	0.47085	36.3	7.5		293	0.933	126.5	35	1
22	1	placebo	0.253589	1	0			0	6	53	209	22 06	5	0.4186	38.8	7		293	0.922	122.1	34	0
22	2	certolizumab	0.316279	6	400	400mg_q2w_0-4w	sc	1	6	68	215	22 06	5	0.47085	36.3	7.5		293	0.933	126.5	35	1
23	1	placebo	0.0792683	1	0			0	2	26	328	23 02	2	0.399	38	8	33	284.3	0.902		36	0
23	2	certolizumab	0.129909	6	400	400mg_0,2,4,q4w_8-26w	sc	1	2	43	331	23 02	2	0.4743	37	7	31	284.7	0.82		37	1
23	1	placebo	0.109756	1	0			0	4	36	328	23 04	4	0.399	38	8	33	284.3	0.902		36	0
23	2	certolizumab	0.190332	6	400	400mg_0,2,4,q4w_8-26w	sc	1	4	63	331	23 04	4	0.4743	37	7	31	284.7	0.82		37	1
23	1	placebo	0.170732	1	0			0	6	56	328	23 06	5	0.399	38	8	33	284.3	0.902		36	0
23	2	certolizumab	0.220544	6	400	400mg_0,2,4,q4w_8-26w	sc	1	6	73	331	23 06	5	0.4743	37	7	31	284.7	0.82		37	1
23	1	placebo	0.189024	1	0			0	8	62	328	23 08	6	0.399	38	8	33	284.3	0.902		36	0
23	2	certolizumab	0.238671	6	400	400mg_0,2,4,q4w_8-26w	sc	1	8	79	331	23 08	6	0.4743	37	7	31	284.7	0.82		37	1
23	1	placebo	0.20122	1	0			0	12	66	328	23 12	8	0.399	38	8	33	284.3	0.902		36	0
23	2	certolizumab	0.268882	6	400	400mg_0,2,4,q4w_8-26w	sc	1	12	89	331	23 12	8	0.4743	37	7	31	284.7	0.82		37	1
23	1	placebo	0.20122	1	0			0	16	66	328	23 16	10	0.399	38	8	33	284.3	0.902		36	0
23	2	certolizumab	0.259819	6	400	400mg_0,2,4,q4w_8-26w	sc	1	16	86	331	23 16	10	0.4743	37	7	31	284.7	0.82		37	1
23	1	placebo	0.189024	1	0			0	20	62	328	23 2	12	0.399	38	8	33	284.3	0.902		36	0
23	2	certolizumab	0.229607	6	400	400mg_0,2,4,q4w_8-26w	sc	1	20	76	331	23 2	12	0.4743	37	7	31	284.7	0.82		37	1
23	1	placebo	0.179878	1	0			0	24	59	328	23 24	13	0.399	38	8	33	284.3	0.902		36	0
23	2	certolizumab	0.259819	6	400	400mg_0,2,4,q4w_8-26w	sc	1	24	86	331	23 24	13	0.4743	37	7	31	284.7	0.82		37	1
23	1	placebo	0.179878	1	0			0	26	59	328	23 26	14	0.399	38	8	33	284.3	0.902		36	0
23	2	certolizumab	0.29003	6	400	400mg_0,2,4,q4w_8-26w	sc	1	26	96	331	23 26	14	0.4743	37	7	31	284.7	0.82		37	1
26	1	placebo	0.0675676	1	0			0	1	5	74	26 01	1	0.527027	37		38	295.7	0.9	126.9	38	0
26	2	adalimumab	0.162162	7	40	40mg_0 20mg_2	sc	1	1	12	74	26 01	1	0.527027	39		34	298	0.9	129.9	39	1
26	3	adalimumab	0.133333	7	80	80mg_0 40mg_2	sc	1	1	10	75	26 01	1	0.333333	38		43	300.7	0.9	126.9	40	1
26	4	adalimumab	0.157895	7	160	160mg_0 80mg_2	sc	1	1	12	76	26 01	1	0.473684	39		42	295.4	0.7	125.1	41	1
26	1	placebo	0.135135	1	0			0	2	10	74	26 02	2	0.333333	37		38	295.7	0.9	126.9	38	0
26	2	adalimumab	0.135135	7	40	40mg_0 20mg_2	sc	1	2	10	74	26 02	2	0.333333	39		34	298	0.9	129.9	39	1
26	3	adalimumab	0.2	7	80	80mg_0 40mg_2	sc	1	2	15	75	26 02	2	0.473684	38		43	300.7	0.9	126.9	40	1
26	4	adalimumab	0.236842	7	160	160mg_0 80mg_2	sc	1	2	18	76	26 02	2	0.527027	39		42	295.4	0.7	125.1	41	1
26	1	placebo	0.121622	1	0			0	4	9	74	26 04	4	0.473684	37		38	295.7	0.9	126.9	38	0
26	2	adalimumab	0.175676	7	40	40mg_0 20mg_2	sc	1	4	13	74	26 04	4	0.473684	39		34	298	0.9	129.9	39	1
26	3	adalimumab	0.24	7	80	80mg_0 40mg_2	sc	1	4	18	75	26 04	4	0.527027	38		43	300.7	0.9	126.9	40	1
26	4	adalimumab	0.355263	7	160	160mg_0 80mg_2	sc	1	4	27	76	26 04	4	0.333333	39		42	295.4	0.7	125.1	41	1
28	1	placebo	0.0434783	1	0			0	2	1	23	28 02	2	0.695652	30.4	7.9	26.1	308.1	2.5	139.4	42	0
28	2	adalimumab	0.147059	7	80	80mg_0 40mg_2	sc	1	2	5	34	28 02	2	0.470588	30.6	9.2	44.1	302.7	3	148.6	43	1
28	3	adalimumab	0.181818	7	160	160mg_0 80mg_2	sc	1	2	6	33	28 02	2	0.606061	32	11	33.3	300.5	2.2	145.9	44	1
28	1	placebo	0.130435	1	0			0	4	3	23	28 04	4	0.695652	30.4	7.9	26.1	308.1	2.5	139.4	42	0
28	2	adalimumab	0.176471	7	80	80mg_0 40mg_2	sc	1	4	6	34	28 04	4	0.470588	30.6	9.2	44.1	302.7	3	148.6	43	1
28	3	adalimumab	0.333333	7	160	160mg_0 80mg_2	sc	1	4	11	33	28 04	4	0.606061	32	11	33.3	300.5	2.2	145.9	44	1
29	1	placebo	0.0361446	1	0			0	1	6	166	29 01	1	0.470588	30.6	9.2	44.1	302.7	3	148.6	45	0
29	2	adalimumab	0.0628931	7	160	160mg_0 80mg_2	sc	1	1	10	159	29 01	1	0.606061	32	11	33.3	300.5	2.2	145.9	46	1
29	1	placebo	0.060241	1	0			0	2	10	166	29 02	2	0.606061	32	11	33.3	300.5	2.2	145.9	45	0
29	2	adalimumab	0.213836	7	160	160mg_0 80mg_2	sc	1	2	34	159	29 02	2	0.695652	30.4	7.9	26.1	308.1	2.5	139.4	46	1
29	1	placebo	0.0722892	1	0			0	4	12	166	29 04	4	0.695652	30.4	7.9	26.1	308.1	2.5	139.4	45	0
29	2	adalimumab	0.213836	7	160	160mg_0 80mg_2	sc	1	4	34	159	29 04	4	0.470588	30.6	9.2	44.1	302.7	3	148.6	46	1
31	1	placebo	0.0776699	1	0			0	2	8	103	31 02	2	0.709	32.6			274.71	2.712		47	0
31	2	adalimumab	0.264706	7	160	160mg_0 80mg_2 40mg_4	sc	1	2	27	102	31 02	2	0.657	33.2			272.05	2.393		48	1
31	1	placebo	0.0686275	1	0			0	4	7	102	31 04	4	0.709	32.6			274.71	2.712		47	0
31	2	adalimumab	0.372549	7	160	160mg_0 80mg_2 40mg_4	sc	1	4	38	102	31 04	4	0.657	33.2			272.05	2.393		48	1
32	1	placebo	0.236842	1	0			0	8	9	38	32 08	6	0.578947	39.1	12.53		311.1	1.71		49	0
32	2	onercept	0.295455	8	10	10mg_tiw_0-8w	sc	1	8	13	44	32 08	6	0.340909	34	7.79		302.7	1.83		50	1
32	3	onercept	0.142857	8	25	25mg_tiw_0-8w	sc	1	8	6	42	32 08	6	0.5	35.7	12.19		327.3	1.82		51	1
32	4	onercept	0.3	8	35	35mg_tiw_0-8w	sc	1	8	12	40	32 08	6	0.425	39.2	10.43		325	2.44		52	1
32	5	onercept	0.209302	8	50	50mg_tiw_0-8w	sc	1	8	9	43	32 08	6	0.418605	35.6	9.37		312.2	2.29		53	1
33	1	placebo	0.0344828	1	0			0	1	2	58	33 01	1	0.517	34.5	9.08	32.8	288	2.5	122	54	0
33	2	vedolizumab	0.0645161	9	35	0.5mg/kg_0,4w	iv	2	1	4	62	33 01	1	0.403	36	8.75	46.8	288	1.96	131	55	2
33	3	vedolizumab	0.0923077	9	140	2.0mg/kg_0,4w	iv	2	1	6	65	33 01	1	0.477	38.5	8	41.5	297	2.46	131	56	2
33	1	placebo	0.0517241	1	0			0	2	3	58	33 02	2	0.517	34.5	9.08	32.8	288	2.5	122	54	0
33	2	vedolizumab	0.145161	9	35	0.5mg/kg_0,4w	iv	2	2	9	62	33 02	2	0.403	36	8.75	46.8	288	1.96	131	55	2
33	3	vedolizumab	0.230769	9	140	2.0mg/kg_0,4w	iv	2	2	15	65	33 02	2	0.477	38.5	8	41.5	297	2.46	131	56	2
33	1	placebo	0.12069	1	0			0	4	7	58	33 04	4	0.517	34.5	9.08	32.8	288	2.5	122	54	0
33	2	vedolizumab	0.209677	9	35	0.5mg/kg_0,4w	iv	2	4	13	62	33 04	4	0.403	36	8.75	46.8	288	1.96	131	55	2
33	3	vedolizumab	0.276923	9	140	2.0mg/kg_0,4w	iv	2	4	18	65	33 04	4	0.477	38.5	8	41.5	297	2.46	131	56	2
33	1	placebo	0.206897	1	0			0	6	12	58	33 06	5	0.517	34.5	9.08	32.8	288	2.5	122	54	0
33	2	vedolizumab	0.290323	9	35	0.5mg/kg_0,4w	iv	2	6	18	62	33 06	5	0.403	36	8.75	46.8	288	1.96	131	55	2
33	3	vedolizumab	0.292308	9	140	2.0mg/kg_0,4w	iv	2	6	19	65	33 06	5	0.477	38.5	8	41.5	297	2.46	131	56	2
33	1	placebo	0.206897	1	0			0	8	12	58	33 08	6	0.517	34.5	9.08	32.8	288	2.5	122	54	0
33	2	vedolizumab	0.306452	9	35	0.5mg/kg_0,4w	iv	2	8	19	62	33 08	6	0.403	36	8.75	46.8	288	1.96	131	55	2
33	3	vedolizumab	0.369231	9	140	2.0mg/kg_0,4w	iv	2	8	24	65	33 08	6	0.477	38.5	8	41.5	297	2.46	131	56	2
34	1	placebo	0.0675676	1	0			0	6	10	148	34 06	5	0.46622	38.6	8.2	23	325	2.713		57	0
34	2	vedolizumab	0.145455	9	300	300mg_0,2	iv	2	6	32	220	34 06	5	0.47727	36.3	9.2	24.5	327	2.874		58	2
35	1	placebo	0.120773	1	0			0	6	25	207	35 06	5	0.46622	38.6	8.2	23	325	2.713		59	0
35	2	vedolizumab	0.191388	9	300	300mg_0,2,6	iv	2	6	40	209	35 06	5	0.47727	36.3	9.2	24.5	327	2.874		60	2
35	1	placebo	0.130435	1	0			0	10	27	207	35 1	7	0.46622	38.6	8.2	23	325	2.713		59	0
35	2	vedolizumab	0.287081	9	300	300mg_0,2,6	iv	2	10	60	209	35 1	7	0.47727	36.3	9.2	24.5	327	2.874		60	2
36	1	placebo	0.102564	1	0			0	10	8	78	36 1	7	0.52	32.6	8.35	14.1	295	2.848		61	0
36	2	vedolizumab	0.177215	9	300	300mg_0,2,6	iv	2	10	14	79	36 1	7	0.51	33.9	7.2	16.5	303.9	2.234		62	2
37	1	placebo	0.115385	1	0			0	2	3	26	37 02	2	0.576923	37	13	27	292	1.2		63	0
37	2	ustekinumab	0.24	10	90	90mg_qw_0-3w	sc	1	2	6	25	37 02	2	0.6	37	12	40	311	1.7		64	3
37	1	placebo	0.153846	1	0			0	4	4	26	37 04	4	0.576923	37	13	27	292	1.2		63	0
37	2	ustekinumab	0.24	10	90	90mg_qw_0-3w	sc	1	4	6	25	37 04	4	0.6	37	12	40	311	1.7		64	3
37	1	placebo	0.230769	1	0			0	6	6	26	37 06	5	0.576923	37	13	27	292	1.2		63	0
37	2	ustekinumab	0.28	10	90	90mg_qw_0-3w	sc	1	6	7	25	37 06	5	0.6	37	12	40	311	1.7		64	3
37	1	placebo	0.230769	1	0			0	8	6	26	37 08	6	0.576923	37	13	27	292	1.2		63	0
37	2	ustekinumab	0.24	10	90	90mg_qw_0-3w	sc	1	8	6	25	37 08	6	0.6	37	12	40	311	1.7		64	3
42	1	placebo	0.136986	1	0			0	4	10	73	42 04	4	0.410959	42.6	11.52	28.8	305			75	0
42	2	apilimod	0.136986	11	50	50mg_qd_6w	po	3	4	10	73	42 04	4	0.369863	40.6	10.82	35.6	304			76	3
42	3	apilimod	0.175676	11	100	100mg_qd_6w	po	3	4	13	74	42 04	4	0.405405	41.4	11.35	33.8	300			77	3
42	1	placebo	0.191781	1	0			0	6	14	73	42 06	5	0.410959	42.6	11.52	28.8	305			75	0
42	2	apilimod	0.109589	11	50	50mg_qd_6w	po	3	6	8	73	42 06	5	0.369863	40.6	10.82	35.6	304			76	3
42	3	apilimod	0.148649	11	100	100mg_qd_6w	po	3	6	11	74	42 06	5	0.405405	41.4	11.35	33.8	300			77	3
42	1	placebo	0.4	1	0			0	24	10	25	42 24	13	0.410959	42.6	11.52	28.8	305			75	0
42	2	apilimod	0.411765	11	50	50mg_qd_6w	po	3	24	7	17	42 24	13	0.369863	40.6	10.82	35.6	304			76	3
42	3	apilimod	0.37037	11	100	100mg_qd_6w	po	3	24	10	27	42 24	13	0.405405	41.4	11.35	33.8	300			77	3
43	1	placebo	0.214286	1	0			0	8	6	28	43 08	6	0.464286	38	12.4	14.3	298	2.203		78	0
43	2	andecaliximab	0.207547	12	75	150mg_q2w_8w	sc	1	8	11	53	43 08	6	0.528302	38	12.7	20.8	320	1.938		79	4
43	3	andecaliximab	0.169811	12	150	150mg_qw_8w	sc	1	8	9	53	43 08	6	0.471698	39	11.4	20.8	335	2.655		80	4
43	4	andecaliximab	0.113208	12	300	300mg_qw_8w	sc	1	8	6	53	43 08	6	0.584906	42	12.6	22.6	329	1.749		81	4
44	1	placebo	0.21875	1	0			0	4	7	32	44 04	4	0.352941	35.7	8.2	29.4	306.4	1.71		82	0
44	2	tofacitinib	0.314286	13	1	1mg_bid_4w	po	3	4	11	35	44 04	4	0.694444	38.6	11.1	22.2	300.3	1.83		83	5
44	3	tofacitinib	0.266667	13	5	5mg_bid_4w	po	3	4	8	30	44 04	4	0.411765	38.7	10.9	32.4	297.7	1.75		84	5
44	4	tofacitinib	0.151515	13	15	15mg_bid_4w	po	3	4	5	33	44 04	4	0.514286	38.1	11.2	22.9	308	2.61		85	5
45	1	placebo	0.1	1	0			0	2	9	90	45 02	2	0.340659	37.2	10.8		313	0.55		86	0
45	2	tofacitinib	0.0941176	13	5	5mg_bid_8w	po	3	2	8	85	45 02	2	0.627907	40.2	11.2		314	0.59		87	5
45	3	tofacitinib	0.0930233	13	10	10mg_bid_8w	po	3	2	8	86	45 02	2	0.453488	39.3	11.3		320	0.55		88	5
45	1	placebo	0.211111	1	0			0	4	19	90	45 04	4	0.340659	37.2	10.8		313	0.55		86	0
45	2	tofacitinib	0.247059	13	5	5mg_bid_8w	po	3	4	21	85	45 04	4	0.627907	40.2	11.2		314	0.59		87	5
45	3	tofacitinib	0.22093	13	10	10mg_bid_8w	po	3	4	19	86	45 04	4	0.453488	39.3	11.3		320	0.55		88	5
45	1	placebo	0.366667	1	0			0	8	33	90	45 08	6	0.340659	37.2	10.8		313	0.55		86	0
45	2	tofacitinib	0.435294	13	5	5mg_bid_8w	po	3	8	37	85	45 08	6	0.627907	40.2	11.2		314	0.59		87	5
45	3	tofacitinib	0.430233	13	10	10mg_bid_8w	po	3	8	37	86	45 08	6	0.453488	39.3	11.3		320	0.55		88	5
46	1	placebo	0.204545	1	0			0	2	9	44	46 02	2	0.409091	35.1	6.8	27	298.6	1.98		89	0
46	2	filgotinib	0.164062	14	200	200mg_qd_10w	po	3	2	21	128	46 02	2	0.453846	37.4	8.8	30	291.3	1.42		90	5
46	1	placebo	0.181818	1	0			0	4	8	44	46 04	4	0.409091	35.1	6.8	27	298.6	1.98		89	0
46	2	filgotinib	0.335938	14	200	200mg_qd_10w	po	3	4	43	128	46 04	4	0.453846	37.4	8.8	30	291.3	1.42		90	5
46	1	placebo	0.272727	1	0			0	6	12	44	46 06	5	0.409091	35.1	6.8	27	298.6	1.98		89	0
46	2	filgotinib	0.40625	14	200	200mg_qd_10w	po	3	6	52	128	46 06	5	0.453846	37.4	8.8	30	291.3	1.42		90	5
46	1	placebo	0.227273	1	0			0	10	10	44	46 1	7	0.409091	35.1	6.8	27	298.6	1.98		89	0
46	2	filgotinib	0.46875	14	200	200mg_qd_10w	po	3	10	60	128	46 1	7	0.453846	37.4	8.8	30	291.3	1.42		90	5
50	1	placebo	0.0769231	1	0			0	4	3	39	50 04	4	0.589744	35.5	12	18	295.19	1.4		97	0
50	2	risankizumab	0.097561	16	200	200mg_q4w_0-8w	iv	2	4	4	41	50 04	4	0.634146	38.8	14	29	310.74	1.1		98	3
50	3	risankizumab	0.195122	16	600	600mg_q4w_0-8w	iv	2	4	8	41	50 04	4	0.609756	39.9	14	32	297.37	0.8		99	3
50	1	placebo	0.025641	1	0			0	8	1	39	50 08	6	0.589744	35.5	12	18	295.19	1.4		97	0
50	2	risankizumab	0.170732	16	200	200mg_q4w_0-8w	iv	2	8	7	41	50 08	6	0.634146	38.8	14	29	310.74	1.1		98	3
50	3	risankizumab	0.243902	16	600	600mg_q4w_0-8w	iv	2	8	10	41	50 08	6	0.609756	39.9	14	32	297.37	0.8		99	3
50	1	placebo	0.153846	1	0			0	12	6	39	50 12	8	0.589744	35.5	12	18	295.19	1.4		97	0
50	2	risankizumab	0.243902	16	200	200mg_q4w_0-8w	iv	2	12	10	41	50 12	8	0.634146	38.8	14	29	310.74	1.1		98	3
50	3	risankizumab	0.365854	16	600	600mg_q4w_0-8w	iv	2	12	15	41	50 12	8	0.609756	39.9	14	32	297.37	0.8		99	3
51	1	placebo	0.0144928	1	0			0	2	1	69	51 02	2	0.449275	38.4	10		320.7	2.04		100	0
51	2	PF-04236921	0.0153846	17	10	10mg_0,4w	sc	1	2	1	65	51 02	2	0.492537	38.9	11		319.9	1.64		101	3
51	3	PF-04236921	0.028169	17	50	50mg_0,4w	sc	1	2	2	71	51 02	2	0.380282	38.9	9.8		296.7	2.11		102	3
51	4	PF-04236921	0.075	17	200	200mg_0,4w	sc	1	2	3	40	51 02	2	0.375	42.2	11.5		337.4	3.22		103	3
51	1	placebo	0.0144928	1	0			0	4	1	69	51 04	4	0.449275	38.4	10		320.7	2.04		100	0
51	2	PF-04236921	0.0153846	17	10	10mg_0,4w	sc	1	4	1	65	51 04	4	0.492537	38.9	11		319.9	1.64		101	3
51	3	PF-04236921	0.056338	17	50	50mg_0,4w	sc	1	4	4	71	51 04	4	0.380282	38.9	9.8		296.7	2.11		102	3
51	4	PF-04236921	0.05	17	200	200mg_0,4w	sc	1	4	2	40	51 04	4	0.375	42.2	11.5		337.4	3.22		103	3
51	1	placebo	0.0289855	1	0			0	6	2	69	51 06	5	0.449275	38.4	10		320.7	2.04		100	0
51	2	PF-04236921	0.0307692	17	10	10mg_0,4w	sc	1	6	2	65	51 06	5	0.492537	38.9	11		319.9	1.64		101	3
51	3	PF-04236921	0.056338	17	50	50mg_0,4w	sc	1	6	4	71	51 06	5	0.380282	38.9	9.8		296.7	2.11		102	3
51	4	PF-04236921	0.1	17	200	200mg_0,4w	sc	1	6	4	40	51 06	5	0.375	42.2	11.5		337.4	3.22		103	3
51	1	placebo	0.0434783	1	0			0	8	3	69	51 08	6	0.449275	38.4	10		320.7	2.04		100	0
51	2	PF-04236921	0.0307692	17	10	10mg_0,4w	sc	1	8	2	65	51 08	6	0.492537	38.9	11		319.9	1.64		101	3
51	3	PF-04236921	0.0704225	17	50	50mg_0,4w	sc	1	8	5	71	51 08	6	0.380282	38.9	9.8		296.7	2.11		102	3
51	4	PF-04236921	0.1	17	200	200mg_0,4w	sc	1	8	4	40	51 08	6	0.375	42.2	11.5		337.4	3.22		103	3
51	1	placebo	0.0434783	1	0			0	10	3	69	51 1	7	0.449275	38.4	10		320.7	2.04		100	0
51	2	PF-04236921	0.0615385	17	10	10mg_0,4w	sc	1	10	4	65	51 1	7	0.492537	38.9	11		319.9	1.64		101	3
51	3	PF-04236921	0.084507	17	50	50mg_0,4w	sc	1	10	6	71	51 1	7	0.380282	38.9	9.8		296.7	2.11		102	3
51	4	PF-04236921	0.15	17	200	200mg_0,4w	sc	1	10	6	40	51 1	7	0.375	42.2	11.5		337.4	3.22		103	3
51	1	placebo	0.0289855	1	0			0	12	2	69	51 12	8	0.449275	38.4	10		320.7	2.04		100	0
51	2	PF-04236921	0.0307692	17	10	10mg_0,4w	sc	1	12	2	65	51 12	8	0.492537	38.9	11		319.9	1.64		101	3
51	3	PF-04236921	0.0704225	17	50	50mg_0,4w	sc	1	12	5	71	51 12	8	0.380282	38.9	9.8		296.7	2.11		102	3
51	4	PF-04236921	0.125	17	200	200mg_0,4w	sc	1	12	5	40	51 12	8	0.375	42.2	11.5		337.4	3.22		103	3
52	1	placebo	0.175439	1	0			0	8	10	57	52 08	6	0.52381	34.4	11.5	30.2	313.1	1.89		104	0
52	2	PF-00547659	0.3	24	22.5	22.5mg_q4w_0-8w	sc	1	8	15	50	52 08	6	0.272727	37.3	12.7	33.3	307.4	2.11		105	8
52	3	PF-00547659	0.232143	24	75	75mg_q4w_0-8w	sc	1	8	13	56	52 08	6	0.461538	34.4	11.4	32.3	324.1	1.46		106	8
52	4	PF-00547659	0.274194	24	225	225mg_q4w_0-8w	sc	1	8	17	62	52 08	6	0.367647	35.9	12	30.9	316.4	1.72		107	8
52	1	placebo	0.236364	1	0			0	12	13	55	52 12	8	0.52381	34.4	11.5	30.2	313.1	1.89		104	0
52	2	PF-00547659	0.27451	24	22.5	22.5mg_q4w_0-8w	sc	1	12	14	51	52 12	8	0.272727	37.3	12.7	33.3	307.4	2.11		105	8
52	3	PF-00547659	0.285714	24	75	75mg_q4w_0-8w	sc	1	12	14	49	52 12	8	0.461538	34.4	11.4	32.3	324.1	1.46		106	8
52	4	PF-00547659	0.295082	24	225	225mg_q4w_0-8w	sc	1	12	18	61	52 12	8	0.367647	35.9	12	30.9	316.4	1.72		107	8
53	1	placebo	0.15	1	0			0	8	9	60	53 08	6	0.383333	38.1	11.2		312.4	2.11		108	0
53	2	brazikumab	0.271186	18	700	700mg_0,4	iv	2	8	16	59	53 08	6	0.372881	34.9	13.1		325	2.98		109	3
53	1	placebo	0.133333	1	0			0	12	8	60	53 12	8	0.383333	38.1	11.2		312.4	2.11		108	0
53	2	brazikumab	0.20339	18	700	700mg_0,4	iv	2	12	12	59	53 12	8	0.372881	34.9	13.1		325	2.98		109	3
54	1	placebo	0.135135	1	0			0	2	5	37	54 02	2	0.351351	40.5	8.7		276	0.7		110	0
54	2	upadacitinib	0.0769231	19	3	3mg_bid_16w	po	3	2	3	39	54 02	2	0.512821	39.7	10.7		288	0.6		111	5
54	3	upadacitinib	0.189189	19	6	6mg_bid_16w	po	3	2	7	37	54 02	2	0.432432	40.5	8.8		296	1.17		112	5
54	4	upadacitinib	0.166667	19	12	12mg_bid_16w	po	3	2	6	36	54 02	2	0.527778	40.8	9.1		280	1.66		113	5
54	5	upadacitinib	0.171429	19	12	24mg_qd_16w	po	3	2	6	35	54 02	2	0.457143	40.2	10.8		305	0.74		114	5
54	6	upadacitinib	0.194444	19	24	24mg_bid_16w	po	3	2	7	36	54 02	2	0.305556	42.5	14.1		277.5	0.59		115	5
54	1	placebo	0.162162	1	0			0	4	6	37	54 04	4	0.351351	40.5	8.7		276	0.7		110	0
54	2	upadacitinib	0.153846	19	3	3mg_bid_16w	po	3	4	6	39	54 04	4	0.512821	39.7	10.7		288	0.6		111	5
54	3	upadacitinib	0.351351	19	6	6mg_bid_16w	po	3	4	13	37	54 04	4	0.432432	40.5	8.8		296	1.17		112	5
54	4	upadacitinib	0.277778	19	12	12mg_bid_16w	po	3	4	10	36	54 04	4	0.527778	40.8	9.1		280	1.66		113	5
54	5	upadacitinib	0.171429	19	12	24mg_qd_16w	po	3	4	6	35	54 04	4	0.457143	40.2	10.8		305	0.74		114	5
54	6	upadacitinib	0.361111	19	24	24mg_bid_16w	po	3	4	13	36	54 04	4	0.305556	42.5	14.1		277.5	0.59		115	5
54	1	placebo	0.189189	1	0			0	8	7	37	54 08	6	0.351351	40.5	8.7		276	0.7		110	0
54	2	upadacitinib	0.230769	19	3	3mg_bid_16w	po	3	8	9	39	54 08	6	0.512821	39.7	10.7		288	0.6		111	5
54	3	upadacitinib	0.297297	19	6	6mg_bid_16w	po	3	8	11	37	54 08	6	0.432432	40.5	8.8		296	1.17		112	5
54	4	upadacitinib	0.305556	19	12	12mg_bid_16w	po	3	8	11	36	54 08	6	0.527778	40.8	9.1		280	1.66		113	5
54	5	upadacitinib	0.142857	19	12	24mg_qd_16w	po	3	8	5	35	54 08	6	0.457143	40.2	10.8		305	0.74		114	5
54	6	upadacitinib	0.361111	19	24	24mg_bid_16w	po	3	8	13	36	54 08	6	0.305556	42.5	14.1		277.5	0.59		115	5
54	1	placebo	0.216216	1	0			0	12	8	37	54 12	8	0.351351	40.5	8.7		276	0.7		110	0
54	2	upadacitinib	0.179487	19	3	3mg_bid_16w	po	3	12	7	39	54 12	8	0.512821	39.7	10.7		288	0.6		111	5
54	3	upadacitinib	0.405405	19	6	6mg_bid_16w	po	3	12	15	37	54 12	8	0.432432	40.5	8.8		296	1.17		112	5
54	4	upadacitinib	0.416667	19	12	12mg_bid_16w	po	3	12	15	36	54 12	8	0.527778	40.8	9.1		280	1.66		113	5
54	5	upadacitinib	0.228571	19	12	24mg_qd_16w	po	3	12	8	35	54 12	8	0.457143	40.2	10.8		305	0.74		114	5
54	6	upadacitinib	0.361111	19	24	24mg_bid_16w	po	3	12	13	36	54 12	8	0.305556	42.5	14.1		277.5	0.59		115	5
54	1	placebo	0.162162	1	0			0	16	6	37	54 16	10	0.351351	40.5	8.7		276	0.7		110	0
54	2	upadacitinib	0.205128	19	3	3mg_bid_16w	po	3	16	8	39	54 16	10	0.512821	39.7	10.7		288	0.6		111	5
54	3	upadacitinib	0.297297	19	6	6mg_bid_16w	po	3	16	11	37	54 16	10	0.432432	40.5	8.8		296	1.17		112	5
54	4	upadacitinib	0.388889	19	12	12mg_bid_16w	po	3	16	14	36	54 16	10	0.527778	40.8	9.1		280	1.66		113	5
54	5	upadacitinib	0.2	19	12	24mg_qd_16w	po	3	16	7	35	54 16	10	0.457143	40.2	10.8		305	0.74		114	5
54	6	upadacitinib	0.305556	19	24	24mg_bid_16w	po	3	16	11	36	54 16	10	0.305556	42.5	14.1		277.5	0.59		115	5
55	1	placebo	0.116279	1	0			0	4	5	43	55 04	4	0.372093	39	6.7	30	303			116	0
55	2	fontolizumab	0.311111	20	280	4mg/kg_0,4w	iv	2	4	14	45	55 04	4	0.355556	43	6.4	27	300			117	9
55	3	fontolizumab	0.177778	20	700	10mg/kg_0,4w	iv	2	4	8	45	55 04	4	0.488889	39	7.4	18	303			118	9
55	1	placebo	0.153846	1	0			0	6	4	26	55 06	5	0.372093	39	6.7	30	303			116	0
55	2	fontolizumab	0.46875	20	280	4mg/kg_0,4w	iv	2	6	15	32	55 06	5	0.355556	43	6.4	27	300			117	9
55	3	fontolizumab	0.451613	20	700	10mg/kg_0,4w	iv	2	6	14	31	55 06	5	0.488889	39	7.4	18	303			118	9
55	1	placebo	0.269231	1	0			0	8	7	26	55 08	6	0.372093	39	6.7	30	303			116	0
55	2	fontolizumab	0.40625	20	280	4mg/kg_0,4w	iv	2	8	13	32	55 08	6	0.355556	43	6.4	27	300			117	9
55	3	fontolizumab	0.533333	20	700	10mg/kg_0,4w	iv	2	8	16	30	55 08	6	0.488889	39	7.4	18	303			118	9
56	1	placebo	0.175	1	0			0	4	7	40	56 04	4	0.375	36	7.9	50	324.05	1.75	128.3	119	0
56	2	fontolizumab	0.175	20	70	1mg/kg_0 0.1mg/kg_4,8,12w	iv-sc	4	4	7	40	56 04	4	0.487805	33	9.1	37	327.01	2.93	122.4	120	9
56	3	fontolizumab	0.205128	20	70	1mg/kg_0 1mg/kg_4,8,12w	iv-sc	4	4	8	39	56 04	4	0.475	34.5	10.8	28	323.24	2.05	128.7	121	9
56	4	fontolizumab	0.205128	20	280	4mg/kg_0 0.1mg/kg_4,8,12w	iv-sc	4	4	8	39	56 04	4	0.5	34.5	10	40	312.57	1.87	131.5	122	9
56	5	fontolizumab	0.0512821	20	280	4mg/kg_0 1mg/kg_4,8,12w	iv-sc	4	4	2	39	56 04	4	0.425	34	8.4	32	329.44	1.57	119.5	123	9
56	1	placebo	0.205128	1	0			0	6	8	39	56 06	5	0.375	36	7.9	50	324.05	1.75	128.3	119	0
56	2	fontolizumab	0.225	20	70	1mg/kg_0 0.1mg/kg_4,8,12w	iv-sc	4	6	9	40	56 06	5	0.487805	33	9.1	37	327.01	2.93	122.4	120	9
56	3	fontolizumab	0.368421	20	70	1mg/kg_0 1mg/kg_4,8,12w	iv-sc	4	6	14	38	56 06	5	0.475	34.5	10.8	28	323.24	2.05	128.7	121	9
56	4	fontolizumab	0.375	20	280	4mg/kg_0 0.1mg/kg_4,8,12w	iv-sc	4	6	15	40	56 06	5	0.5	34.5	10	40	312.57	1.87	131.5	122	9
56	5	fontolizumab	0.285714	20	280	4mg/kg_0 1mg/kg_4,8,12w	iv-sc	4	6	10	35	56 06	5	0.425	34	8.4	32	329.44	1.57	119.5	123	9
56	1	placebo	0.153846	1	0			0	8	6	39	56 08	6	0.375	36	7.9	50	324.05	1.75	128.3	119	0
56	2	fontolizumab	0.243902	20	70	1mg/kg_0 0.1mg/kg_4,8,12w	iv-sc	4	8	10	41	56 08	6	0.487805	33	9.1	37	327.01	2.93	122.4	120	9
56	3	fontolizumab	0.378378	20	70	1mg/kg_0 1mg/kg_4,8,12w	iv-sc	4	8	14	37	56 08	6	0.475	34.5	10.8	28	323.24	2.05	128.7	121	9
56	4	fontolizumab	0.461538	20	280	4mg/kg_0 0.1mg/kg_4,8,12w	iv-sc	4	8	18	39	56 08	6	0.5	34.5	10	40	312.57	1.87	131.5	122	9
56	5	fontolizumab	0.243243	20	280	4mg/kg_0 1mg/kg_4,8,12w	iv-sc	4	8	9	37	56 08	6	0.425	34	8.4	32	329.44	1.57	119.5	123	9
56	1	placebo	0.230769	1	0			0	12	9	39	56 12	8	0.375	36	7.9	50	324.05	1.75	128.3	119	0
56	2	fontolizumab	0.275	20	70	1mg/kg_0 0.1mg/kg_4,8,12w	iv-sc	4	12	11	40	56 12	8	0.487805	33	9.1	37	327.01	2.93	122.4	120	9
56	3	fontolizumab	0.315789	20	70	1mg/kg_0 1mg/kg_4,8,12w	iv-sc	4	12	12	38	56 12	8	0.475	34.5	10.8	28	323.24	2.05	128.7	121	9
56	4	fontolizumab	0.384615	20	280	4mg/kg_0 0.1mg/kg_4,8,12w	iv-sc	4	12	15	39	56 12	8	0.5	34.5	10	40	312.57	1.87	131.5	122	9
56	5	fontolizumab	0.305556	20	280	4mg/kg_0 1mg/kg_4,8,12w	iv-sc	4	12	11	36	56 12	8	0.425	34	8.4	32	329.44	1.57	119.5	123	9
56	1	placebo	0.236842	1	0			0	16	9	38	56 16	10	0.375	36	7.9	50	324.05	1.75	128.3	119	0
56	2	fontolizumab	0.25641	20	70	1mg/kg_0 0.1mg/kg_4,8,12w	iv-sc	4	16	10	39	56 16	10	0.487805	33	9.1	37	327.01	2.93	122.4	120	9
56	3	fontolizumab	0.432432	20	70	1mg/kg_0 1mg/kg_4,8,12w	iv-sc	4	16	16	37	56 16	10	0.475	34.5	10.8	28	323.24	2.05	128.7	121	9
56	4	fontolizumab	0.447368	20	280	4mg/kg_0 0.1mg/kg_4,8,12w	iv-sc	4	16	17	38	56 16	10	0.5	34.5	10	40	312.57	1.87	131.5	122	9
56	5	fontolizumab	0.30303	20	280	4mg/kg_0 1mg/kg_4,8,12w	iv-sc	4	16	10	33	56 16	10	0.425	34	8.4	32	329.44	1.57	119.5	123	9
56	1	placebo	0.236842	1	0			0	28	9	38	56 28	15	0.375	36	7.9	50	324.05	1.75	128.3	119	0
56	2	fontolizumab	0.230769	20	70	1mg/kg_0 0.1mg/kg_4,8,12w	iv-sc	4	28	9	39	56 28	15	0.487805	33	9.1	37	327.01	2.93	122.4	120	9
56	3	fontolizumab	0.323529	20	70	1mg/kg_0 1mg/kg_4,8,12w	iv-sc	4	28	11	34	56 28	15	0.475	34.5	10.8	28	323.24	2.05	128.7	121	9
56	4	fontolizumab	0.358974	20	280	4mg/kg_0 0.1mg/kg_4,8,12w	iv-sc	4	28	14	39	56 28	15	0.5	34.5	10	40	312.57	1.87	131.5	122	9
56	5	fontolizumab	0.21875	20	280	4mg/kg_0 1mg/kg_4,8,12w	iv-sc	4	28	7	32	56 28	15	0.425	34	8.4	32	329.44	1.57	119.5	123	9
57	1	placebo	0.132653	1	0			0	8	13	98	57 08	6	0.42	36.2	11.07		303.8			124	0
57	2	abrilumab	0.230769	21	21	21mg_1,2,3w_q4w_0-24w	sc	1	8	6	26	57 08	6	0.555556	38.9	12.58		310			125	2
57	3	abrilumab	0.142857	21	70	70mg_1,2,3w_q4w_0-24w	sc	1	8	12	84	57 08	6	0.4	35.6	10.69		314			126	2
57	4	abrilumab	0.195122	21	210	210mg_1,2,3w_q4w_0-24w	sc	1	8	8	41	57 08	6	0.452381	36.5	11.31		319.3			127	2
57	1	placebo	0.183673	1	0			0	12	13	98	57 12	8	0.42	36.2	11.07		303.8			124	0
57	2	abrilumab	0.346154	21	21	21mg_1,2,3w_q4w_0-24w	sc	1	12	6	26	57 12	8	0.555556	38.9	12.58		310			125	2
57	3	abrilumab	0.25	21	70	70mg_1,2,3w_q4w_0-24w	sc	1	12	12	84	57 12	8	0.4	35.6	10.69		314			126	2
57	4	abrilumab	0.268293	21	210	210mg_1,2,3w_q4w_0-24w	sc	1	12	8	41	57 12	8	0.452381	36.5	11.31		319.3			127	2
58	1	placebo	0.145833	1	0			0	4	21	144	58 04	4	0.42	36.6	6	33	329.9	3.08		128	0
58	2	vercirnon	0.163265	22	250	250mg_qd_12w	po	3	4	16	98	58 04	4	0.47	37.2	6	25	340.1	2.8		129	10
58	3	vercirnon	0.135417	22	500	250mg_bid_12w	po	3	4	13	96	58 04	4	0.45	37.3	5	37	323.3	2.76		130	10
58	4	vercirnon	0.154639	22	500	500mg_qd_12w	po	3	4	15	97	58 04	4	0.51	34.9	6	30	332.5	3.03		131	10
58	1	placebo	0.256944	1	0			0	8	37	144	58 08	6	0.42	36.6	6	33	329.9	3.08		128	0
58	2	vercirnon	0.234694	22	250	250mg_qd_12w	po	3	8	23	98	58 08	6	0.47	37.2	6	25	340.1	2.8		129	10
58	3	vercirnon	0.166667	22	500	250mg_bid_12w	po	3	8	16	96	58 08	6	0.45	37.3	5	37	323.3	2.76		130	10
58	4	vercirnon	0.237113	22	500	500mg_qd_12w	po	3	8	23	97	58 08	6	0.51	34.9	6	30	332.5	3.03		131	10
58	1	placebo	0.270833	1	0			0	12	39	144	58 12	8	0.42	36.6	6	33	329.9	3.08		128	0
58	2	vercirnon	0.255102	22	250	250mg_qd_12w	po	3	12	25	98	58 12	8	0.47	37.2	6	25	340.1	2.8		129	10
58	3	vercirnon	0.21875	22	500	250mg_bid_12w	po	3	12	21	96	58 12	8	0.45	37.3	5	37	323.3	2.76		130	10
58	4	vercirnon	0.298969	22	500	500mg_qd_12w	po	3	12	29	97	58 12	8	0.51	34.9	6	30	332.5	3.03		131	10
61	1	placebo	0.123153	1	0			0	8	25	203	61 08	6	0.493	36.1	9.5	24.8	313.7	1.22		132	0
61	2	vercirnon	0.103448	22	500	500mg_qd_12w	po	3	8	21	203	61 08	6	0.36	37	10.7	26.6	314.6	1.35		133	10
61	3	vercirnon	0.0990099	22	1000	500mg_bid_12w	po	3	8	20	202	61 08	6	0.475	35.9	10.2	24.8	321.8	1.49		134	10
61	1	placebo	0.152709	1	0			0	12	31	203	61 12	8	0.493	36.1	9.5	24.8	313.7	1.22		132	0
61	2	vercirnon	0.133005	22	500	500mg_qd_12w	po	3	12	27	203	61 12	8	0.36	37	10.7	26.6	314.6	1.35		133	10
61	3	vercirnon	0.128713	22	1000	500mg_bid_12w	po	3	12	26	202	61 12	8	0.475	35.9	10.2	24.8	321.8	1.49		134	10
62	1	placebo	0.0307	1	0			0	1	2	63	62 01	1	0.571	35.1			311.2	2.13		135	0
62	2	laquinimod	0.0714	23	0.5	0.5mg_qd_8w	po	3	1	2	29	62 01	1	0.448	39.6			288.3	1.71		136	7
62	3	laquinimod	0.0659	23	1	1.0mg_qd_8w	po	3	1	2	30	62 01	1	0.433	38.2			291.9	0.67		137	7
62	4	laquinimod	0.0672	23	1.5	1.5mg_qd_8w	po	3	1	2	29	62 01	1	0.276	40.9			297.8	1.51		138	7
62	5	laquinimod	0.0695	23	2	2.0mg_qd_8w	po	3	1	2	29	62 01	1	0.414	37.4			313.2	0.65		139	7
62	1	placebo	0.073	1	0			0	2	5	63	62 02	2	0.571	35.1			311.2	2.13		135	0
62	2	laquinimod	0.1722	23	0.5	0.5mg_qd_8w	po	3	2	5	29	62 02	2	0.448	39.6			288.3	1.71		136	7
62	3	laquinimod	0.0988	23	1	1.0mg_qd_8w	po	3	2	3	30	62 02	2	0.433	38.2			291.9	0.67		137	7
62	4	laquinimod	0.0659	23	1.5	1.5mg_qd_8w	po	3	2	2	29	62 02	2	0.276	40.9			297.8	1.51		138	7
62	5	laquinimod	0.0646	23	2	2.0mg_qd_8w	po	3	2	2	29	62 02	2	0.414	37.4			313.2	0.65		139	7
62	1	placebo	0.1242	1	0			0	4	8	63	62 04	4	0.571	35.1			311.2	2.13		135	0
62	2	laquinimod	0.3087	23	0.5	0.5mg_qd_8w	po	3	4	9	29	62 04	4	0.448	39.6			288.3	1.71		136	7
62	3	laquinimod	0.1295	23	1	1.0mg_qd_8w	po	3	4	4	30	62 04	4	0.433	38.2			291.9	0.67		137	7
62	4	laquinimod	0.2064	23	1.5	1.5mg_qd_8w	po	3	4	6	29	62 04	4	0.276	40.9			297.8	1.51		138	7
62	5	laquinimod	0.137	23	2	2.0mg_qd_8w	po	3	4	4	29	62 04	4	0.414	37.4			313.2	0.65		139	7
62	1	placebo	0.1255	1	0			0	6	8	63	62 06	5	0.571	35.1			311.2	2.13		135	0
62	2	laquinimod	0.4463	23	0.5	0.5mg_qd_8w	po	3	6	13	29	62 06	5	0.448	39.6			288.3	1.71		136	7
62	3	laquinimod	0.2312	23	1	1.0mg_qd_8w	po	3	6	7	30	62 06	5	0.433	38.2			291.9	0.67		137	7
62	4	laquinimod	0.2057	23	1.5	1.5mg_qd_8w	po	3	6	6	29	62 06	5	0.276	40.9			297.8	1.51		138	7
62	5	laquinimod	0.0688	23	2	2.0mg_qd_8w	po	3	6	2	29	62 06	5	0.414	37.4			313.2	0.65		139	7
62	1	placebo	0.1601	1	0			0	8	10	63	62 08	6	0.571	35.1			311.2	2.13		135	0
62	2	laquinimod	0.4818	23	0.5	0.5mg_qd_8w	po	3	8	14	29	62 08	6	0.448	39.6			288.3	1.71		136	7
62	3	laquinimod	0.2644	23	1	1.0mg_qd_8w	po	3	8	8	30	62 08	6	0.433	38.2			291.9	0.67		137	7
62	4	laquinimod	0.1376	23	1.5	1.5mg_qd_8w	po	3	8	4	29	62 08	6	0.276	40.9			297.8	1.51		138	7
62	5	laquinimod	0.1702	23	2	2.0mg_qd_8w	po	3	8	5	29	62 08	6	0.414	37.4			313.2	0.65		139	7
62	1	placebo	0.2224	1	0			0	12	14	63	62 12	8	0.571	35.1			311.2	2.13		135	0
62	2	laquinimod	0.5157	23	0.5	0.5mg_qd_8w	po	3	12	15	29	62 12	8	0.448	39.6			288.3	1.71		136	7
62	3	laquinimod	0.3299	23	1	1.0mg_qd_8w	po	3	12	10	30	62 12	8	0.433	38.2			291.9	0.67		137	7
62	4	laquinimod	0.2044	23	1.5	1.5mg_qd_8w	po	3	12	6	29	62 12	8	0.276	40.9			297.8	1.51		138	7
62	5	laquinimod	0.1683	23	2	2.0mg_qd_8w	po	3	12	5	29	62 12	8	0.414	37.4			313.2	0.65		139	7

## Sheet: CDAI-100
trialNO	armNO	treatment	cdai100	FLAG	DOSE	Regimen	method	methodFlag	week	event	no	group week	tp1	male	age	dur	smok	CDAI	CRP	IBDQ	group	CLASS
7	1	placebo	0.223529	1	0			0	2	38	170	7 02	2	0.529	35	2.4	0.353			122.1	1	0
7	2	Infliximab	0.473373	2	350	5mg/kg_0,2,6,14,22	iv	2	2	80	169	7 02	2	0.521	34	2.2	0.385			125.3	2	1
7	1	placebo	0.376471	1	0			0	6	64	170	7 06	5	0.529	35	2.4	0.353			122.1	1	0
7	2	Infliximab	0.633136	2	350	5mg/kg_0,2,6,14,22	iv	2	6	107	169	7 06	5	0.521	34	2.2	0.385			125.3	2	1
7	1	placebo	0.394118	1	0			0	10	67	170	7 1	7	0.529	35	2.4	0.353			122.1	1	0
7	2	Infliximab	0.692308	2	350	5mg/kg_0,2,6,14,22	iv	2	10	117	169	7 1	7	0.521	34	2.2	0.385			125.3	2	1
7	1	placebo	0.388235	1	0			0	18	66	170	7 18	11	0.529	35	2.4	0.353			122.1	1	0
7	2	Infliximab	0.627219	2	350	5mg/kg_0,2,6,14,22	iv	2	18	106	169	7 18	11	0.521	34	2.2	0.385			125.3	2	1
7	1	placebo	0.376471	1	0			0	26	64	170	7 26	14	0.529	35	2.4	0.353			122.1	1	0
7	2	Infliximab	0.621302	2	350	5mg/kg_0,2,6,14,22	iv	2	26	105	169	7 26	14	0.521	34	2.2	0.385			125.3	2	1
11	1	placebo	0.272	1	0			0	4	68	250	11 04	4	0.41	37.7	10.025	0.19	299.5	2.34	123.6	4	0
11	2	natalizumab	0.389961	3	300	300mg_0,4,8	iv	2	4	101	259	11 04	4	0.41	37.6	10.17	0.22	303.9	2.3	122.5	3	2
11	1	placebo	0.332	1	0			0	8	83	250	11 08	6	0.41	37.7	10.025	0.19	299.5	2.34	123.6	4	0
11	2	natalizumab	0.478764	3	300	300mg_0,4,8	iv	2	8	124	259	11 08	6	0.41	37.6	10.17	0.22	303.9	2.3	122.5	3	2
11	1	placebo	0.312	1	0			0	12	78	250	11 12	8	0.41	37.7	10.025	0.19	299.5	2.34	123.6	4	0
11	2	natalizumab	0.490347	3	300	300mg_0,4,8	iv	2	12	127	259	11 12	8	0.41	37.6	10.17	0.22	303.9	2.3	122.5	3	2
20	1	placebo	0.15625	1	0			0	2	5	32	20 02	2	0.813	30.6						7	0
20	2	certolizumab	0.366667	4	200	200mg_q2w_0-4w	sc	1	2	11	30	20 02	2	0.833	32.7						5	1
20	3	certolizumab	0.290323	4	400	400mg_q2w_0-4w	sc	1	2	9	31	20 02	2	0.688	31.4						6	1
20	1	placebo	0.1875	1	0			0	4	6	32	20 04	4	0.813	30.6						7	0
20	2	certolizumab	0.366667	4	200	200mg_q2w_0-4w	sc	1	4	11	30	20 04	4	0.833	32.7						5	1
20	3	certolizumab	0.322581	4	400	400mg_q2w_0-4w	sc	1	4	10	31	20 04	4	0.688	31.4						6	1
20	1	placebo	0.21875	1	0			0	6	7	32	20 06	5	0.813	30.6						7	0
20	2	certolizumab	0.366667	4	200	200mg_q2w_0-4w	sc	1	6	11	30	20 06	5	0.833	32.7						5	1
20	3	certolizumab	0.419355	4	400	400mg_q2w_0-4w	sc	1	6	13	31	20 06	5	0.688	31.4						6	1
22	1	placebo	0.200957	1	0			0	2	42	209	22 02	2	0.4186	38.8	7		293	0.922	122.1	9	0
22	2	certolizumab	0.330233	4	400	400mg_q2w_0-4w	sc	1	2	71	215	22 02	2	0.47085	36.3	7.5		293	0.933	126.5	8	1
22	1	placebo	0.263158	1	0			0	4	55	209	22 04	4	0.4186	38.8	7		293	0.922	122.1	9	0
22	2	certolizumab	0.353488	4	400	400mg_q2w_0-4w	sc	1	4	76	215	22 04	4	0.47085	36.3	7.5		293	0.933	126.5	8	1
22	1	placebo	0.339713	1	0			0	6	71	209	22 06	5	0.4186	38.8	7		293	0.922	122.1	9	0
22	2	certolizumab	0.404651	4	400	400mg_q2w_0-4w	sc	1	6	87	215	22 06	5	0.47085	36.3	7.5		293	0.933	126.5	8	1
23	1	placebo	0.140244	1	0			0	2	46	328	23 02	2	0.399	38	8	0.33	284.3	0.902		102	0
23	2	certolizumab	0.250755	4	400	400mg_0,2,4,q4w_8-26w	sc	1	2	83	331	23 02	2	0.4743	37	7	0.31	284.7	0.82		101	1
23	1	placebo	0.210366	1	0			0	4	69	328	23 04	4	0.399	38	8	0.33	284.3	0.902		102	0
23	2	certolizumab	0.280967	4	400	400mg_0,2,4,q4w_8-26w	sc	1	4	93	331	23 04	4	0.4743	37	7	0.31	284.7	0.82		101	1
23	1	placebo	0.265244	1	0			0	6	87	328	23 06	5	0.399	38	8	0.33	284.3	0.902		102	0
23	2	certolizumab	0.347432	4	400	400mg_0,2,4,q4w_8-26w	sc	1	6	115	331	23 06	5	0.4743	37	7	0.31	284.7	0.82		101	1
23	1	placebo	0.289634	1	0			0	8	95	328	23 08	6	0.399	38	8	0.33	284.3	0.902		102	0
23	2	certolizumab	0.350453	4	400	400mg_0,2,4,q4w_8-26w	sc	1	8	116	331	23 08	6	0.4743	37	7	0.31	284.7	0.82		101	1
23	1	placebo	0.310976	1	0			0	12	102	328	23 12	8	0.399	38	8	0.33	284.3	0.902		102	0
23	2	certolizumab	0.359517	4	400	400mg_0,2,4,q4w_8-26w	sc	1	12	119	331	23 12	8	0.4743	37	7	0.31	284.7	0.82		101	1
23	1	placebo	0.289634	1	0			0	16	95	328	23 16	10	0.399	38	8	0.33	284.3	0.902		102	0
23	2	certolizumab	0.380665	4	400	400mg_0,2,4,q4w_8-26w	sc	1	16	126	331	23 16	10	0.4743	37	7	0.31	284.7	0.82		101	1
23	1	placebo	0.271341	1	0			0	20	89	328	23 2	12	0.399	38	8	0.33	284.3	0.902		102	0
23	2	certolizumab	0.34139	4	400	400mg_0,2,4,q4w_8-26w	sc	1	20	113	331	23 2	12	0.4743	37	7	0.31	284.7	0.82		101	1
23	1	placebo	0.259146	1	0			0	24	85	328	23 24	13	0.399	38	8	0.33	284.3	0.902		102	0
23	2	certolizumab	0.34139	4	400	400mg_0,2,4,q4w_8-26w	sc	1	24	113	331	23 24	13	0.4743	37	7	0.31	284.7	0.82		101	1
23	1	placebo	0.271341	1	0			0	26	89	328	23 26	14	0.399	38	8	0.33	284.3	0.902		102	0
23	2	certolizumab	0.36858	4	400	400mg_0,2,4,q4w_8-26w	sc	1	26	122	331	23 26	14	0.4743	37	7	0.31	284.7	0.82		101	1
26	1	placebo	0.162162	1	0			0	1	12	74	26 01	1	0.47	37		0.38	295.7	0.9	126.9	13	0
26	2	adalimumab	0.22973	5	40	40mg_0 20mg_2	sc	1	1	17	74	26 01	1	0.5	39		0.34	298	0.9	129.9	10	1
26	3	adalimumab	0.253333	5	80	80mg_0 40mg_2	sc	1	1	19	75	26 01	1	0.53	38		0.43	300.7	0.9	126.9	11	1
26	4	adalimumab	0.210526	5	160	160mg_0 80mg_2	sc	1	1	16	76	26 01	1	0.33	39		0.42	295.4	0.7	125.1	12	1
26	1	placebo	0.148649	1	0			0	2	11	74	26 02	2	0.47	37		0.38	295.7	0.9	126.9	13	0
26	2	adalimumab	0.216216	5	40	40mg_0 20mg_2	sc	1	2	16	74	26 02	2	0.5	39		0.34	298	0.9	129.9	10	1
26	3	adalimumab	0.373333	5	80	80mg_0 40mg_2	sc	1	2	28	75	26 02	2	0.53	38		0.43	300.7	0.9	126.9	11	1
26	4	adalimumab	0.315789	5	160	160mg_0 80mg_2	sc	1	2	24	76	26 02	2	0.33	39		0.42	295.4	0.7	125.1	12	1
26	1	placebo	0.256757	1	0			0	4	19	74	26 04	4	0.47	37		0.38	295.7	0.9	126.9	13	0
26	2	adalimumab	0.337838	5	40	40mg_0 20mg_2	sc	1	4	25	74	26 04	4	0.5	39		0.34	298	0.9	129.9	10	1
26	3	adalimumab	0.4	5	80	80mg_0 40mg_2	sc	1	4	30	75	26 04	4	0.53	38		0.43	300.7	0.9	126.9	11	1
26	4	adalimumab	0.5	5	160	160mg_0 80mg_2	sc	1	4	38	76	26 04	4	0.33	39		0.42	295.4	0.7	125.1	12	1
28	1	placebo	0.173913	1	0			0	4	4	23	28 04	4	0.695652	30.4	7.9	0.261	308.1	2.5	139.4	16	0
28	2	adalimumab	0.5	5	80	80mg_0 40mg_2	sc	1	4	17	34	28 04	4	0.470588	30.6	9.2	0.441	302.7	3	148.6	15	1
28	3	adalimumab	0.454545	5	160	160mg_0 80mg_2	sc	1	4	15	33	28 04	4	0.606061	32	11	0.333	300.5	2.2	145.9	14	1
29	1	placebo	0.120482	1	0			0	1	20	166	29 01	1	0.470588	30.6	9.2	0.441	302.7	3	148.6	18	0
29	2	adalimumab	0.194969	5	160	160mg_0 80mg_2	sc	1	1	31	159	29 01	1	0.606061	32	11	0.333	300.5	2.2	145.9	17	1
29	1	placebo	0.180723	1	0			0	2	30	166	29 02	2	0.470588	30.6	9.2	0.441	302.7	3	148.6	18	0
29	2	adalimumab	0.36478	5	160	160mg_0 80mg_2	sc	1	2	58	159	29 02	2	0.606061	32	11	0.333	300.5	2.2	145.9	17	1
29	1	placebo	0.246988	1	0			0	4	41	166	29 04	4	0.470588	30.6	9.2	0.441	302.7	3	148.6	18	0
29	2	adalimumab	0.383648	5	160	160mg_0 80mg_2	sc	1	4	61	159	29 04	4	0.606061	32	11	0.333	300.5	2.2	145.9	17	1
32	1	placebo	0.368421	1	0			0	8	14	38	32 08	6	0.578947	39.1	12.53		311.1	1.71		23	0
32	2	onercept	0.363636	6	10	10mg_tiw_0-8w	sc	1	8	16	44	32 08	6	0.340909	34	7.79		302.7	1.83		19	1
32	3	onercept	0.404762	6	25	25mg_tiw_0-8w	sc	1	8	17	42	32 08	6	0.5	35.7	12.19		327.3	1.82		20	1
32	4	onercept	0.5	6	35	35mg_tiw_0-8w	sc	1	8	20	40	32 08	6	0.425	39.2	10.43		325	2.44		21	1
32	5	onercept	0.325581	6	50	50mg_tiw_0-8w	sc	1	8	14	43	32 08	6	0.418605	35.6	9.37		312.2	2.29		22	1
33	1	placebo	0.310345	1	0			0	8	18	58	33 08	6	0.517	34.5	9.08	0.328	288	2.5	122	26	0
33	2	vedolizumab	0.435484	7	35	0.5mg/kg_0,4w	iv	2	8	27	62	33 08	6	0.403	36	8.75	0.468	288	1.96	131	24	2
33	3	vedolizumab	0.476923	7	35	2.0mg/kg_0,4w	iv	2	8	31	65	33 08	6	0.477	38.5	8	0.415	297	2.46	131	25	2
33	1	placebo	0.275862	1	0			0	16	16	58	33 16	10	0.517	34.5	9.08	0.328	288	2.5	122	26	0
33	2	vedolizumab	0.322581	7	35	0.5mg/kg_0,4w	iv	2	16	20	62	33 16	10	0.403	36	8.75	0.468	288	1.96	131	24	2
33	3	vedolizumab	0.430769	7	35	2.0mg/kg_0,4w	iv	2	16	28	65	33 16	10	0.477	38.5	8	0.415	297	2.46	131	25	2
34	1	placebo	0.256757	1	0			0	6	38	148	34 06	5	0.46622	38.6	8.2	0.23	325	2.713		28	0
34	2	vedolizumab	0.313636	7	300	300mg_0,2	iv	2	6	69	220	34 06	5	0.47727	36.3	9.2	0.245	327	2.874		27	2
35	1	placebo	0.227053	1	0			0	6	47	207	35 06	5	0.46622	38.6	8.2	0.23	325	2.713		30	0
35	2	vedolizumab	0.392344	7	300	300mg_0,2,6	iv	2	6	82	209	35 06	5	0.47727	36.3	9.2	0.245	327	2.874		29	2
35	1	placebo	0.241546	1	0			0	10	50	207	35 1	7	0.46622	38.6	8.2	0.23	325	2.713		30	0
35	2	vedolizumab	0.478469	7	300	300mg_0,2,6	iv	2	10	100	209	35 1	7	0.47727	36.3	9.2	0.245	327	2.874		29	2
36	1	placebo	0.166667	1	0			0	10	13	78	36 1	7	0.52	32.6	8.35	0.141	295	2.848		32	0
36	2	vedolizumab	0.265823	7	300	300mg_0,2,6	iv	2	10	21	79	36 1	7	0.51	33.9	7.2	0.165	303.9	2.234		31	2
37	1	placebo	0.230769	1	0			0	2	6	26	37 02	2	0.576923	37	13	0.27	292	1.2		33	0
37	2	ustekinumab	0.36	8	1.5	90mg_qw_0-3w	sc	1	2	9	25	37 02	2	0.6	37	12	0.4	311	1.7		34	3
37	1	placebo	0.269231	1	0			0	4	7	26	37 04	4	0.576923	37	13	0.27	292	1.2		33	0
37	2	ustekinumab	0.44	8	1.5	90mg_qw_0-3w	sc	1	4	11	25	37 04	4	0.6	37	12	0.4	311	1.7		34	3
37	1	placebo	0.346154	1	0			0	6	9	26	37 06	5	0.576923	37	13	0.27	292	1.2		33	0
37	2	ustekinumab	0.48	8	1.5	90mg_qw_0-3w	sc	1	6	12	25	37 06	5	0.6	37	12	0.4	311	1.7		34	3
37	1	placebo	0.346154	1	0			0	8	9	26	37 08	6	0.576923	37	13	0.27	292	1.2		33	0
37	2	ustekinumab	0.48	8	1.5	90mg_qw_0-3w	sc	1	8	12	25	37 08	6	0.6	37	12	0.4	311	1.7		34	3
37	1	placebo	0.384615	1	0			0	12	10	26	37 12	8	0.576923	37	13	0.27	292	1.2		33	0
37	2	ustekinumab	0.48	8	1.5	90mg_qw_0-3w	sc	1	12	12	25	37 12	8	0.6	37	12	0.4	311	1.7		34	3
37	1	placebo	0.307692	1	0			0	14	8	26	37 14	9	0.576923	37	13	0.27	292	1.2		33	0
37	2	ustekinumab	0.4	8	1.5	90mg_qw_0-3w	sc	1	14	10	25	37 14	9	0.6	37	12	0.4	311	1.7		34	3
37	1	placebo	0.307692	1	0			0	16	8	26	37 16	10	0.576923	37	13	0.27	292	1.2		33	0
37	2	ustekinumab	0.36	8	1.5	90mg_qw_0-3w	sc	1	16	9	25	37 16	10	0.6	37	12	0.4	311	1.7		34	3
42	1	placebo	0.287671	1	0			0	4	21	73	42 04	4	0.410959	42.6	11.52	0.288	305			49	0
42	2	apilimod	0.246575	9	50	50mg_qd_6w	po	3	4	18	73	42 04	4	0.369863	40.6	10.82	0.356	304			47	3
42	3	apilimod	0.256757	9	100	100mg_qd_6w	po	3	4	19	74	42 04	4	0.405405	41.4	11.35	0.338	300			48	3
42	1	placebo	0.30137	1	0			0	6	22	73	42 06	5	0.410959	42.6	11.52	0.288	305			49	0
42	2	apilimod	0.136986	9	50	50mg_qd_6w	po	3	6	10	73	42 06	5	0.369863	40.6	10.82	0.356	304			47	3
42	3	apilimod	0.216216	9	100	100mg_qd_6w	po	3	6	16	74	42 06	5	0.405405	41.4	11.35	0.338	300			48	3
42	1	placebo	0.56	1	0			0	24	14	25	42 24	13	0.410959	42.6	11.52	0.288	305			49	0
42	2	apilimod	0.352941	9	50	50mg_qd_6w	po	3	24	6	17	42 24	13	0.369863	40.6	10.82	0.356	304			47	3
42	3	apilimod	0.555556	9	100	100mg_qd_6w	po	3	24	15	27	42 24	13	0.405405	41.4	11.35	0.338	300			48	3
44	1	placebo	0.294118	1	0			0	4	10	34	44 04	4	0.352941	35.7	8.2	0.294	306.4	1.71		53	0
44	2	tofacitinib	0.305556	10	1	1mg_bid_4w	po	3	4	11	36	44 04	4	0.694444	38.6	11.1	0.222	300.3	1.83		50	5
44	3	tofacitinib	0.454545	10	5	5mg_bid_4w	po	3	4	15	33	44 04	4	0.411765	38.7	10.9	0.324	297.7	1.75		51	5
44	4	tofacitinib	0.371429	10	15	15mg_bid_4w	po	3	4	13	35	44 04	4	0.514286	38.1	11.2	0.229	308	2.61		52	5
45	1	placebo	0.233333	1	0			0	2	21	90	45 02	2	0.340659	37.2	10.8		313	0.55		56	0
45	2	tofacitinib	0.341176	10	5	5mg_bid_8w	po	3	2	29	85	45 02	2	0.627907	40.2	11.2		314	0.59		54	5
45	3	tofacitinib	0.325581	10	10	10mg_bid_8w	po	3	2	28	86	45 02	2	0.453488	39.3	11.3		320	0.55		55	5
45	1	placebo	0.377778	1	0			0	4	34	90	45 04	4	0.340659	37.2	10.8		313	0.55		56	0
45	2	tofacitinib	0.482353	10	5	5mg_bid_8w	po	3	4	41	85	45 04	4	0.627907	40.2	11.2		314	0.59		54	5
45	3	tofacitinib	0.453488	10	10	10mg_bid_8w	po	3	4	39	86	45 04	4	0.453488	39.3	11.3		320	0.55		55	5
45	1	placebo	0.544444	1	0			0	8	49	90	45 08	6	0.340659	37.2	10.8		313	0.55		56	0
45	2	tofacitinib	0.705882	10	5	5mg_bid_8w	po	3	8	60	85	45 08	6	0.627907	40.2	11.2		314	0.59		54	5
45	3	tofacitinib	0.686047	10	10	10mg_bid_8w	po	3	8	59	86	45 08	6	0.453488	39.3	11.3		320	0.55		55	5
46	1	placebo	0.295455	1	0			0	2	13	44	46 02	2	0.409091	35.1	6.8	0.27	298.6	1.98		58	0
46	2	filgotinib	0.375	11	200	200mg_qd_10w	po	3	2	48	128	46 02	2	0.453846	37.4	8.8	0.3	291.3	1.42		57	5
46	1	placebo	0.318182	1	0			0	4	14	44	46 04	4	0.409091	35.1	6.8	0.27	298.6	1.98		58	0
46	2	filgotinib	0.40625	11	200	200mg_qd_10w	po	3	4	52	128	46 04	4	0.453846	37.4	8.8	0.3	291.3	1.42		57	5
46	1	placebo	0.5	1	0			0	6	22	44	46 06	5	0.409091	35.1	6.8	0.27	298.6	1.98		58	0
46	2	filgotinib	0.585938	11	200	200mg_qd_10w	po	3	6	75	128	46 06	5	0.453846	37.4	8.8	0.3	291.3	1.42		57	5
46	1	placebo	0.409091	1	0			0	10	18	44	46 1	7	0.409091	35.1	6.8	0.27	298.6	1.98		58	0
46	2	filgotinib	0.59375	11	200	200mg_qd_10w	po	3	10	76	128	46 1	7	0.453846	37.4	8.8	0.3	291.3	1.42		57	5
51	1	placebo	0.130435	1	0			0	2	9	69	51 02	2	0.449275	38.4	10		320.7	2.04		68	0
51	2	PF-04236921	0.169231	13	10	10mg_0,4w	sc	1	2	11	65	51 02	2	0.492537	38.9	11		319.9	1.64		65	3
51	3	PF-04236921	0.126761	13	50	50mg_0,4w	sc	1	2	9	71	51 02	2	0.380282	38.9	9.8		296.7	2.11		66	3
51	4	PF-04236921	0.125	13	200	200mg_0,4w	sc	1	2	5	40	51 02	2	0.375	42.2	11.5		337.4	3.22		67	3
51	1	placebo	0.130435	1	0			0	4	9	69	51 04	4	0.449275	38.4	10		320.7	2.04		68	0
51	2	PF-04236921	0.184615	13	10	10mg_0,4w	sc	1	4	12	65	51 04	4	0.492537	38.9	11		319.9	1.64		65	3
51	3	PF-04236921	0.267606	13	50	50mg_0,4w	sc	1	4	19	71	51 04	4	0.380282	38.9	9.8		296.7	2.11		66	3
51	4	PF-04236921	0.225	13	200	200mg_0,4w	sc	1	4	9	40	51 04	4	0.375	42.2	11.5		337.4	3.22		67	3
51	1	placebo	0.144928	1	0			0	6	10	69	51 06	5	0.449275	38.4	10		320.7	2.04		68	0
51	2	PF-04236921	0.292308	13	10	10mg_0,4w	sc	1	6	19	65	51 06	5	0.492537	38.9	11		319.9	1.64		65	3
51	3	PF-04236921	0.323944	13	50	50mg_0,4w	sc	1	6	23	71	51 06	5	0.380282	38.9	9.8		296.7	2.11		66	3
51	4	PF-04236921	0.225	13	200	200mg_0,4w	sc	1	6	9	40	51 06	5	0.375	42.2	11.5		337.4	3.22		67	3
51	1	placebo	0.246377	1	0			0	8	17	69	51 08	6	0.449275	38.4	10		320.7	2.04		68	0
51	2	PF-04236921	0.261538	13	10	10mg_0,4w	sc	1	8	17	65	51 08	6	0.492537	38.9	11		319.9	1.64		65	3
51	3	PF-04236921	0.380282	13	50	50mg_0,4w	sc	1	8	27	71	51 08	6	0.380282	38.9	9.8		296.7	2.11		66	3
51	4	PF-04236921	0.175	13	200	200mg_0,4w	sc	1	8	7	40	51 08	6	0.375	42.2	11.5		337.4	3.22		67	3
51	1	placebo	0.217391	1	0			0	10	15	69	51 1	7	0.449275	38.4	10		320.7	2.04		68	0
51	2	PF-04236921	0.292308	13	10	10mg_0,4w	sc	1	10	19	65	51 1	7	0.492537	38.9	11		319.9	1.64		65	3
51	3	PF-04236921	0.380282	13	50	50mg_0,4w	sc	1	10	27	71	51 1	7	0.380282	38.9	9.8		296.7	2.11		66	3
51	4	PF-04236921	0.3	13	200	200mg_0,4w	sc	1	10	12	40	51 1	7	0.375	42.2	11.5		337.4	3.22		67	3
51	1	placebo	0.217391	1	0			0	12	15	69	51 12	8	0.449275	38.4	10		320.7	2.04		68	0
51	2	PF-04236921	0.323077	13	10	10mg_0,4w	sc	1	12	21	65	51 12	8	0.492537	38.9	11		319.9	1.64		65	3
51	3	PF-04236921	0.366197	13	50	50mg_0,4w	sc	1	12	26	71	51 12	8	0.380282	38.9	9.8		296.7	2.11		66	3
51	4	PF-04236921	0.275	13	200	200mg_0,4w	sc	1	12	11	40	51 12	8	0.375	42.2	11.5		337.4	3.22		67	3
52	1	placebo	0.183333	1	0			0	2	11	60	52 02	2	0.52381	34.4	11.5	0.302	313.1	1.89		72	0
52	2	PF-00547659	0.1875	19	22.5	22.5mg_q4w_0-8w	sc	1	2	12	64	52 02	2	0.272727	37.3	12.7	0.333	307.4	2.11		69	8
52	3	PF-00547659	0.183333	19	75	75mg_q4w_0-8w	sc	1	2	11	60	52 02	2	0.461538	34.4	11.4	0.323	324.1	1.46		70	8
52	4	PF-00547659	0.206349	19	225	225mg_q4w_0-8w	sc	1	2	13	63	52 02	2	0.367647	35.9	12	0.309	316.4	1.72		71	8
52	1	placebo	0.293103	1	0			0	4	17	58	52 04	4	0.52381	34.4	11.5	0.302	313.1	1.89		72	0
52	2	PF-00547659	0.293103	19	22.5	22.5mg_q4w_0-8w	sc	1	4	17	58	52 04	4	0.272727	37.3	12.7	0.333	307.4	2.11		69	8
52	3	PF-00547659	0.316667	19	75	75mg_q4w_0-8w	sc	1	4	19	60	52 04	4	0.461538	34.4	11.4	0.323	324.1	1.46		70	8
52	4	PF-00547659	0.276923	19	225	225mg_q4w_0-8w	sc	1	4	18	65	52 04	4	0.367647	35.9	12	0.309	316.4	1.72		71	8
52	1	placebo	0.396552	1	0			0	6	23	58	52 06	5	0.52381	34.4	11.5	0.302	313.1	1.89		72	0
52	2	PF-00547659	0.410714	19	22.5	22.5mg_q4w_0-8w	sc	1	6	23	56	52 06	5	0.272727	37.3	12.7	0.333	307.4	2.11		69	8
52	3	PF-00547659	0.481481	19	75	75mg_q4w_0-8w	sc	1	6	26	54	52 06	5	0.461538	34.4	11.4	0.323	324.1	1.46		70	8
52	4	PF-00547659	0.40625	19	225	225mg_q4w_0-8w	sc	1	6	26	64	52 06	5	0.367647	35.9	12	0.309	316.4	1.72		71	8
52	1	placebo	0.410714	1	0			0	8	56	52	52 08	6	0.52381	34.4	11.5	0.302	313.1	1.89		72	0
52	2	PF-00547659	0.5	19	22.5	22.5mg_q4w_0-8w	sc	1	8	50	50	52 08	6	0.272727	37.3	12.7	0.333	307.4	2.11		69	8
52	3	PF-00547659	0.490909	19	75	75mg_q4w_0-8w	sc	1	8	55	55	52 08	6	0.461538	34.4	11.4	0.323	324.1	1.46		70	8
52	4	PF-00547659	0.564516	19	225	225mg_q4w_0-8w	sc	1	8	62	62	52 08	6	0.367647	35.9	12	0.309	316.4	1.72		71	8
52	1	placebo	0.442308	1	0			0	10	23	52	52 1	7	0.52381	34.4	11.5	0.302	313.1	1.89		72	0
52	2	PF-00547659	0.54	19	22.5	22.5mg_q4w_0-8w	sc	1	10	27	50	52 1	7	0.272727	37.3	12.7	0.333	307.4	2.11		69	8
52	3	PF-00547659	0.479167	19	75	75mg_q4w_0-8w	sc	1	10	23	48	52 1	7	0.461538	34.4	11.4	0.323	324.1	1.46		70	8
52	4	PF-00547659	0.516129	19	225	225mg_q4w_0-8w	sc	1	10	32	62	52 1	7	0.367647	35.9	12	0.309	316.4	1.72		71	8
52	1	placebo	0.444	1	0			0	12	24	54	52 12	8	0.52381	34.4	11.5	0.302	313.1	1.89		72	0
52	2	PF-00547659	0.56	19	22.5	22.5mg_q4w_0-8w	sc	1	12	29	51	52 12	8	0.272727	37.3	12.7	0.333	307.4	2.11		69	8
52	3	PF-00547659	0.477	19	75	75mg_q4w_0-8w	sc	1	12	23	49	52 12	8	0.461538	34.4	11.4	0.323	324.1	1.46		70	8
52	4	PF-00547659	0.538	19	225	225mg_q4w_0-8w	sc	1	12	33	61	52 12	8	0.367647	35.9	12	0.309	316.4	1.72		71	8
53	1	placebo	0.25	1	0			0	8	15	60	53 08	6	0.383333	38.1	11.2		312.4	2.11		74	0
53	2	brazikumab	0.457627	14	700	700mg_0,4	iv	2	8	27	59	53 08	6	0.372881	34.9	13.1		325	2.98		73	3
54	1	placebo	0.27027	1	0			0	16	10	37	54 16	10	0.351351	40.5	8.7		276	0.7		80	0
54	2	upadacitinib	0.333333	15	3	3mg_bid_16w	po	3	16	13	39	54 16	10	0.512821	39.7	10.7		288	0.6		75	5
54	3	upadacitinib	0.405405	15	6	6mg_bid_16w	po	3	16	15	37	54 16	10	0.432432	40.5	8.8		296	1.17		76	5
54	4	upadacitinib	0.444444	15	12	12mg_bid_16w	po	3	16	16	36	54 16	10	0.527778	40.8	9.1		280	1.66		77	5
54	5	upadacitinib	0.314286	15	12	24mg_qd_16w	po	3	16	11	35	54 16	10	0.457143	40.2	10.8		305	0.74		79	5
54	6	upadacitinib	0.555556	15	24	24mg_bid_16w	po	3	16	20	36	54 16	10	0.305556	42.5	14.1		277.5	0.59		78	5
55	1	placebo	0.325581	1	0			0	4	14	43	55 04	4	0.372093	39	6.7	0.3	303			83	0
55	2	fontolizumab	0.377778	16	280	4mg/kg_0,4w	iv	2	4	17	45	55 04	4	0.355556	43	6.4	0.27	300			81	9
55	3	fontolizumab	0.422222	16	280	10mg/kg_0,4w	iv	2	4	19	45	55 04	4	0.488889	39	7.4	0.18	303			82	9
55	1	placebo	0.384615	1	0			0	6	10	26	55 06	5	0.372093	39	6.7	0.3	303			83	0
55	2	fontolizumab	0.59375	16	280	4mg/kg_0,4w	iv	2	6	19	32	55 06	5	0.355556	43	6.4	0.27	300			81	9
55	3	fontolizumab	0.645161	16	280	10mg/kg_0,4w	iv	2	6	20	31	55 06	5	0.488889	39	7.4	0.18	303			82	9
55	1	placebo	0.346154	1	0			0	8	9	26	55 08	6	0.372093	39	6.7	0.3	303			83	0
55	2	fontolizumab	0.6875	16	280	4mg/kg_0,4w	iv	2	8	22	32	55 08	6	0.355556	43	6.4	0.27	300			81	9
55	3	fontolizumab	0.666667	16	280	10mg/kg_0,4w	iv	2	8	20	30	55 08	6	0.488889	39	7.4	0.18	303			82	9
56	1	placebo	0.375	1	0			0	4	15	40	56 04	4	0.375	36	7.9	0.5	324.05	1.75	128.3	88	0
56	2	fontolizumab	0.375	16	70	1mg/kg_0 0.1mg/kg_4,8,12w	iv-sc	4	4	15	40	56 04	4	0.487805	33	9.1	0.37	327.01	2.93	122.4	84	9
56	3	fontolizumab	0.384615	16	70	1mg/kg_0 1mg/kg_4,8,12w	iv-sc	4	4	15	39	56 04	4	0.475	34.5	10.8	0.28	323.24	2.05	128.7	85	9
56	4	fontolizumab	0.358974	16	280	4mg/kg_0 0.1mg/kg_4,8,12w	iv-sc	4	4	14	39	56 04	4	0.5	34.5	10	0.4	312.57	1.87	131.5	86	9
56	5	fontolizumab	0.307692	16	280	4mg/kg_0 1mg/kg_4,8,12w	iv-sc	4	4	12	39	56 04	4	0.425	34	8.4	0.32	329.44	1.57	119.5	87	9
56	1	placebo	0.487179	1	0			0	6	19	39	56 06	5	0.375	36	7.9	0.5	324.05	1.75	128.3	88	0
56	2	fontolizumab	0.275	16	70	1mg/kg_0 0.1mg/kg_4,8,12w	iv-sc	4	6	11	40	56 06	5	0.487805	33	9.1	0.37	327.01	2.93	122.4	84	9
56	3	fontolizumab	0.657895	16	70	1mg/kg_0 1mg/kg_4,8,12w	iv-sc	4	6	25	38	56 06	5	0.475	34.5	10.8	0.28	323.24	2.05	128.7	85	9
56	4	fontolizumab	0.5	16	280	4mg/kg_0 0.1mg/kg_4,8,12w	iv-sc	4	6	20	40	56 06	5	0.5	34.5	10	0.4	312.57	1.87	131.5	86	9
56	5	fontolizumab	0.457143	16	280	4mg/kg_0 1mg/kg_4,8,12w	iv-sc	4	6	16	35	56 06	5	0.425	34	8.4	0.32	329.44	1.57	119.5	87	9
56	1	placebo	0.358974	1	0			0	8	14	39	56 08	6	0.375	36	7.9	0.5	324.05	1.75	128.3	88	0
56	2	fontolizumab	0.317073	16	70	1mg/kg_0 0.1mg/kg_4,8,12w	iv-sc	4	8	13	41	56 08	6	0.487805	33	9.1	0.37	327.01	2.93	122.4	84	9
56	3	fontolizumab	0.648649	16	70	1mg/kg_0 1mg/kg_4,8,12w	iv-sc	4	8	24	37	56 08	6	0.475	34.5	10.8	0.28	323.24	2.05	128.7	85	9
56	4	fontolizumab	0.512821	16	280	4mg/kg_0 0.1mg/kg_4,8,12w	iv-sc	4	8	20	39	56 08	6	0.5	34.5	10	0.4	312.57	1.87	131.5	86	9
56	5	fontolizumab	0.527778	16	280	4mg/kg_0 1mg/kg_4,8,12w	iv-sc	4	8	19	36	56 08	6	0.425	34	8.4	0.32	329.44	1.57	119.5	87	9
56	1	placebo	0.384615	1	0			0	12	15	39	56 12	8	0.375	36	7.9	0.5	324.05	1.75	128.3	88	0
56	2	fontolizumab	0.4	16	70	1mg/kg_0 0.1mg/kg_4,8,12w	iv-sc	4	12	16	40	56 12	8	0.487805	33	9.1	0.37	327.01	2.93	122.4	84	9
56	3	fontolizumab	0.564103	16	70	1mg/kg_0 1mg/kg_4,8,12w	iv-sc	4	12	22	39	56 12	8	0.475	34.5	10.8	0.28	323.24	2.05	128.7	85	9
56	4	fontolizumab	0.538462	16	280	4mg/kg_0 0.1mg/kg_4,8,12w	iv-sc	4	12	21	39	56 12	8	0.5	34.5	10	0.4	312.57	1.87	131.5	86	9
56	5	fontolizumab	0.527778	16	280	4mg/kg_0 1mg/kg_4,8,12w	iv-sc	4	12	19	36	56 12	8	0.425	34	8.4	0.32	329.44	1.57	119.5	87	9
56	1	placebo	0.368421	1	0			0	16	14	38	56 16	10	0.375	36	7.9	0.5	324.05	1.75	128.3	88	0
56	2	fontolizumab	0.384615	16	70	1mg/kg_0 0.1mg/kg_4,8,12w	iv-sc	4	16	15	39	56 16	10	0.487805	33	9.1	0.37	327.01	2.93	122.4	84	9
56	3	fontolizumab	0.621622	16	70	1mg/kg_0 1mg/kg_4,8,12w	iv-sc	4	16	23	37	56 16	10	0.475	34.5	10.8	0.28	323.24	2.05	128.7	85	9
56	4	fontolizumab	0.473684	16	280	4mg/kg_0 0.1mg/kg_4,8,12w	iv-sc	4	16	18	38	56 16	10	0.5	34.5	10	0.4	312.57	1.87	131.5	86	9
56	5	fontolizumab	0.454545	16	280	4mg/kg_0 1mg/kg_4,8,12w	iv-sc	4	16	15	33	56 16	10	0.425	34	8.4	0.32	329.44	1.57	119.5	87	9
56	1	placebo	0.289474	1	0			0	28	11	38	56 28	15	0.375	36	7.9	0.5	324.05	1.75	128.3	88	0
56	2	fontolizumab	0.307692	16	70	1mg/kg_0 0.1mg/kg_4,8,12w	iv-sc	4	28	12	39	56 28	15	0.487805	33	9.1	0.37	327.01	2.93	122.4	84	9
56	3	fontolizumab	0.4	16	70	1mg/kg_0 1mg/kg_4,8,12w	iv-sc	4	28	14	35	56 28	15	0.475	34.5	10.8	0.28	323.24	2.05	128.7	85	9
56	4	fontolizumab	0.384615	16	280	4mg/kg_0 0.1mg/kg_4,8,12w	iv-sc	4	28	15	39	56 28	15	0.5	34.5	10	0.4	312.57	1.87	131.5	86	9
56	5	fontolizumab	0.3125	16	280	4mg/kg_0 1mg/kg_4,8,12w	iv-sc	4	28	10	32	56 28	15	0.425	34	8.4	0.32	329.44	1.57	119.5	87	9
58	1	placebo	0.402778	1	0			0	4	58	144	58 04	4	0.42	36.6	6	0.33	329.9	3.08		89	0
58	2	vercirnon	0.408163	17	250	250mg_qd	po	3	4	40	98	58 04	4	0.47	37.2	6	0.25	340.1	2.8		90	10
58	3	vercirnon	0.416667	17	500	250mg_bid	po	3	4	40	96	58 04	4	0.45	37.3	5	0.37	323.3	2.76		91	10
58	4	vercirnon	0.412371	17	500	500mg_qd	po	3	4	40	97	58 04	4	0.51	34.9	6	0.3	332.5	3.03		92	10
58	1	placebo	0.423611	1	0			0	8	61	144	58 08	6	0.42	36.6	6	0.33	329.9	3.08		89	0
58	2	vercirnon	0.408163	17	250	250mg_qd	po	3	8	40	98	58 08	6	0.47	37.2	6	0.25	340.1	2.8		90	10
58	3	vercirnon	0.4375	17	500	250mg_bid	po	3	8	42	96	58 08	6	0.45	37.3	5	0.37	323.3	2.76		91	10
58	4	vercirnon	0.484536	17	500	500mg_qd	po	3	8	47	97	58 08	6	0.51	34.9	6	0.3	332.5	3.03		92	10
58	1	placebo	0.402778	1	0			0	12	58	144	58 12	8	0.42	36.6	6	0.33	329.9	3.08		89	0
58	2	vercirnon	0.479592	17	250	250mg_qd	po	3	12	47	98	58 12	8	0.47	37.2	6	0.25	340.1	2.8		90	10
58	3	vercirnon	0.416667	17	500	250mg_bid	po	3	12	40	96	58 12	8	0.45	37.3	5	0.37	323.3	2.76		91	10
58	4	vercirnon	0.546392	17	500	500mg_qd	po	3	12	53	97	58 12	8	0.51	34.9	6	0.3	332.5	3.03		92	10
61	1	placebo	0.241379	1	0			0	8	49	203	61 08	6	0.493	36.1	9.5	0.248	313.7	1.22		93	0
61	2	vercirnon	0.261084	17	500	500mg_qd	po	3	8	53	203	61 08	6	0.36	37	10.7	0.266	314.6	1.35		94	10
61	3	vercirnon	0.247525	17	1000	500mg_bid	po	3	8	50	202	61 08	6	0.475	35.9	10.2	0.248	321.8	1.49		95	10
61	1	placebo	0.251232	1	0			0	12	51	203	61 12	8	0.493	36.1	9.5	0.248	313.7	1.22		93	0
61	2	vercirnon	0.275862	17	500	500mg_qd	po	3	12	56	203	61 12	8	0.36	37	10.7	0.266	314.6	1.35		94	10
61	3	vercirnon	0.272277	17	1000	500mg_bid	po	3	12	55	202	61 12	8	0.475	35.9	10.2	0.248	321.8	1.49		95	10
62	1	placebo	0.079	1	0			0	1	5	63	62 01	1	0.571	35.1			311.2	2.13		96	0
62	2	laquinimod	0.1698	18	0.5	0.5mg_qd	po	3	1	5	29	62 01	1	0.448	39.6			288.3	1.71		97	7
62	3	laquinimod	0.0861	18	1	1.0mg_qd	po	3	1	3	30	62 01	1	0.433	38.2			291.9	0.67		98	7
62	4	laquinimod	0.03	18	1.5	1.5mg_qd	po	3	1	1	29	62 01	1	0.276	40.9			297.8	1.51		99	7
62	5	laquinimod	0.0995	18	2	2.0mg_qd_	po	3	1	3	29	62 01	1	0.414	37.4			313.2	0.65		100	7
62	1	placebo	0.2205	1	0			0	2	14	63	62 02	2	0.571	35.1			311.2	2.13		96	0
62	2	laquinimod	0.377	18	0.5	0.5mg_qd	po	3	2	11	29	62 02	2	0.448	39.6			288.3	1.71		97	7
62	3	laquinimod	0.1658	18	1	1.0mg_qd	po	3	2	5	30	62 02	2	0.433	38.2			291.9	0.67		98	7
62	4	laquinimod	0.1698	18	1.5	1.5mg_qd	po	3	2	5	29	62 02	2	0.276	40.9			297.8	1.51		99	7
62	5	laquinimod	0.2016	18	2	2.0mg_qd_	po	3	2	6	29	62 02	2	0.414	37.4			313.2	0.65		100	7
62	1	placebo	0.271	1	0			0	4	17	63	62 04	4	0.571	35.1			311.2	2.13		96	0
62	2	laquinimod	0.452	18	0.5	0.5mg_qd	po	3	4	13	29	62 04	4	0.448	39.6			288.3	1.71		97	7
62	3	laquinimod	0.2971	18	1	1.0mg_qd	po	3	4	9	30	62 04	4	0.433	38.2			291.9	0.67		98	7
62	4	laquinimod	0.2387	18	1.5	1.5mg_qd	po	3	4	7	29	62 04	4	0.276	40.9			297.8	1.51		99	7
62	5	laquinimod	0.2395	18	2	2.0mg_qd_	po	3	4	7	29	62 04	4	0.414	37.4			313.2	0.65		100	7
62	1	placebo	0.2371	1	0			0	6	15	63	62 06	5	0.571	35.1			311.2	2.13		96	0
62	2	laquinimod	0.6227	18	0.5	0.5mg_qd	po	3	6	18	29	62 06	5	0.448	39.6			288.3	1.71		97	7
62	3	laquinimod	0.3991	18	1	1.0mg_qd	po	3	6	12	30	62 06	5	0.433	38.2			291.9	0.67		98	7
62	4	laquinimod	0.3081	18	1.5	1.5mg_qd	po	3	6	9	29	62 06	5	0.276	40.9			297.8	1.51		99	7
62	5	laquinimod	0.2079	18	2	2.0mg_qd_	po	3	6	6	29	62 06	5	0.414	37.4			313.2	0.65		100	7
62	1	placebo	0.3199	1	0			0	8	20	63	62 08	6	0.571	35.1			311.2	2.13		96	0
62	2	laquinimod	0.5541	18	0.5	0.5mg_qd	po	3	8	16	29	62 08	6	0.448	39.6			288.3	1.71		97	7
62	3	laquinimod	0.3983	18	1	1.0mg_qd	po	3	8	12	30	62 08	6	0.433	38.2			291.9	0.67		98	7
62	4	laquinimod	0.2695	18	1.5	1.5mg_qd	po	3	8	8	29	62 08	6	0.276	40.9			297.8	1.51		99	7
62	5	laquinimod	0.2726	18	2	2.0mg_qd_	po	3	8	8	29	62 08	6	0.414	37.4			313.2	0.65		100	7
62	1	placebo	0.286	1	0			0	12	18	63	62 12	8	0.571	35.1			311.2	2.13		96	0
62	2	laquinimod	0.5556	18	0.5	0.5mg_qd	po	3	12	16	29	62 12	8	0.448	39.6			288.3	1.71		97	7
62	3	laquinimod	0.4331	18	1	1.0mg_qd	po	3	12	13	30	62 12	8	0.433	38.2			291.9	0.67		98	7
62	4	laquinimod	0.3113	18	1.5	1.5mg_qd	po	3	12	9	29	62 12	8	0.276	40.9			297.8	1.51		99	7
62	5	laquinimod	0.2773	18	2	2.0mg_qd_	po	3	12	8	29	62 12	8	0.414	37.4			313.2	0.65		100	7

## Sheet: CDAI-70
trialNO	armNO	treatment	cdai70	FLAG	DOSE	Regimen	method	methodFlag	week	event	no	group.week	tp	male	age	dur	smok	CDAI	CRP	IBDQ	group	CLASS
1	1	placebo	0.166667	1	0			0	2	4	24	1 02	2	0.6	38.5	10.4		288	1.28	128	1	0
1	2	Infliximab	0.769231	2	350	5mg/kg	iv	2	2	20	26	1 02	2	0.52	37	12.5		312	2.21	122	2	1
7	1	placebo	0.341176	1	0			0	2	58	170	7 02	2	0.529	35	2.4	35.3			122.1	5	0
7	2	Infliximab	0.633136	2	350	5mg/kg_0,2,6,14,22	iv	2	2	107	169	7 02	2	0.521	34	2.2	38.5			125.3	6	1
7	1	placebo	0.447059	1	0			0	6	76	170	7 06	5	0.529	35	2.4	35.3			122.1	5	0
7	2	Infliximab	0.739645	2	350	5mg/kg_0,2,6,14,22	iv	2	6	125	169	7 06	5	0.521	34	2.2	38.5			125.3	6	1
7	1	placebo	0.452941	1	0			0	10	77	170	7 1	7	0.529	35	2.4	35.3			122.1	5	0
7	2	Infliximab	0.763314	2	350	5mg/kg_0,2,6,14,22	iv	2	10	129	169	7 1	7	0.521	34	2.2	38.5			125.3	6	1
7	1	placebo	0.452941	1	0			0	18	77	170	7 18	11	0.529	35	2.4	35.3			122.1	5	0
7	2	Infliximab	0.698225	2	350	5mg/kg_0,2,6,14,22	iv	2	18	118	169	7 18	11	0.521	34	2.2	38.5			125.3	6	1
7	1	placebo	0.417647	1	0			0	26	71	170	7 26	14	0.529	35	2.4	35.3			122.1	5	0
7	2	Infliximab	0.668639	2	350	5mg/kg_0,2,6,14,22	iv	2	26	113	169	7 26	14	0.521	34	2.2	38.5			125.3	6	1
9	1	placebo	0.301587	1	0			0	2	19	63	9 02	2	0.48	34	8.9		300		130	7	0
9	2	natalizumab	0.455882	3	210	3mg/kg	iv	2	2	31	68	9 02	2	0.4	36	8.4		288		130	8	2
9	3	natalizumab	0.545455	3	210	3mg/kg_0,4	iv	2	2	36	66	9 02	2	0.45	36	8.1		300		136	9	2
9	4	natalizumab	0.431373	3	420	6mg/kg_0,4	iv	2	2	22	51	9 02	2	0.49	35	7.8		298		123	10	2
9	1	placebo	0.285714	1	0			0	4	18	63	9 04	4	0.48	34	8.9		300		130	7	0
9	2	natalizumab	0.470588	3	210	3mg/kg	iv	2	4	32	68	9 04	4	0.4	36	8.4		288		130	8	2
9	3	natalizumab	0.621212	3	210	3mg/kg_0,4	iv	2	4	41	66	9 04	4	0.45	36	8.1		300		136	9	2
9	4	natalizumab	0.529412	3	420	6mg/kg_0,4	iv	2	4	27	51	9 04	4	0.49	35	7.8		298		123	10	2
9	1	placebo	0.380952	1	0			0	6	24	63	9 06	5	0.48	34	8.9		300		130	7	0
9	3	natalizumab	0.712121	3	210	3mg/kg_0,4	iv	2	6	47	66	9 06	5	0.45	36	8.1		300		136	9	2
9	4	natalizumab	0.568627	3	420	6mg/kg_0,4	iv	2	6	29	51	9 06	5	0.49	35	7.8		298		123	10	2
9	1	placebo	0.349206	1	0			0	8	22	63	9 08	6	0.48	34	8.9		300		130	7	0
9	3	natalizumab	0.666667	3	210	3mg/kg_0,4	iv	2	8	44	66	9 08	6	0.45	36	8.1		300		136	9	2
9	4	natalizumab	0.54902	3	420	6mg/kg_0,4	iv	2	8	28	51	9 08	6	0.49	35	7.8		298		123	10	2
9	1	placebo	0.428571	1	0			0	12	27	63	9 12	8	0.48	34	8.9		300		130	7	0
9	3	natalizumab	0.606061	3	210	3mg/kg_0,4	iv	2	12	40	66	9 12	8	0.45	36	8.1		300		136	9	2
9	4	natalizumab	0.647059	3	420	6mg/kg_0,4	iv	2	12	33	51	9 12	8	0.49	35	7.8		298		123	10	2
10	1	placebo	0.325967	1	0			0	2	59	181	10 02	2	0.4	39	9.167	24	303	2.3		11	0
10	2	natalizumab	0.396409	3	300	300mg_0,4,8	iv	2	2	287	724	10 02	2	0.43	38	10.083	23	302	2		12	2
10	1	placebo	0.447514	1	0			0	4	81	181	10 04	4	0.4	39	9.167	24	303	2.3		11	0
10	2	natalizumab	0.512431	3	300	300mg_0,4,8	iv	2	4	371	724	10 04	4	0.43	38	10.083	23	302	2		12	2
10	1	placebo	0.524862	1	0			0	6	95	181	10 06	5	0.4	39	9.167	24	303	2.3		11	0
10	2	natalizumab	0.584254	3	300	300mg_0,4,8	iv	2	6	423	724	10 06	5	0.43	38	10.083	23	302	2		12	2
10	1	placebo	0.502762	1	0			0	8	91	181	10 08	6	0.4	39	9.167	24	303	2.3		11	0
10	2	natalizumab	0.566298	3	300	300mg_0,4,8	iv	2	8	410	724	10 08	6	0.43	38	10.083	23	302	2		12	2
10	1	placebo	0.486188	1	0			0	10	88	181	10 1	7	0.4	39	9.167	24	303	2.3		11	0
10	2	natalizumab	0.564917	3	300	300mg_0,4,8	iv	2	10	409	724	10 1	7	0.43	38	10.083	23	302	2		12	2
10	1	placebo	0.508287	1	0			0	12	92	181	10 12	8	0.4	39	9.167	24	303	2.3		11	0
10	2	natalizumab	0.61326	3	300	300mg_0,4,8	iv	2	12	444	724	10 12	8	0.43	38	10.083	23	302	2		12	2
11	1	placebo	0.372	1	0			0	4	93	250	11 04	4	0.41	37.7	10.025	19	299.5	2.34	123.6	13	0
11	2	natalizumab	0.509653	3	300	300mg_0,4,8	iv	2	4	132	259	11 04	4	0.41	37.6	10.17	22	303.9	2.3	122.5	14	2
11	1	placebo	0.4	1	0			0	8	100	250	11 08	6	0.41	37.7	10.025	19	299.5	2.34	123.6	13	0
11	2	natalizumab	0.559846	3	300	300mg_0,4,8	iv	2	8	145	259	11 08	6	0.41	37.6	10.17	22	303.9	2.3	122.5	14	2
11	1	placebo	0.44	1	0			0	12	110	250	11 12	8	0.41	37.7	10.025	19	299.5	2.34	123.6	13	0
11	2	natalizumab	0.598456	3	300	300mg_0,4,8	iv	2	12	155	259	11 12	8	0.41	37.6	10.17	22	303.9	2.3	122.5	14	2
16	1	placebo	0.25	1	0			0	2	33	132	16 02	2	0.326	37.7	8.4		300	0.75	124	15	0
16	2	CDP571	0.444867	4	700	10mg/kg_q8w_0-24w	iv	2	2	117	263	16 02	2	0.399	37.9	9.1		293	0.665	129	16	1
16	1	placebo	0.325758	1	0			0	4	43	132	16 04	4	0.326	37.7	8.4		300	0.75	124	15	0
16	2	CDP571	0.418251	4	700	10mg/kg_q8w_0-24w	iv	2	4	110	263	16 04	4	0.399	37.9	9.1		293	0.665	129	16	1
16	1	placebo	0.393939	1	0			0	8	52	132	16 08	6	0.326	37.7	8.4		300	0.75	124	15	0
16	2	CDP571	0.368821	4	700	10mg/kg_q8w_0-24w	iv	2	8	97	263	16 08	6	0.399	37.9	9.1		293	0.665	129	16	1
16	1	placebo	0.371212	1	0			0	12	49	132	16 12	8	0.326	37.7	8.4		300	0.75	124	15	0
16	2	CDP571	0.429658	4	700	10mg/kg_q8w_0-24w	iv	2	12	113	263	16 12	8	0.399	37.9	9.1		293	0.665	129	16	1
16	1	placebo	0.295455	1	0			0	16	39	132	16 16	10	0.326	37.7	8.4		300	0.75	124	15	0
16	2	CDP571	0.361217	4	700	10mg/kg_q8w_0-24w	iv	2	16	95	263	16 16	10	0.399	37.9	9.1		293	0.665	129	16	1
16	1	placebo	0.356061	1	0			0	24	47	132	16 24	13	0.326	37.7	8.4		300	0.75	124	15	0
16	2	CDP571	0.346008	4	700	10mg/kg_q8w_0-24w	iv	2	24	91	263	16 24	13	0.399	37.9	9.1		293	0.665	129	16	1
16	1	placebo	0.272727	1	0			0	28	36	132	16 28	15	0.326	37.7	8.4		300	0.75	124	15	0
16	2	CDP571	0.361217	4	700	10mg/kg_q8w	iv	2	28	95	263	16 28	15	0.399	37.9	9.1		293	0.665	129	16	1
17	1	placebo	0.25	1	0			0	2	5	20	17 02	2	0.5	39.3			266.1		121.4	17	0
17	2	etanercept	0.478261	5	25	25mg_biw_8w	sc	1	2	11	23	17 02	2	0.696	37.4			299.5		124.4	18	1
17	1	placebo	0.45	1	0			0	4	9	20	17 04	4	0.5	39.3			266.1		121.4	17	0
17	2	etanercept	0.391304	5	25	25mg_biw_8w	sc	1	4	9	23	17 04	4	0.696	37.4			299.5		124.4	18	1
17	1	placebo	0.3	1	0			0	8	6	20	17 08	6	0.5	39.3			266.1		121.4	17	0
17	2	etanercept	0.304348	5	25	25mg_biw_8w	sc	1	8	7	23	17 08	6	0.696	37.4			299.5		124.4	18	1
20	1	placebo	0.28125	1	0			0	2	9	32	20 02	2	0.813	30.6						19	0
20	2	certolizumab	0.466667	6	200	200mg_q2w_0-4w	sc	1	2	14	30	20 02	2	0.833	32.7						20	1
20	3	certolizumab	0.451613	6	400	400mg_q2w_0-4w	sc	1	2	14	31	20 02	2	0.688	31.4						21	1
20	1	placebo	0.25	1	0			0	4	8	32	20 04	4	0.813	30.6						19	0
20	2	certolizumab	0.566667	6	200	200mg_q2w_0-4w	sc	1	4	17	30	20 04	4	0.833	32.7						20	1
20	3	certolizumab	0.566667	6	400	400mg_q2w_0-4w	sc	1	4	17	30	20 04	4	0.688	31.4						21	1
20	1	placebo	0.4375	1	0			0	6	14	32	20 06	5	0.813	30.6						19	0
20	2	certolizumab	0.533333	6	200	200mg_q2w_0-4w	sc	1	6	16	30	20 06	5	0.833	32.7						20	1
20	3	certolizumab	0.612903	6	400	400mg_q2w_0-4w	sc	1	6	19	31	20 06	5	0.688	31.4						21	1
23	1	placebo	0.25	1	0			0	2	82	328	23 02	2	0.399	38	8	33	284.3	0.902		22	0
23	2	certolizumab	0.350453	6	400	400mg_0,2,4,q4w_8-26w	sc	1	2	116	331	23 02	2	0.4743	37	7	31	284.7	0.82		23	1
23	1	placebo	0.329268	1	0			0	4	108	328	23 04	4	0.399	38	8	33	284.3	0.902		22	0
23	2	certolizumab	0.441088	6	400	400mg_0,2,4,q4w_8-26w	sc	1	4	146	331	23 04	4	0.4743	37	7	31	284.7	0.82		23	1
23	1	placebo	0.381098	1	0			0	6	125	328	23 06	5	0.399	38	8	33	284.3	0.902		22	0
23	2	certolizumab	0.459215	6	400	400mg_0,2,4,q4w_8-26w	sc	1	6	152	331	23 06	5	0.4743	37	7	31	284.7	0.82		23	1
23	1	placebo	0.390244	1	0			0	8	128	328	23 08	6	0.399	38	8	33	284.3	0.902		22	0
23	2	certolizumab	0.429003	6	400	400mg_0,2,4,q4w_8-26w	sc	1	8	142	331	23 08	6	0.4743	37	7	31	284.7	0.82		23	1
23	1	placebo	0.368902	1	0			0	12	121	328	23 12	8	0.399	38	8	33	284.3	0.902		22	0
23	2	certolizumab	0.459215	6	400	400mg_0,2,4,q4w_8-26w	sc	1	12	152	331	23 12	8	0.4743	37	7	31	284.7	0.82		23	1
23	1	placebo	0.368902	1	0			0	16	121	328	23 16	10	0.399	38	8	33	284.3	0.902		22	0
23	2	certolizumab	0.459215	6	400	400mg_0,2,4,q4w_8-26w	sc	1	16	152	331	23 16	10	0.4743	37	7	31	284.7	0.82		23	1
23	1	placebo	0.310976	1	0			0	20	102	328	23 2	12	0.399	38	8	33	284.3	0.902		22	0
23	2	certolizumab	0.41994	6	400	400mg_0,2,4,q4w_8-26w	sc	1	20	139	331	23 2	12	0.4743	37	7	31	284.7	0.82		23	1
23	1	placebo	0.310976	1	0			0	24	102	328	23 24	13	0.399	38	8	33	284.3	0.902		22	0
23	2	certolizumab	0.41994	6	400	400mg_0,2,4,q4w_8-26w	sc	1	24	139	331	23 24	13	0.4743	37	7	31	284.7	0.82		23	1
23	1	placebo	0.289634	1	0			0	26	95	328	23 26	14	0.399	38	8	33	284.3	0.902		22	0
23	2	certolizumab	0.429003	6	400	400mg_0,2,4,q4w_8-26w	sc	1	26	142	331	23 26	14	0.4743	37	7	31	284.7	0.82		23	1
26	1	placebo	0.243243	1	0			0	1	18	74	26 01	1	0.527027	37		38	295.7	0.9	126.9	24	0
26	2	adalimumab	0.364865	7	40	40mg_0 20mg_2	sc	1	1	27	74	26 01	1	0.527027	39		34	298	0.9	129.9	25	1
26	3	adalimumab	0.4	7	80	80mg_0 40mg_2	sc	1	1	30	75	26 01	1	0.333333	38		43	300.7	0.9	126.9	26	1
26	4	adalimumab	0.315789	7	160	160mg_0 80mg_2	sc	1	1	24	76	26 01	1	0.473684	39		42	295.4	0.7	125.1	27	1
26	1	placebo	0.297297	1	0			0	2	22	74	26 02	2	0.527027	37		38	295.7	0.9	126.9	24	0
26	2	adalimumab	0.445946	7	40	40mg_0 20mg_2	sc	1	2	33	74	26 02	2	0.527027	39		34	298	0.9	129.9	25	1
26	3	adalimumab	0.546667	7	80	80mg_0 40mg_2	sc	1	2	41	75	26 02	2	0.333333	38		43	300.7	0.9	126.9	26	1
26	4	adalimumab	0.447368	7	160	160mg_0 80mg_2	sc	1	2	34	76	26 02	2	0.473684	39		42	295.4	0.7	125.1	27	1
26	1	placebo	0.364865	1	0			0	4	27	74	26 04	4	0.527027	37		38	295.7	0.9	126.9	24	0
26	2	adalimumab	0.540541	7	40	40mg_0 20mg_2	sc	1	4	40	74	26 04	4	0.527027	39		34	298	0.9	129.9	25	1
26	3	adalimumab	0.586667	7	80	80mg_0 40mg_2	sc	1	4	44	75	26 04	4	0.333333	38		43	300.7	0.9	126.9	26	1
26	4	adalimumab	0.592105	7	160	160mg_0 80mg_2	sc	1	4	45	76	26 04	4	0.473684	39		42	295.4	0.7	125.1	27	1
28	1	placebo	0.304348	1	0			0	4	7	23	28 04	4	0.695652	30.4	7.9	26.1	308.1	2.5	139.4	28	0
28	2	adalimumab	0.588235	7	80	80mg_0 40mg_2	sc	1	4	20	34	28 04	4	0.470588	30.6	9.2	44.1	302.7	3	148.6	29	1
28	3	adalimumab	0.69697	7	160	160mg_0 80mg_2	sc	1	4	23	33	28 04	4	0.606061	32	11	33.3	300.5	2.2	145.9	30	1
29	1	placebo	0.204819	1	0			0	1	34	166	29 01	1	0.470588	30.6	9.2	44.1	302.7	3	148.6	31	0
29	2	adalimumab	0.345912	7	160	160mg_0 80mg_2	sc	1	1	55	159	29 01	1	0.606061	32	11	33.3	300.5	2.2	145.9	32	1
29	1	placebo	0.325301	1	0			0	2	54	166	29 02	2	0.470588	30.6	9.2	44.1	302.7	3	148.6	31	0
29	2	adalimumab	0.522013	7	160	160mg_0 80mg_2	sc	1	2	83	159	29 02	2	0.606061	32	11	33.3	300.5	2.2	145.9	32	1
29	1	placebo	0.337349	1	0			0	4	56	166	29 04	4	0.470588	30.6	9.2	44.1	302.7	3	148.6	31	0
29	2	adalimumab	0.515723	7	160	160mg_0 80mg_2	sc	1	4	82	159	29 04	4	0.606061	32	11	33.3	300.5	2.2	145.9	32	1
31	1	placebo	0.223301	1	0			0	2	23	103	31 02	2	0.709	32.6			274.71	2.712		33	0
31	2	adalimumab	0.441176	7	160	160mg_0 80mg_2 40mg_4	sc	1	2	45	102	31 02	2	0.657	33.2			272.05	2.393		34	1
31	1	placebo	0.271845	1	0			0	4	28	103	31 04	4	0.709	32.6			274.71	2.712		33	0
31	2	adalimumab	0.676471	7	160	160mg_0 80mg_2 40mg_4	sc	1	4	69	102	31 04	4	0.657	33.2			272.05	2.393		34	1
33	1	placebo	0.189655	1	0			0	1	11	58	33 01	1	0.517	34.5	9.08	32.8	288	2.5	122	35	0
33	2	vedolizumab	0.225806	8	35	0.5mg/kg_q4w	iv	2	1	14	62	33 01	1	0.403	36	8.75	46.8	288	1.96	131	36	2
33	3	vedolizumab	0.292308	8	140	2.0mg/kg_q4w	iv	2	1	19	65	33 01	1	0.477	38.5	8	41.5	297	2.46	131	37	2
33	1	placebo	0.224138	1	0			0	2	13	58	33 02	2	0.517	34.5	9.08	32.8	288	2.5	122	35	0
33	2	vedolizumab	0.354839	8	35	0.5mg/kg_0,4w	iv	2	2	22	62	33 02	2	0.403	36	8.75	46.8	288	1.96	131	36	2
33	3	vedolizumab	0.415385	8	140	2.0mg/kg_0,4w	iv	2	2	27	65	33 02	2	0.477	38.5	8	41.5	297	2.46	131	37	2
33	1	placebo	0.37931	1	0			0	4	22	58	33 04	4	0.517	34.5	9.08	32.8	288	2.5	122	35	0
33	2	vedolizumab	0.419355	8	35	0.5mg/kg_0,4w	iv	2	4	26	62	33 04	4	0.403	36	8.75	46.8	288	1.96	131	36	2
33	3	vedolizumab	0.461538	8	140	2.0mg/kg_0,4w	iv	2	4	30	65	33 04	4	0.477	38.5	8	41.5	297	2.46	131	37	2
33	1	placebo	0.465517	1	0			0	6	27	58	33 06	5	0.517	34.5	9.08	32.8	288	2.5	122	35	0
33	2	vedolizumab	0.467742	8	35	0.5mg/kg_0,4w	iv	2	6	29	62	33 06	5	0.403	36	8.75	46.8	288	1.96	131	36	2
33	3	vedolizumab	0.507692	8	140	2.0mg/kg_0,4w	iv	2	6	33	65	33 06	5	0.477	38.5	8	41.5	297	2.46	131	37	2
33	1	placebo	0.413793	1	0			0	8	24	58	33 08	6	0.517	34.5	9.08	32.8	288	2.5	122	35	0
33	2	vedolizumab	0.483871	8	35	0.5mg/kg_0,4w	iv	2	8	30	62	33 08	6	0.403	36	8.75	46.8	288	1.96	131	36	2
33	3	vedolizumab	0.523077	8	140	2.0mg/kg_0,4w	iv	2	8	34	65	33 08	6	0.477	38.5	8	41.5	297	2.46	131	37	2
37	1	placebo	0.423077	1	0			0	2	11	26	37 02	2	0.576923	37	13	27	292	1.2		38	0
37	2	ustekinumab	0.44	9	90	90mg_qw_0-3w	sc	1	2	11	25	37 02	2	0.6	37	12	40	311	1.7		39	3
37	1	placebo	0.307692	1	0			0	4	8	26	37 04	4	0.576923	37	13	27	292	1.2		38	0
37	2	ustekinumab	0.52	9	90	90mg_qw_0-3w	sc	1	4	13	25	37 04	4	0.6	37	12	40	311	1.7		39	3
37	1	placebo	0.384615	1	0			0	6	10	26	37 06	5	0.576923	37	13	27	292	1.2		38	0
37	2	ustekinumab	0.52	9	90	90mg_qw_0-3w	sc	1	6	13	25	37 06	5	0.6	37	12	40	311	1.7		39	3
37	1	placebo	0.5	1	0			0	8	13	26	37 08	6	0.576923	37	13	27	292	1.2		38	0
37	2	ustekinumab	0.48	9	90	90mg_qw_0-3w	sc	1	8	12	25	37 08	6	0.6	37	12	40	311	1.7		39	3
41	1	placebo	0.4	1	0			0	4	22	55	41 04	4	0.44	35	11		324	1.8	115	50	0
41	3	semapimod	0.411765	10	180	60mg_3d	iv	2	4	21	51	41 04	4	0.53	37	10.3		311	3.6	122	52	1
41	1	placebo	0.4	1	0			0	8	22	55	41 08	6	0.44	35	11		324	1.8	115	50	0
41	3	semapimod	0.411765	10	180	60mg_3d	iv	2	8	21	51	41 08	6	0.53	37	10.3		311	3.6	122	52	1
44	1	placebo	0.352941	1	0			0	1	12	34	44 01	1	0.352941	35.7	8.2	29.4	306.4	1.71		53	0
44	2	tofacitinib	0.25	11	1	1mg_bid_4w	po	3	1	9	36	44 01	1	0.694444	38.6	11.1	22.2	300.3	1.83		54	5
44	3	tofacitinib	0.34375	11	5	5mg_bid_4w	po	3	1	11	32	44 01	1	0.411765	38.7	10.9	32.4	297.7	1.75		55	5
44	4	tofacitinib	0.257143	11	15	15mg_bid_4w	po	3	1	9	35	44 01	1	0.514286	38.1	11.2	22.9	308	2.61		56	5
44	1	placebo	0.322581	1	0			0	2	10	31	44 02	2	0.352941	35.7	8.2	29.4	306.4	1.71		53	0
44	2	tofacitinib	0.416667	11	1	1mg_bid_4w	po	3	2	15	36	44 02	2	0.694444	38.6	11.1	22.2	300.3	1.83		54	5
44	3	tofacitinib	0.419355	11	5	5mg_bid_4w	po	3	2	13	31	44 02	2	0.411765	38.7	10.9	32.4	297.7	1.75		55	5
44	4	tofacitinib	0.457143	11	15	15mg_bid_4w	po	3	2	16	35	44 02	2	0.514286	38.1	11.2	22.9	308	2.61		56	5
44	1	placebo	0.5	1	0			0	4	16	32	44 04	4	0.352941	35.7	8.2	29.4	306.4	1.71		53	0
44	2	tofacitinib	0.371429	11	1	1mg_bid_4w	po	3	4	13	35	44 04	4	0.694444	38.6	11.1	22.2	300.3	1.83		54	5
44	3	tofacitinib	0.633333	11	5	5mg_bid_4w	po	3	4	19	30	44 04	4	0.411765	38.7	10.9	32.4	297.7	1.75		55	5
44	4	tofacitinib	0.484848	11	15	15mg_bid_4w	po	3	4	16	33	44 04	4	0.514286	38.1	11.2	22.9	308	2.61		56	5
45	1	placebo	0.377778	1	0			0	2	34	90	45 02	2	0.340659	37.2	10.8		313	0.55		57	0
45	2	tofacitinib	0.470588	11	5	5mg_bid_8w	po	3	2	40	85	45 02	2	0.627907	40.2	11.2		314	0.59		58	5
45	3	tofacitinib	0.44186	11	10	10mg_bid_8w	po	3	2	38	86	45 02	2	0.453488	39.3	11.3		320	0.55		59	5
45	1	placebo	0.5	1	0			0	4	45	90	45 04	4	0.340659	37.2	10.8		313	0.55		57	0
45	2	tofacitinib	0.576471	11	5	5mg_bid_8w	po	3	4	49	85	45 04	4	0.627907	40.2	11.2		314	0.59		58	5
45	3	tofacitinib	0.569767	11	10	10mg_bid_8w	po	3	4	49	86	45 04	4	0.453488	39.3	11.3		320	0.55		59	5
45	1	placebo	0.622222	1	0			0	8	56	90	45 08	6	0.340659	37.2	10.8		313	0.55		57	0
45	2	tofacitinib	0.764706	11	5	5mg_bid_8w	po	3	8	65	85	45 08	6	0.627907	40.2	11.2		314	0.59		58	5
45	3	tofacitinib	0.744186	11	10	10mg_bid_8w	po	3	8	64	86	45 08	6	0.453488	39.3	11.3		320	0.55		59	5
51	1	placebo	0.130435	1	0			0	2	9	69	51 02	2	0.449275	38.4	10		320.7	2.04		66	0
51	2	PF-04236921	0.2	13	10	10mg_0,4w	sc	1	2	13	65	51 02	2	0.492537	38.9	11		319.9	1.64		67	3
51	3	PF-04236921	0.183099	13	50	50mg_0,4w	sc	1	2	13	71	51 02	2	0.380282	38.9	9.8		296.7	2.11		68	3
51	4	PF-04236921	0.275	13	200	200mg_0,4w	sc	1	2	11	40	51 02	2	0.375	42.2	11.5		337.4	3.22		69	3
51	1	placebo	0.15942	1	0			0	4	11	69	51 04	4	0.449275	38.4	10		320.7	2.04		66	0
51	2	PF-04236921	0.353846	13	10	10mg_0,4w	sc	1	4	23	65	51 04	4	0.492537	38.9	11		319.9	1.64		67	3
51	3	PF-04236921	0.366197	13	50	50mg_0,4w	sc	1	4	26	71	51 04	4	0.380282	38.9	9.8		296.7	2.11		68	3
51	4	PF-04236921	0.25	13	200	200mg_0,4w	sc	1	4	10	40	51 04	4	0.375	42.2	11.5		337.4	3.22		69	3
51	1	placebo	0.217391	1	0			0	6	15	69	51 06	5	0.449275	38.4	10		320.7	2.04		66	0
51	2	PF-04236921	0.353846	13	10	10mg_0,4w	sc	1	6	23	65	51 06	5	0.492537	38.9	11		319.9	1.64		67	3
51	3	PF-04236921	0.464789	13	50	50mg_0,4w	sc	1	6	33	71	51 06	5	0.380282	38.9	9.8		296.7	2.11		68	3
51	4	PF-04236921	0.275	13	200	200mg_0,4w	sc	1	6	11	40	51 06	5	0.375	42.2	11.5		337.4	3.22		69	3
51	1	placebo	0.304348	1	0			0	8	21	69	51 08	6	0.449275	38.4	10		320.7	2.04		66	0
51	2	PF-04236921	0.353846	13	10	10mg_0,4w	sc	1	8	23	65	51 08	6	0.492537	38.9	11		319.9	1.64		67	3
51	3	PF-04236921	0.492958	13	50	50mg_0,4w	sc	1	8	35	71	51 08	6	0.380282	38.9	9.8		296.7	2.11		68	3
51	4	PF-04236921	0.4	13	200	200mg_0,4w	sc	1	8	16	40	51 08	6	0.375	42.2	11.5		337.4	3.22		69	3
51	1	placebo	0.289855	1	0			0	10	20	69	51 1	7	0.449275	38.4	10		320.7	2.04		66	0
51	2	PF-04236921	0.384615	13	10	10mg_0,4w	sc	1	10	25	65	51 1	7	0.492537	38.9	11		319.9	1.64		67	3
51	3	PF-04236921	0.549296	13	50	50mg_0,4w	sc	1	10	39	71	51 1	7	0.380282	38.9	9.8		296.7	2.11		68	3
51	4	PF-04236921	0.475	13	200	200mg_0,4w	sc	1	10	19	40	51 1	7	0.375	42.2	11.5		337.4	3.22		69	3
51	1	placebo	0.289855	1	0			0	12	20	69	51 12	8	0.449275	38.4	10		320.7	2.04		66	0
51	2	PF-04236921	0.353846	13	10	10mg_0,4w	sc	1	12	23	65	51 12	8	0.492537	38.9	11		319.9	1.64		67	3
51	3	PF-04236921	0.478873	13	50	50mg_0,4w	sc	1	12	34	71	51 12	8	0.380282	38.9	9.8		296.7	2.11		68	3
51	4	PF-04236921	0.425	13	200	200mg_0,4w	sc	1	12	17	40	51 12	8	0.375	42.2	11.5		337.4	3.22		69	3
52	1	placebo	0.35	1	0			0	2	21	60	52 02	2	0.52381	34.4	11.5	30.2	313.1	1.89		70	0
52	2	PF-00547659	0.34375	18	22.5	22.5mg_q4w_0-8w	sc	1	2	22	64	52 02	2	0.272727	37.3	12.7	33.3	307.4	2.11		71	8
52	3	PF-00547659	0.216667	18	75	75mg_q4w_0-8w	sc	1	2	13	60	52 02	2	0.461538	34.4	11.4	32.3	324.1	1.46		72	8
52	4	PF-00547659	0.333333	18	225	225mg_q4w_0-8w	sc	1	2	21	63	52 02	2	0.367647	35.9	12	30.9	316.4	1.72		73	8
52	1	placebo	0.258621	1	0			0	4	15	58	52 04	4	0.52381	34.4	11.5	30.2	313.1	1.89		70	0
52	2	PF-00547659	0.37931	18	22.5	22.5mg_q4w_0-8w	sc	1	4	22	58	52 04	4	0.272727	37.3	12.7	33.3	307.4	2.11		71	8
52	3	PF-00547659	0.4	18	75	75mg_q4w_0-8w	sc	1	4	24	60	52 04	4	0.461538	34.4	11.4	32.3	324.1	1.46		72	8
52	4	PF-00547659	0.338462	18	225	225mg_q4w_0-8w	sc	1	4	22	65	52 04	4	0.367647	35.9	12	30.9	316.4	1.72		73	8
52	1	placebo	0.482759	1	0			0	6	28	58	52 06	5	0.52381	34.4	11.5	30.2	313.1	1.89		70	0
52	2	PF-00547659	0.446429	18	22.5	22.5mg_q4w_0-8w	sc	1	6	25	56	52 06	5	0.272727	37.3	12.7	33.3	307.4	2.11		71	8
52	3	PF-00547659	0.537037	18	75	75mg_q4w_0-8w	sc	1	6	29	54	52 06	5	0.461538	34.4	11.4	32.3	324.1	1.46		72	8
52	4	PF-00547659	0.46875	18	225	225mg_q4w_0-8w	sc	1	6	30	64	52 06	5	0.367647	35.9	12	30.9	316.4	1.72		73	8
52	1	placebo	0.482143	1	0			0	8	27	56	52 08	6	0.52381	34.4	11.5	30.2	313.1	1.89		70	0
52	2	PF-00547659	0.52	18	22.5	22.5mg_q4w_0-8w	sc	1	8	26	50	52 08	6	0.272727	37.3	12.7	33.3	307.4	2.11		71	8
52	3	PF-00547659	0.6	18	75	75mg_q4w_0-8w	sc	1	8	33	55	52 08	6	0.461538	34.4	11.4	32.3	324.1	1.46		72	8
52	4	PF-00547659	0.629032	18	225	225mg_q4w_0-8w	sc	1	8	39	62	52 08	6	0.367647	35.9	12	30.9	316.4	1.72		73	8
52	1	placebo	0.538462	1	0			0	10	28	52	52 1	7	0.52381	34.4	11.5	30.2	313.1	1.89		70	0
52	2	PF-00547659	0.68	18	22.5	22.5mg_q4w_0-8w	sc	1	10	34	50	52 1	7	0.272727	37.3	12.7	33.3	307.4	2.11		71	8
52	3	PF-00547659	0.583333	18	75	75mg_q4w_0-8w	sc	1	10	28	48	52 1	7	0.461538	34.4	11.4	32.3	324.1	1.46		72	8
52	4	PF-00547659	0.616667	18	225	225mg_q4w_0-8w	sc	1	10	37	60	52 1	7	0.367647	35.9	12	30.9	316.4	1.72		73	8
52	1	placebo	0.592593	1	0			0	12	32	54	52 12	8	0.52381	34.4	11.5	30.2	313.1	1.89		70	0
52	2	PF-00547659	0.627451	18	22.5	22.5mg_q4w_0-8w	sc	1	12	32	51	52 12	8	0.272727	37.3	12.7	33.3	307.4	2.11		71	8
52	3	PF-00547659	0.653061	18	75	75mg_q4w_0-8w	sc	1	12	32	49	52 12	8	0.461538	34.4	11.4	32.3	324.1	1.46		72	8
52	4	PF-00547659	0.57377	18	225	225mg_q4w_0-8w	sc	1	12	35	61	52 12	8	0.367647	35.9	12	30.9	316.4	1.72		73	8
53	1	placebo	0.466667	1	0			0	8	28	60	53 08	6	0.383333	38.1	11.2		312.4	2.11		74	0
53	2	brazikumab	0.525424	14	700	700mg_0,4	iv	2	8	31	59	53 08	6	0.372881	34.9	13.1		325	2.98		75	3
54	1	placebo	0.378378	1	0			0	2	14	37	54 02	2	0.351351	40.5	8.7		276	0.7		76	0
54	2	upadacitinib	0.307692	15	3	3mg_bid_16w	po	3	2	12	39	54 02	2	0.512821	39.7	10.7		288	0.6		77	5
54	3	upadacitinib	0.540541	15	6	6mg_bid_16w	po	3	2	20	37	54 02	2	0.432432	40.5	8.8		296	1.17		78	5
54	4	upadacitinib	0.444444	15	12	12mg_bid_16w	po	3	2	16	36	54 02	2	0.527778	40.8	9.1		280	1.66		79	5
54	5	upadacitinib	0.571429	15	12	24mg_qd_16w	po	3	2	20	35	54 02	2	0.457143	40.2	10.8		305	0.74		80	5
54	6	upadacitinib	0.416667	15	24	24mg_bid_16w	po	3	2	15	36	54 02	2	0.305556	42.5	14.1		277.5	0.59		81	5
54	1	placebo	0.297297	1	0			0	4	11	37	54 04	4	0.351351	40.5	8.7		276	0.7		76	0
54	2	upadacitinib	0.358974	15	3	3mg_bid_16w	po	3	4	14	39	54 04	4	0.512821	39.7	10.7		288	0.6		77	5
54	3	upadacitinib	0.540541	15	6	6mg_bid_16w	po	3	4	20	37	54 04	4	0.432432	40.5	8.8		296	1.17		78	5
54	4	upadacitinib	0.5	15	12	12mg_bid_16w	po	3	4	18	36	54 04	4	0.527778	40.8	9.1		280	1.66		79	5
54	5	upadacitinib	0.457143	15	12	24mg_qd_16w	po	3	4	16	35	54 04	4	0.457143	40.2	10.8		305	0.74		80	5
54	6	upadacitinib	0.555556	15	24	24mg_bid_16w	po	3	4	20	36	54 04	4	0.305556	42.5	14.1		277.5	0.59		81	5
54	1	placebo	0.297297	1	0			0	8	11	37	54 08	6	0.351351	40.5	8.7		276	0.7		76	0
54	2	upadacitinib	0.384615	15	3	3mg_bid_16w	po	3	8	15	39	54 08	6	0.512821	39.7	10.7		288	0.6		77	5
54	3	upadacitinib	0.567568	15	6	6mg_bid_16w	po	3	8	21	37	54 08	6	0.432432	40.5	8.8		296	1.17		78	5
54	4	upadacitinib	0.555556	15	12	12mg_bid_16w	po	3	8	20	36	54 08	6	0.527778	40.8	9.1		280	1.66		79	5
54	5	upadacitinib	0.542857	15	12	24mg_qd_16w	po	3	8	19	35	54 08	6	0.457143	40.2	10.8		305	0.74		80	5
54	6	upadacitinib	0.5	15	24	24mg_bid_16w	po	3	8	18	36	54 08	6	0.305556	42.5	14.1		277.5	0.59		81	5
54	1	placebo	0.351351	1	0			0	12	13	37	54 12	8	0.351351	40.5	8.7		276	0.7		76	0
54	2	upadacitinib	0.384615	15	3	3mg_bid_16w	po	3	12	15	39	54 12	8	0.512821	39.7	10.7		288	0.6		77	5
54	3	upadacitinib	0.594595	15	6	6mg_bid_16w	po	3	12	22	37	54 12	8	0.432432	40.5	8.8		296	1.17		78	5
54	4	upadacitinib	0.472222	15	12	12mg_bid_16w	po	3	12	17	36	54 12	8	0.527778	40.8	9.1		280	1.66		79	5
54	5	upadacitinib	0.514286	15	12	24mg_qd_16w	po	3	12	18	35	54 12	8	0.457143	40.2	10.8		305	0.74		80	5
54	6	upadacitinib	0.583333	15	24	24mg_bid_16w	po	3	12	21	36	54 12	8	0.305556	42.5	14.1		277.5	0.59		81	5
54	1	placebo	0.351351	1	0			0	16	13	37	54 16	10	0.351351	40.5	8.7		276	0.7		76	0
54	2	upadacitinib	0.461538	15	3	3mg_bid_16w	po	3	16	18	39	54 16	10	0.512821	39.7	10.7		288	0.6		77	5
54	3	upadacitinib	0.540541	15	6	6mg_bid_16w	po	3	16	20	37	54 16	10	0.432432	40.5	8.8		296	1.17		78	5
54	4	upadacitinib	0.444444	15	12	12mg_bid_16w	po	3	16	16	36	54 16	10	0.527778	40.8	9.1		280	1.66		79	5
54	5	upadacitinib	0.485714	15	12	24mg_qd_16w	po	3	16	17	35	54 16	10	0.457143	40.2	10.8		305	0.74		80	5
54	6	upadacitinib	0.611111	15	24	24mg_bid_16w	po	3	16	22	36	54 16	10	0.305556	42.5	14.1		277.5	0.59		81	5
58	1	placebo	0.486111	1	0			0	4	70	144	58 04	4	0.42	36.6	6	0.33	329.9	3.08		82	0
58	2	vercirnon	0.561224	16	250	250mg_qd_12w	po	3	4	55	98	58 04	4	0.47	37.2	6	0.25	340.1	2.8		83	10
58	3	vercirnon	0.53125	16	500	250mg_bid_12w	po	3	4	51	96	58 04	4	0.45	37.3	5	0.37	323.3	2.76		84	10
58	4	vercirnon	0.556701	16	500	500mg_qd_12w	po	3	4	54	97	58 04	4	0.51	34.9	6	0.3	332.5	3.03		85	10
58	1	placebo	0.493056	1	0			0	8	71	144	58 08	6	0.42	36.6	6	0.33	329.9	3.08		82	0
58	2	vercirnon	0.520408	16	250	250mg_qd_12w	po	3	8	51	98	58 08	6	0.47	37.2	6	0.25	340.1	2.8		83	10
58	3	vercirnon	0.479167	16	500	250mg_bid_12w	po	3	8	46	96	58 08	6	0.45	37.3	5	0.37	323.3	2.76		84	10
58	4	vercirnon	0.597938	16	500	500mg_qd_12w	po	3	8	58	97	58 08	6	0.51	34.9	6	0.3	332.5	3.03		85	10
58	1	placebo	0.472222	1	0			0	12	68	144	58 12	8	0.42	36.6	6	0.33	329.9	3.08		82	0
58	2	vercirnon	0.561224	16	250	250mg_qd_12w	po	3	12	55	98	58 12	8	0.47	37.2	6	0.25	340.1	2.8		83	10
58	3	vercirnon	0.489583	16	500	250mg_bid_12w	po	3	12	47	96	58 12	8	0.45	37.3	5	0.37	323.3	2.76		84	10
58	4	vercirnon	0.608247	16	500	500mg_qd_12w	po	3	12	59	97	58 12	8	0.51	34.9	6	0.3	332.5	3.03		85	10
62	1	placebo	0.142857	1	0			0	1	9	63	62 01	1	0.571	35.1			311.2	2.13		86	0
62	2	laquinimod	0.241379	17	0.5	0.5mg_qd	po	3	1	7	29	62 01	1	0.448	39.6			288.3	1.71		87	7
62	3	laquinimod	0.266667	17	1	1.0mg_qd	po	3	1	8	30	62 01	1	0.433	38.2			291.9	0.67		88	7
62	4	laquinimod	0.137931	17	1.5	1.5mg_qd	po	3	1	4	29	62 01	1	0.276	40.9			297.8	1.51		89	7
62	5	laquinimod	0.241379	17	2	2.0mg_qd_8w	po	3	1	7	29	62 01	1	0.414	37.4			313.2	0.65		90	7
62	1	placebo	0.349206	1	0			0	2	22	63	62 02	2	0.571	35.1			311.2	2.13		86	0
62	2	laquinimod	0.413793	17	0.5	0.5mg_qd_8w	po	3	2	12	29	62 02	2	0.448	39.6			288.3	1.71		87	7
62	3	laquinimod	0.333333	17	1	1.0mg_qd_8w	po	3	2	10	30	62 02	2	0.433	38.2			291.9	0.67		88	7
62	4	laquinimod	0.344828	17	1.5	1.5mg_qd_8w	po	3	2	10	29	62 02	2	0.276	40.9			297.8	1.51		89	7
62	5	laquinimod	0.344828	17	2	2.0mg_qd_8w	po	3	2	10	29	62 02	2	0.414	37.4			313.2	0.65		90	7
62	1	placebo	0.396825	1	0			0	4	25	63	62 04	4	0.571	35.1			311.2	2.13		86	0
62	2	laquinimod	0.586207	17	0.5	0.5mg_qd_8w	po	3	4	17	29	62 04	4	0.448	39.6			288.3	1.71		87	7
62	3	laquinimod	0.433333	17	1	1.0mg_qd_8w	po	3	4	13	30	62 04	4	0.433	38.2			291.9	0.67		88	7
62	4	laquinimod	0.344828	17	1.5	1.5mg_qd_8w	po	3	4	10	29	62 04	4	0.276	40.9			297.8	1.51		89	7
62	5	laquinimod	0.275862	17	2	2.0mg_qd_8w	po	3	4	8	29	62 04	4	0.414	37.4			313.2	0.65		90	7
62	1	placebo	0.349206	1	0			0	6	22	63	62 06	5	0.571	35.1			311.2	2.13		86	0
62	2	laquinimod	0.689655	17	0.5	0.5mg_qd_8w	po	3	6	20	29	62 06	5	0.448	39.6			288.3	1.71		87	7
62	3	laquinimod	0.5	17	1	1.0mg_qd_8w	po	3	6	15	30	62 06	5	0.433	38.2			291.9	0.67		88	7
62	4	laquinimod	0.37931	17	1.5	1.5mg_qd_8w	po	3	6	11	29	62 06	5	0.276	40.9			297.8	1.51		89	7
62	5	laquinimod	0.275862	17	2	2.0mg_qd_8w	po	3	6	8	29	62 06	5	0.414	37.4			313.2	0.65		90	7
62	1	placebo	0.349206	1	0			0	8	22	63	62 08	6	0.571	35.1			311.2	2.13		86	0
62	2	laquinimod	0.62069	17	0.5	0.5mg_qd_8w	po	3	8	18	29	62 08	6	0.448	39.6			288.3	1.71		87	7
62	3	laquinimod	0.533333	17	1	1.0mg_qd_8w	po	3	8	16	30	62 08	6	0.433	38.2			291.9	0.67		88	7
62	4	laquinimod	0.310345	17	1.5	1.5mg_qd_8w	po	3	8	9	29	62 08	6	0.276	40.9			297.8	1.51		89	7
62	5	laquinimod	0.275862	17	2	2.0mg_qd_8w	po	3	8	8	29	62 08	6	0.414	37.4			313.2	0.65		90	7
62	1	placebo	0.365079	1	0			0	12	23	63	62 12	8	0.571	35.1			311.2	2.13		86	0
62	2	laquinimod	0.586207	17	0.5	0.5mg_qd_8w	po	3	12	17	29	62 12	8	0.448	39.6			288.3	1.71		87	7
62	3	laquinimod	0.533333	17	1	1.0mg_qd_8w	po	3	12	16	30	62 12	8	0.433	38.2			291.9	0.67		88	7
62	4	laquinimod	0.310345	17	1.5	1.5mg_qd_8w	po	3	12	9	29	62 12	8	0.276	40.9			297.8	1.51		89	7
62	5	laquinimod	0.275862	17	2	2.0mg_qd_8w	po	3	12	8	29	62 12	8	0.414	37.4			313.2	0.65		90	7

## Sheet: CDAI
trialNO	armNO	treatment	FLAG	DOSE	Regimen	method	methodFlag	no	week	cdai	SD	group week	tp1	male	age	dur	smok	CDAI	CRP	IBDQ	group	CLASS
11	1	placebo	1	0			0	249	4	-50.1	84.71	11 04	4	0.41	37.7	10.025	0.19	299.5	2.34	122.5	11	0
11	2	natalizumab	3	300	300mg_0,4,8	iv	2	258	4	-83	87.03	11 04	4	0.41	38.1	10.17	0.22	303.9	2.3	123.6	12	2
11	1	placebo	1	0			0	249	8	-65.8	96.88	11 08	6	0.41	37.7	10.025	0.19	299.5	2.34	122.5	11	0
11	2	natalizumab	3	300	300mg_0,4,8	iv	2	258	8	-104.4	94.47	11 08	6	0.41	38.1	10.17	0.22	303.9	2.3	123.6	12	2
11	1	placebo	1	0			0	249	12	-68.3	99.34	11 12	8	0.41	37.7	10.025	0.19	299.5	2.34	122.5	11	0
11	2	natalizumab	3	300	300mg_0,4,8	iv	2	258	12	-117.9	104.55	11 12	8	0.41	38.1	10.17	0.22	303.9	2.3	123.6	12	2
16	1	placebo	1	0			0	132	2	-35		16 02	2	0.326	37.7	8.4		300	0.75	124	15	0
16	2	CDP571	4	700	10mg/kg_q8w_0-24w	iv	2	263	2	-62		16 02	2	0.399	37.9	9.1		293	0.67	129	16	1
16	1	placebo	1	0			0	132	4	-44		16 04	4	0.326	37.7	8.4		300	0.75	124	15	0
16	2	CDP571	4	700	10mg/kg_q8w_0-24w	iv	2	263	4	-67		16 04	4	0.399	37.9	9.1		293	0.67	129	16	1
16	1	placebo	1	0			0	132	8	-51		16 08	6	0.326	37.7	8.4		300	0.75	124	15	0
16	2	CDP571	4	700	10mg/kg_q8w_0-24w	iv	2	263	8	-56		16 08	6	0.399	37.9	9.1		293	0.67	129	16	1
16	1	placebo	1	0			0	132	12	-51		16 12	8	0.326	37.7	8.4		300	0.75	124	15	0
16	2	CDP571	4	700	10mg/kg_q8w_0-24w	iv	2	263	12	-65		16 12	8	0.399	37.9	9.1		293	0.67	129	16	1
16	1	placebo	1	0			0	132	16	-46		16 16	9	0.326	37.7	8.4		300	0.75	124	15	0
16	2	CDP571	4	700	10mg/kg_q8w_0-24w	iv	2	263	16	-58		16 16	9	0.399	37.9	9.1		293	0.67	129	16	1
16	1	placebo	1	0			0	132	24	-49		16 24	11	0.326	37.7	8.4		300	0.75	124	15	0
16	2	CDP571	4	700	10mg/kg_q8w_0-24w	iv	2	263	24	-62		16 24	11	0.399	37.9	9.1		293	0.67	129	16	1
16	1	placebo	1	0			0	132	28	-51		16 28	13	0.326	37.7	8.4		300	0.75	124	15	0
16	2	CDP571	4	700	10mg/kg_q8w_0-24w	iv	2	263	28	-68		16 28	13	0.399	37.9	9.1		293	0.67	129	16	1
17	1	placebo	1	0			0	20	2	20.8		17 02	2	0.5	39.3			266.1		121.4	17	0
17	2	etanercept	5	25	25mg_biw_0-8w	sc	1	23	2	-22.3		17 02	2	0.695652	37.4			299.5		124.4	18	1
17	1	placebo	1	0			0	20	4	-48		17 04	4	0.5	39.3			266.1		121.4	17	0
17	2	etanercept	5	25	25mg_biw_0-8w	sc	1	23	4	-27.4		17 04	4	0.695652	37.4			299.5		124.4	18	1
17	1	placebo	1	0			0	20	8	-15.4		17 08	6	0.5	39.3			266.1		121.4	17	0
17	2	etanercept	5	25	25mg_biw_0-8w	sc	1	23	8	-23.2		17 08	6	0.695652	37.4			299.5		124.4	18	1
22	1	placebo	1	0			0	198	2	-42	82	22 02	2	0.418605	38.8	7		293	0.902	122.1	23	0
22	2	certolizumab	6	400	400mg_q2w_0-4w	sc	1	204	2	-74	81	22 02	2	0.470852	36.3	7.5		293	0.941	126.5	24	1
22	1	placebo	1	0			0	184	4	-66	83	22 04	4	0.418605	38.8	7		293	0.902	122.1	23	0
22	2	certolizumab	6	400	400mg_q2w_0-4w	sc	1	198	4	-89	91	22 04	4	0.470852	36.3	7.5		293	0.941	126.5	24	1
22	1	placebo	1	0			0	183	6	-73	95	22 06	5	0.418605	38.8	7		293	0.902	122.1	23	0
22	2	certolizumab	6	400	400mg_q2w_0-4w	sc	1	192	6	-97	101	22 06	5	0.470852	36.3	7.5		293	0.941	126.5	24	1
23	1	placebo	1	0			0	215	2	-21		23 02	2	0.39939	28	8	0.33	284.3	0.902		25	0
23	2	certolizumab	6	400	400mg_0,2,4w_q4w_8-26w	sc	1	223	2	-37.4		23 02	2	0.47432	37	7	0.31	284.7	0.82		26	1
23	1	placebo	1	0			0	215	4	-36.6		23 04	4	0.39939	28	8	0.33	284.3	0.902		25	0
23	2	certolizumab	6	400	400mg_0,2,4w_q4w_8-26w	sc	1	223	4	-52.4		23 04	4	0.47432	37	7	0.31	284.7	0.82		26	1
23	1	placebo	1	0			0	215	6	-38.5		23 06	5	0.39939	28	8	0.33	284.3	0.902		25	0
23	2	certolizumab	6	400	400mg_0,2,4w_q4w_8-26w	sc	1	223	6	-55.6		23 06	5	0.47432	37	7	0.31	284.7	0.82		26	1
23	1	placebo	1	0			0	215	8	-39.6		23 08	6	0.39939	28	8	0.33	284.3	0.902		25	0
23	2	certolizumab	6	400	400mg_0,2,4w_q4w_8-26w	sc	1	223	8	-53.9		23 08	6	0.47432	37	7	0.31	284.7	0.82		26	1
23	1	placebo	1	0			0	215	12	-40.2		23 12	8	0.39939	28	8	0.33	284.3	0.902		25	0
23	2	certolizumab	6	400	400mg_0,2,4w_q4w_8-26w	sc	1	223	12	-59.9		23 12	8	0.47432	37	7	0.31	284.7	0.82		26	1
23	1	placebo	1	0			0	215	16	-33.1		23 16	9	0.39939	28	8	0.33	284.3	0.902		25	0
23	2	certolizumab	6	400	400mg_0,2,4w_q4w_8-26w	sc	1	223	16	-57.8		23 16	9	0.47432	37	7	0.31	284.7	0.82		26	1
23	1	placebo	1	0			0	215	20	-19.5		23 2	10	0.39939	28	8	0.33	284.3	0.902		25	0
23	2	certolizumab	6	400	400mg_0,2,4w_q4w_8-26w	sc	1	223	20	-57.8		23 2	10	0.47432	37	7	0.31	284.7	0.82		26	1
23	1	placebo	1	0			0	215	24	-22.5		23 24	11	0.39939	28	8	0.33	284.3	0.902		25	0
23	2	certolizumab	6	400	400mg_0,2,4w_q4w_8-26w	sc	1	223	24	-56.9		23 24	11	0.47432	37	7	0.31	284.7	0.82		26	1
23	1	placebo	1	0			0	215	26	-11.2		23 26	12	0.39939	28	8	0.33	284.3	0.902		25	0
23	2	certolizumab	6	400	400mg_0,2,4w_q4w_8-26w	sc	1	223	26	-66.2		23 26	12	0.47432	37	7	0.31	284.7	0.82		26	1
26	1	placebo	1	0			0	74	1	-39.3		26 01	1	0.5	37		0.38	295.7	1.8	126.9	27	0
26	2	adalimumab	7	40	40mg_0w_20mg_2w	sc	1	74	1	-49.8		26 01	1	0.527027	39		0.34	298	1.6	129.9	28	1
26	3	adalimumab	7	80	80mg_0w_40mg_2w	sc	1	75	1	-61.4		26 01	1	0.333333	38		0.43	300.7	2	126.9	29	1
26	4	adalimumab	7	160	160mg_0w_80mg_2w	sc	1	76	1	-56.2		26 01	1	0.473684	39		0.42	295.4	1.4	125.1	30	1
26	1	placebo	1	0			0	74	2	-51.2		26 02	2	0.5	37		0.38	295.7	1.8	126.9	27	0
26	2	adalimumab	7	40	40mg_0w_20mg_2w	sc	1	74	2	-58.2		26 02	2	0.527027	39		0.34	298	1.6	129.9	28	1
26	3	adalimumab	7	80	80mg_0w_40mg_2w	sc	1	75	2	-81.5		26 02	2	0.333333	38		0.43	300.7	2	126.9	29	1
26	4	adalimumab	7	160	160mg_0w_80mg_2w	sc	1	76	2	-79		26 02	2	0.473684	39		0.42	295.4	1.4	125.1	30	1
26	1	placebo	1	0			0	74	4	-55.4		26 04	4	0.5	37		0.38	295.7	1.8	126.9	27	0
26	2	adalimumab	7	40	40mg_0w_20mg_2w	sc	1	74	4	-67.4		26 04	4	0.527027	39		0.34	298	1.6	129.9	28	1
26	3	adalimumab	7	80	80mg_0w_40mg_2w	sc	1	75	4	-89.9		26 04	4	0.333333	38		0.43	300.7	2	126.9	29	1
26	4	adalimumab	7	160	160mg_0w_80mg_2w	sc	1	76	4	-100.7		26 04	4	0.473684	39		0.42	295.4	1.4	125.1	30	1
28	1	placebo	1	0			0	23	2	-27.2		28 02	2	0.695652	30.4	7.9	0.261	308.1	2.5	139.4	31	0
28	2	adalimumab	7	80	80mg_0w_40mg_2w	sc	1	34	2	-74.4		28 02	2	0.470588	30.6	9.2	0.441	302.7	3	148.6	32	1
28	3	adalimumab	7	160	160mg_0w_80mg_2w	sc	1	33	2	-75.9		28 02	2	0.606061	32	11	0.333	300.5	2.2	145.9	33	1
28	1	placebo	1	0			0	23	4	-37.5		28 04	4	0.695652	30.4	7.9	0.261	308.1	2.5	139.4	31	0
28	2	adalimumab	7	80	80mg_0w_40mg_2w	sc	1	34	4	-81.3		28 04	4	0.470588	30.6	9.2	0.441	302.7	3	148.6	32	1
28	3	adalimumab	7	160	160mg_0w_80mg_2w	sc	1	33	4	-101.3		28 04	4	0.606061	32	11	0.333	300.5	2.2	145.9	33	1
29	1	placebo	1	0			0	166	1	-26		29 01	1	0.391566	37		0.34	313	2	124	34	0
29	2	adalimumab	7	160	160mg_0w_80mg_2w	sc	1	159	1	-49		29 01	1	0.314465	39		0.35	313	1.9	120	35	1
29	1	placebo	1	0			0	166	2	-32		29 02	2	0.391566	37		0.34	313	2	124	34	0
29	2	adalimumab	7	160	160mg_0w_80mg_2w	sc	1	159	2	-81		29 02	2	0.314465	39		0.35	313	1.9	120	35	1
29	1	placebo	1	0			0	166	4	-49		29 04	4	0.391566	37		0.34	313	2	124	34	0
29	2	adalimumab	7	160	160mg_0w_80mg_2w	sc	1	159	4	-87		29 04	4	0.314465	39		0.35	313	1.9	120	35	1
31	1	placebo	1	0			0	103	2	-30.97	53.699	31 02	2	0.708738	32.6	9.8		274.71	2.712		36	0
31	2	adalimumab	7	160	160mg_0w_80mg_2w_40mg_4,6w	sc	1	102	2	-73.66	63.267	31 02	2	0.656863	33.2	10.4		272.05	2.393		37	1
31	1	placebo	1	0			0	101	4	-38.22	60.918	31 04	4	0.708738	32.6	9.8		274.71	2.712		36	0
31	2	adalimumab	7	160	160mg_0w_80mg_2w_40mg_4,6w	sc	1	101	4	-104.56	67.325	31 04	4	0.656863	33.2	10.4		272.05	2.393		37	1
33	1	placebo	1	0			0	58	8	-90		33 08	6	0.517241	34.5	9.08	0.328	288	2.5	122	38	0
33	2	vedolizumab	8	35	0.5mg/kg_q4w_0_4w	iv	2	62	8	-111		33 08	6	0.403226	36	8.75	0.468	288	1.96	131	39	2
33	3	vedolizumab	8	140	2.0mg/kg_q4w_0_4w	iv	2	65	8	-134		33 08	6	0.476923	38.5	8	0.415	297	2.46	131	40	2
33	1	placebo	1	0			0	58	26	-127		33 26	12	0.517241	34.5	9.08	0.328	288	2.5	122	38	0
33	2	vedolizumab	8	35	0.5mg/kg_q4w_0_4w	iv	2	62	26	-145		33 26	12	0.403226	36	8.75	0.468	288	1.96	131	39	2
33	3	vedolizumab	8	140	2.0mg/kg_q4w_0_4w	iv	2	65	26	-133		33 26	12	0.476923	38.5	8	0.415	297	2.46	131	40	2
44	1	placebo	1	0			0	34	1	-98.54	43.09	44 01	1	0.352941	35.7	8.2	0.294	306.4	1.71		51	0
44	2	tofacitinib	10	1	1mg_bid_4w	po	3	36	1	-87.58	45.64	44 01	1	0.694444	38.6	11.1	0.222	300.3	1.83		52	5
44	3	tofacitinib	10	5	5mg_bid_4w	po	3	34	1	-92.82	44.63	44 01	1	0.411765	38.7	10.9	0.324	297.7	1.75		53	5
44	4	tofacitinib	10	15	15mg_bid_4w	po	3	35	1	-104.18	45.51	44 01	1	0.514286	38.1	11.2	0.229	308	2.61		54	5
44	1	placebo	1	0			0	34	2	-100.15	53.17	44 02	2	0.352941	35.7	8.2	0.294	306.4	1.71		51	0
44	2	tofacitinib	10	1	1mg_bid_4w	po	3	36	2	-101.76	49.95	44 02	2	0.694444	38.6	11.1	0.222	300.3	1.83		52	5
44	3	tofacitinib	10	5	5mg_bid_4w	po	3	34	2	-103.58	51.76	44 02	2	0.411765	38.7	10.9	0.324	297.7	1.75		53	5
44	4	tofacitinib	10	15	15mg_bid_4w	po	3	35	2	-108.22	48.13	44 02	2	0.514286	38.1	11.2	0.229	308	2.61		54	5
44	1	placebo	1	0			0	34	4	-119.71	69.91	44 04	4	0.352941	35.7	8.2	0.294	306.4	1.71		51	0
44	2	tofacitinib	10	1	1mg_bid_4w	po	3	36	4	-108.82	70.51	44 04	4	0.694444	38.6	11.1	0.222	300.3	1.83		52	5
44	3	tofacitinib	10	5	5mg_bid_4w	po	3	34	4	-133.69	63.46	44 04	4	0.411765	38.7	10.9	0.324	297.7	1.75		53	5
44	4	tofacitinib	10	15	15mg_bid_4w	po	3	35	4	-112.25	65.07	44 04	4	0.514286	38.1	11.2	0.229	308	2.61		54	5
44	1	placebo	1	0			0	34	8	-110.44	59.62	44 08	6	0.352941	35.7	8.2	0.294	306.4	1.71		51	0
44	2	tofacitinib	10	1	1mg_bid_4w	po	3	36	8	-98.74	85.1	44 08	6	0.694444	38.6	11.1	0.222	300.3	1.83		52	5
44	3	tofacitinib	10	5	5mg_bid_4w	po	3	34	8	-111.85	76.63	44 08	6	0.411765	38.7	10.9	0.324	297.7	1.75		53	5
44	4	tofacitinib	10	15	15mg_bid_4w	po	3	35	8	-120.99	63.93	44 08	6	0.514286	38.1	11.2	0.229	308	2.61		54	5
45	1	placebo	1	0			0	90	2	-54.96		45 02	2	0.340659	37.2	10.8		313	0.55		55	0
45	2	tofacitinib	10	5	5mg_bid_8w	po	3	85	2	-76.4		45 02	2	0.627907	40.2	11.2		314	0.59		56	5
45	3	tofacitinib	10	10	10mg_bid_8w	po	3	86	2	-78.79		45 02	2	0.453488	39.3	11.3		320	0.55		57	5
45	1	placebo	1	0			0	90	4	-84.35		45 04	4	0.340659	37.2	10.8		313	0.55		55	0
45	2	tofacitinib	10	5	5mg_bid_8w	po	3	85	4	-100.62		45 04	4	0.627907	40.2	11.2		314	0.59		56	5
45	3	tofacitinib	10	10	10mg_bid_8w	po	3	86	4	-116.42		45 04	4	0.453488	39.3	11.3		320	0.55		57	5
45	1	placebo	1	0			0	90	8	-118.1		45 08	6	0.340659	37.2	10.8		313	0.55		55	0
45	2	tofacitinib	10	5	5mg_bid_8w	po	3	85	8	-151.23		45 08	6	0.627907	40.2	11.2		314	0.59		56	5
45	3	tofacitinib	10	10	10mg_bid_8w	po	3	86	8	-160.92		45 08	6	0.453488	39.3	11.3		320	0.55		57	5
46	1	placebo	1	0			0	44	2	-70	79.8	46 02	2	0.409091	35.1	6.8	0.27	298.6	1.98		58	0
46	2	filgotinib	11	200	200mg_qd_10w	po	3	128	2	-74.4	74.78	46 02	2	0.453846	37.4	8.8	0.3	291.3	1.42		59	5
46	1	placebo	1	0			0	44	4	-66.1	93.4	46 04	4	0.409091	35.1	6.8	0.27	298.6	1.98		58	0
46	2	filgotinib	11	200	200mg_qd_10w	po	3	128	4	-91.2	78.97	46 04	4	0.453846	37.4	8.8	0.3	291.3	1.42		59	5
46	1	placebo	1	0			0	44	6	-83.7	96.85	46 06	5	0.409091	35.1	6.8	0.27	298.6	1.98		58	0
46	2	filgotinib	11	200	200mg_qd_10w	po	3	128	6	-110.6	82.25	46 06	5	0.453846	37.4	8.8	0.3	291.3	1.42		59	5
46	1	placebo	1	0			0	44	10	-94.1	109.98	46 1	7	0.409091	35.1	6.8	0.27	298.6	1.98		58	0
46	2	filgotinib	11	200	200mg_qd_10w	po	3	128	10	-127.7	99.45	46 1	7	0.453846	37.4	8.8	0.3	291.3	1.42		59	5
49	1	placebo	1	0			0	128	2	-2.68		49 02	2	0.351562	38	9.8		320.7	2.79		64	0
49	2	abatacept	13	210	3mg/kg_0,2,4,8w	iv	2	130	2	-26.44		49 02	2	0.4	36.9	9.2		317.9	2.35		65	7
49	3	abatacept	13	700	10mg/kg_0,2,4,8w	iv	2	128	2	-22.65		49 02	2	0.390625	38.6	9.9		318.9	2.42		66	7
49	4	abatacept	13	2100	30mg/kg_0,2w_10mg/kg_4,8w	iv	2	65	2	-2.15		49 02	2	0.415385	36	8.4		320.6	2.93		67	7
49	1	placebo	1	0			0	128	4	-1.81		49 04	4	0.351562	38	9.8		320.7	2.79		64	0
49	2	abatacept	13	210	3mg/kg_0,2,4,8w	iv	2	130	4	-39.07		49 04	4	0.4	36.9	9.2		317.9	2.35		65	7
49	3	abatacept	13	700	10mg/kg_0,2,4,8w	iv	2	128	4	-39.2		49 04	4	0.390625	38.6	9.9		318.9	2.42		66	7
49	4	abatacept	13	2100	30mg/kg_0,2w_10mg/kg_4,8w	iv	2	65	4	-1.71		49 04	4	0.415385	36	8.4		320.6	2.93		67	7
49	1	placebo	1	0			0	128	8	-26.63		49 08	6	0.351562	38	9.8		320.7	2.79		64	0
49	2	abatacept	13	210	3mg/kg_0,2,4,8w	iv	2	130	8	-33.84		49 08	6	0.4	36.9	9.2		317.9	2.35		65	7
49	3	abatacept	13	700	10mg/kg_0,2,4,8w	iv	2	128	8	-47.62		49 08	6	0.390625	38.6	9.9		318.9	2.42		66	7
49	4	abatacept	13	2100	30mg/kg_0,2w_10mg/kg_4,8w	iv	2	65	8	-27.4		49 08	6	0.415385	36	8.4		320.6	2.93		67	7
49	1	placebo	1	0			0	128	12	-30.55		49 12	8	0.351562	38	9.8		320.7	2.79		64	0
49	2	abatacept	13	210	3mg/kg_0,2,4,8w	iv	2	130	12	-30.36		49 12	8	0.4	36.9	9.2		317.9	2.35		65	7
49	3	abatacept	13	700	10mg/kg_0,2,4,8w	iv	2	128	12	-37.02		49 12	8	0.390625	38.6	9.9		318.9	2.42		66	7
49	4	abatacept	13	2100	30mg/kg_0,2w_10mg/kg_4,8w	iv	2	65	12	-29.58		49 12	8	0.415385	36	8.4		320.6	2.93		67	7
50	1	placebo	1	0			0	39	4	12.44		50 04	4	0.589744	35.5	12	0.18	295.19	1.4		68	0
50	2	risankizumab	14	200	200mg_q4w_0-8w	iv	2	41	4	-72.58		50 04	4	0.634146	38.8	14	0.29	310.74	1.1		69	3
50	3	risankizumab	14	600	600mg_q4w_0-8w	iv	2	41	4	-51.12		50 04	4	0.609756	39.9	14	0.32	297.37	0.8		70	3
50	1	placebo	1	0			0	39	8	-17.83		50 08	6	0.589744	35.5	12	0.18	295.19	1.4		68	0
50	2	risankizumab	14	200	200mg_q4w_0-8w	iv	2	41	8	-47.07		50 08	6	0.634146	38.8	14	0.29	310.74	1.1		69	3
50	3	risankizumab	14	600	600mg_q4w_0-8w	iv	2	41	8	-87.31		50 08	6	0.609756	39.9	14	0.32	297.37	0.8		70	3
50	1	placebo	1	0			0	39	12	-13.48		50 12	8	0.589744	35.5	12	0.18	295.19	1.4		68	0
50	2	risankizumab	14	200	200mg_q4w_0-8w	iv	2	41	12	-68.23		50 12	8	0.634146	38.8	14	0.29	310.74	1.1		69	3
50	3	risankizumab	14	600	600mg_q4w_0-8w	iv	2	41	12	-94.78		50 12	8	0.609756	39.9	14	0.32	297.37	0.8		70	3
51	1	placebo	1	0			0	69	2	-18.9		51 02	2	0.449275	38.4	10		320.7	2.04		71	0
51	2	PF-04236921	15	10	10mg_0,4w	sc	1	67	2	-28.4		51 02	2	0.492537	38.9	11		319.9	1.64		72	3
51	3	PF-04236921	15	50	50mg_0,4w	sc	1	71	2	-16.2		51 02	2	0.380282	38.9	9.8		296.7	2.11		73	3
51	4	PF-04236921	15	200	200mg_0,4w	sc	1	40	2	-30.1		51 02	2	0.375	42.2	11.5		337.4	3.22		74	3
51	1	placebo	1	0			0	69	4	-25.1		51 04	4	0.449275	38.4	10		320.7	2.04		71	0
51	2	PF-04236921	15	10	10mg_0,4w	sc	1	67	4	-37.1		51 04	4	0.492537	38.9	11		319.9	1.64		72	3
51	3	PF-04236921	15	50	50mg_0,4w	sc	1	71	4	-50.7		51 04	4	0.380282	38.9	9.8		296.7	2.11		73	3
51	4	PF-04236921	15	200	200mg_0,4w	sc	1	40	4	-30.5		51 04	4	0.375	42.2	11.5		337.4	3.22		74	3
51	1	placebo	1	0			0	69	6	-32.6		51 06	5	0.449275	38.4	10		320.7	2.04		71	0
51	2	PF-04236921	15	10	10mg_0,4w	sc	1	67	6	-48.5		51 06	5	0.492537	38.9	11		319.9	1.64		72	3
51	3	PF-04236921	15	50	50mg_0,4w	sc	1	71	6	-54.9		51 06	5	0.380282	38.9	9.8		296.7	2.11		73	3
51	4	PF-04236921	15	200	200mg_0,4w	sc	1	40	6	-42.2		51 06	5	0.375	42.2	11.5		337.4	3.22		74	3
51	1	placebo	1	0			0	69	8	-34.6		51 08	6	0.449275	38.4	10		320.7	2.04		71	0
51	2	PF-04236921	15	10	10mg_0,4w	sc	1	67	8	-49.6		51 08	6	0.492537	38.9	11		319.9	1.64		72	3
51	3	PF-04236921	15	50	50mg_0,4w	sc	1	71	8	-63.5		51 08	6	0.380282	38.9	9.8		296.7	2.11		73	3
51	4	PF-04236921	15	200	200mg_0,4w	sc	1	40	8	-48.4		51 08	6	0.375	42.2	11.5		337.4	3.22		74	3
51	1	placebo	1	0			0	69	10	-19.8		51 1	7	0.449275	38.4	10		320.7	2.04		71	0
51	2	PF-04236921	15	10	10mg_0,4w	sc	1	67	10	-50		51 1	7	0.492537	38.9	11		319.9	1.64		72	3
51	3	PF-04236921	15	50	50mg_0,4w	sc	1	71	10	-64.7		51 1	7	0.380282	38.9	9.8		296.7	2.11		73	3
51	4	PF-04236921	15	200	200mg_0,4w	sc	1	40	10	-56.1		51 1	7	0.375	42.2	11.5		337.4	3.22		74	3
51	1	placebo	1	0			0	69	12	-27.3		51 12	8	0.449275	38.4	10		320.7	2.04		71	0
51	2	PF-04236921	15	10	10mg_0,4w	sc	1	67	12	-44.2		51 12	8	0.492537	38.9	11		319.9	1.64		72	3
51	3	PF-04236921	15	50	50mg_0,4w	sc	1	71	12	-66.8		51 12	8	0.380282	38.9	9.8		296.7	2.11		73	3
51	4	PF-04236921	15	200	200mg_0,4w	sc	1	40	12	-66.2		51 12	8	0.375	42.2	11.5		337.4	3.22		74	3
53	1	placebo	1	0			0	60	2	-37.39	76.84	53 02	2	0.383333	38.1	11.2		312.4	2.11		75	0
53	2	brazikumab	16	700	700mg_0,4w	iv	4	59	2	-38.96	88.41	53 02	2	0.372881	34.9	13.1		325	2.98		76	3
53	1	placebo	1	0			0	60	4	-49.96	86.6774	53 04	4	0.383333	38.1	11.2		312.4	2.11		75	0
53	2	brazikumab	16	700	700mg_0,4w	iv	4	59	4	-64.03	94.2477	53 04	4	0.372881	34.9	13.1		325	2.98		76	3
53	1	placebo	1	0			0	60	8	-60.5	104.88	53 08	6	0.383333	38.1	11.2		312.4	2.11		75	0
53	2	brazikumab	16	700	700mg_0,4w	iv	4	59	8	-104.25	114.987	53 08	6	0.372881	34.9	13.1		325	2.98		76	3
53	1	placebo	1	0			0	60	12	-63.55	99.8455	53 12	8	0.383333	38.1	11.2		312.4	2.11		75	0
53	2	brazikumab	16	700	700mg_0,4w	iv	4	59	12	-97.68	111.991	53 12	8	0.372881	34.9	13.1		325	2.98		76	3
55	1	placebo	1	0			0	28	2	-64.19		55 02	2	0.372093	39	6.7	0.3	303			77	0
55	2	fontolizumab	17	280	4mg/kg_0,4w	iv	2	32	2	-94.78		55 02	2	0.355556	43	6.4	0.27	300			78	9
55	3	fontolizumab	17	700	10mg/kg_0,4w	iv	2	31	2	-93.52		55 02	2	0.488889	39	7.4	0.18	303			79	9
55	1	placebo	1	0			0	28	4	-69.58		55 04	4	0.372093	39	6.7	0.3	303			77	0
55	2	fontolizumab	17	280	4mg/kg_0,4w	iv	2	32	4	-115.5		55 04	4	0.355556	43	6.4	0.27	300			78	9
55	3	fontolizumab	17	700	10mg/kg_0,4w	iv	2	31	4	-104.02		55 04	4	0.488889	39	7.4	0.18	303			79	9
55	1	placebo	1	0			0	28	6	-82.73		55 06	5	0.372093	39	6.7	0.3	303			77	0
55	2	fontolizumab	17	280	4mg/kg_0,4w	iv	2	32	6	-142		55 06	5	0.355556	43	6.4	0.27	300			78	9
55	3	fontolizumab	17	700	10mg/kg_0,4w	iv	2	31	6	-142.73		55 06	5	0.488889	39	7.4	0.18	303			79	9
55	1	placebo	1	0			0	28	8	-91.53		55 08	6	0.372093	39	6.7	0.3	303			77	0
55	2	fontolizumab	17	280	4mg/kg_0,4w	iv	2	32	8	-140.29		55 08	6	0.355556	43	6.4	0.27	300			78	9
55	3	fontolizumab	17	700	10mg/kg_0,4w	iv	2	31	8	-151.24		55 08	6	0.488889	39	7.4	0.18	303			79	9
55	1	placebo	1	0			0	28	12	-107.71		55 12	8	0.372093	39	6.7	0.3	303			77	0
55	2	fontolizumab	17	280	4mg/kg_0,4w	iv	2	32	12	-151.93		55 12	8	0.355556	43	6.4	0.27	300			78	9
55	3	fontolizumab	17	700	10mg/kg_0,4w	iv	2	31	12	-148.12		55 12	8	0.488889	39	7.4	0.18	303			79	9
55	1	placebo	1	0			0	28	16	-128.82		55 16	9	0.372093	39	6.7	0.3	303			77	0
55	2	fontolizumab	17	280	4mg/kg_0,4w	iv	2	32	16	-157.99		55 16	9	0.355556	43	6.4	0.27	300			78	9
55	3	fontolizumab	17	700	10mg/kg_0,4w	iv	2	31	16	-161.27		55 16	9	0.488889	39	7.4	0.18	303			79	9
56	1	placebo	1	0			0	40	4	-71		56 04	4	0.375	36	7.9	0.5	324.05	1.75	128.3	80	0
56	2	fontolizumab	17	70	1mg/kg_0w_0.1mg/kg_q4w_4-12w	iv-sc	4	41	4	-82.37		56 04	4	0.487805	33	9.1	0.37	327.01	2.93	122.4	81	9
56	3	fontolizumab	17	70	1mg/kg_0w_1mg/kg_q4w_4-12w	iv-sc	4	40	4	-96.76		56 04	4	0.475	34.5	10.8	0.28	323.24	2.05	128.7	82	9
56	4	fontolizumab	17	280	4mg/kg_0w_0.1mg/kg_q4w_4-12w	iv-sc	4	40	4	-85.61		56 04	4	0.5	34.5	10	0.4	312.57	1.87	131.5	83	9
56	5	fontolizumab	17	280	4mg/kg_0w_1mg/kg_4w_4-12w	iv-sc	4	40	4	-64.04		56 04	4	0.425	34	8.4	0.32	329.44	1.57	119.5	84	9
56	1	placebo	1	0			0	40	6	-87.55		56 06	5	0.375	36	7.9	0.5	324.05	1.75	128.3	80	0
56	2	fontolizumab	17	70	1mg/kg_0w_0.1mg/kg_q4w_4-12w	iv-sc	4	41	6	-74.28		56 06	5	0.487805	33	9.1	0.37	327.01	2.93	122.4	81	9
56	3	fontolizumab	17	70	1mg/kg_0w_1mg/kg_q4w_4-12w	iv-sc	4	40	6	-141.67		56 06	5	0.475	34.5	10.8	0.28	323.24	2.05	128.7	82	9
56	4	fontolizumab	17	280	4mg/kg_0w_0.1mg/kg_q4w_4-12w	iv-sc	4	40	6	-108.14		56 06	5	0.5	34.5	10	0.4	312.57	1.87	131.5	83	9
56	5	fontolizumab	17	280	4mg/kg_0w_1mg/kg_4w_4-12w	iv-sc	4	40	6	-89.49		56 06	5	0.425	34	8.4	0.32	329.44	1.57	119.5	84	9
56	1	placebo	1	0			0	40	8	-79.08		56 08	6	0.375	36	7.9	0.5	324.05	1.75	128.3	80	0
56	2	fontolizumab	17	70	1mg/kg_0w_0.1mg/kg_q4w_4-12w	iv-sc	4	41	8	-78.16		56 08	6	0.487805	33	9.1	0.37	327.01	2.93	122.4	81	9
56	3	fontolizumab	17	70	1mg/kg_0w_1mg/kg_q4w_4-12w	iv-sc	4	40	8	-129.49		56 08	6	0.475	34.5	10.8	0.28	323.24	2.05	128.7	82	9
56	4	fontolizumab	17	280	4mg/kg_0w_0.1mg/kg_q4w_4-12w	iv-sc	4	40	8	-124.53		56 08	6	0.5	34.5	10	0.4	312.57	1.87	131.5	83	9
56	5	fontolizumab	17	280	4mg/kg_0w_1mg/kg_4w_4-12w	iv-sc	4	40	8	-86.58		56 08	6	0.425	34	8.4	0.32	329.44	1.57	119.5	84	9
56	1	placebo	1	0			0	40	12	-80.22		56 12	8	0.375	36	7.9	0.5	324.05	1.75	128.3	80	0
56	2	fontolizumab	17	70	1mg/kg_0w_0.1mg/kg_q4w_4-12w	iv-sc	4	41	12	-85.12		56 12	8	0.487805	33	9.1	0.37	327.01	2.93	122.4	81	9
56	3	fontolizumab	17	70	1mg/kg_0w_1mg/kg_q4w_4-12w	iv-sc	4	40	12	-126.74		56 12	8	0.475	34.5	10.8	0.28	323.24	2.05	128.7	82	9
56	4	fontolizumab	17	280	4mg/kg_0w_0.1mg/kg_q4w_4-12w	iv-sc	4	40	12	-118.01		56 12	8	0.5	34.5	10	0.4	312.57	1.87	131.5	83	9
56	5	fontolizumab	17	280	4mg/kg_0w_1mg/kg_4w_4-12w	iv-sc	4	40	12	-111.86		56 12	8	0.425	34	8.4	0.32	329.44	1.57	119.5	84	9
56	1	placebo	1	0			0	40	16	-77.3		56 16	9	0.375	36	7.9	0.5	324.05	1.75	128.3	80	0
56	2	fontolizumab	17	70	1mg/kg_0w_0.1mg/kg_q4w_4-12w	iv-sc	4	41	16	-85.44		56 16	9	0.487805	33	9.1	0.37	327.01	2.93	122.4	81	9
56	3	fontolizumab	17	70	1mg/kg_0w_1mg/kg_q4w_4-12w	iv-sc	4	40	16	-141.99		56 16	9	0.475	34.5	10.8	0.28	323.24	2.05	128.7	82	9
56	4	fontolizumab	17	280	4mg/kg_0w_0.1mg/kg_q4w_4-12w	iv-sc	4	40	16	-123.88		56 16	9	0.5	34.5	10	0.4	312.57	1.87	131.5	83	9
56	5	fontolizumab	17	280	4mg/kg_0w_1mg/kg_4w_4-12w	iv-sc	4	40	16	-107.17		56 16	9	0.425	34	8.4	0.32	329.44	1.57	119.5	84	9
56	1	placebo	1	0			0	40	28	-69.22		56 28	13	0.375	36	7.9	0.5	324.05	1.75	128.3	80	0
56	2	fontolizumab	17	70	1mg/kg_0w_0.1mg/kg_q4w_4-12w	iv-sc	4	41	28	-69.75		56 28	13	0.487805	33	9.1	0.37	327.01	2.93	122.4	81	9
56	3	fontolizumab	17	70	1mg/kg_0w_1mg/kg_q4w_4-12w	iv-sc	4	40	28	-111.05		56 28	13	0.475	34.5	10.8	0.28	323.24	2.05	128.7	82	9
56	4	fontolizumab	17	280	4mg/kg_0w_0.1mg/kg_q4w_4-12w	iv-sc	4	40	28	-105.07		56 28	13	0.5	34.5	10	0.4	312.57	1.87	131.5	83	9
56	5	fontolizumab	17	280	4mg/kg_0w_1mg/kg_4w_4-12w	iv-sc	4	40	28	-92.78		56 28	13	0.425	34	8.4	0.32	329.44	1.57	119.5	84	9
57	1	placebo	1	0			0	98	8	-64.05	9.62	57 08	6	0.42	36.2	11.07		303.8			85	0
57	2	abrilumab	18	21	21mg_1,2,4w_q4w_0-24w	sc	1	26	8	-80.42	20.86	57 08	6	0.555556	38.9	12.58		310			86	2
57	3	abrilumab	18	70	70mg_1,2,4w_q4w_0-24w	sc	1	84	8	-91.52	11.78	57 08	6	0.4	35.6	10.69		314			87	2
57	4	abrilumab	18	210	210mg_1,2,4w_q4w_0-24w	sc	1	41	8	-87.64	19.89	57 08	6	0.452381	36.5	11.31		319.3			88	2
57	1	placebo	1	0			0	98	12	-55.32	11.41	57 12	8	0.42	36.2	11.07		303.8			85	0
57	2	abrilumab	18	21	21mg_1,2,4w_q4w_0-24w	sc	1	26	12	-92.16	21.85	57 08	8	0.555556	38.9	12.58		310			86	2
57	3	abrilumab	18	70	70mg_1,2,4w_q4w_0-24w	sc	1	84	12	-97.41	12.92	57 08	8	0.4	35.6	10.69		314			87	2
57	4	abrilumab	18	210	210mg_1,2,4w_q4w_0-24w	sc	1	41	12	-96.11	22.78	57 08	8	0.452381	36.5	11.31		319.3			88	2
58	1	placebo	1	0			0	144	12	-115.9	116.07	58 04	8	0.42	36.6	6	0.33	329.9	3.08		89	0
58	2	vercirnon	19	250	250mg_qd_12w	po	3	98	12	-134.2	99.87	58 04	8	0.47	37.2	6	0.25	340.1	2.8		90	10
58	3	vercirnon	19	500	250mg_bid_12w	po	3	96	12	-121.7	101.21	58 04	8	0.45	37.3	5	0.37	323.3	2.76		91	10
58	4	vercirnon	19	500	500mg_qd_12w	po	3	97	12	-136	102.05	58 04	8	0.51	34.9	6	0.3	332.5	3.03		92	10

## Sheet: CRP
trialNO	armNO	treatment	FLAG	DOSE	Regimen	method	methodFlag	no	week	crp	SD	group week	tp1	male	age	dur	smok	CDAI	CRP	IBDQ	group	CLASS
1	1	placebo	1	0			0	25	2	0.36		1 02	2	0.6	38.5	10.4		288	1.28	128	1	0
1	2	Infliximab	2	350	5mg/kg	iv	2	27	2	-1.79		1 02	2	0.52	37	12.5		312	2.21	122	2	1
7	1	placebo	1	0			0	170	26	-1.1	2.75	7 26	12	0.521	34	2.2	0.385	289.9	1	125.3	9	0
7	2	Infliximab	2	350	5mg/kg_0,2,6,14,22	iv	2	169	26	-1.4	2.38	7 26	12	0.529	35	2.4	0.353	287.2	1	122.1	10	1
11	1	placebo	1	0			0	249	4	0.02		11 04	4	0.41	37.7	10.025	0.19	299.5	2.34	122.5	11	0
11	2	natalizumab	3	300	300mg_0,4,8	iv	2	258	4	-0.73		11 04	4	0.41	38.1	10.17	0.22	303.9	2.3	123.6	12	2
11	1	placebo	1	0			0	249	8	0.03		11 08	6	0.41	37.7	10.025	0.19	299.5	2.34	122.5	11	0
11	2	natalizumab	3	300	300mg_0,4,8	iv	2	258	8	-0.91		11 08	6	0.41	38.1	10.17	0.22	303.9	2.3	123.6	12	2
11	1	placebo	1	0			0	249	12	0.07		11 12	8	0.41	37.7	10.025	0.19	299.5	2.34	122.5	11	0
11	2	natalizumab	3	300	300mg_0,4,8	iv	2	258	12	-0.86		11 12	8	0.41	38.1	10.17	0.22	303.9	2.3	123.6	12	2
16	1	placebo	1	0			0	132	4	0.133		16 04	4	0.326	37.7	8.4		300	0.75	124	15	0
16	2	CDP571	4	700	10mg/kg_q8w_0-24w	iv	2	263	4	-0.237		16 04	4	0.399	37.9	9.1		293	0.67	129	16	1
16	1	placebo	1	0			0	132	8	0.112		16 08	6	0.326	37.7	8.4		300	0.75	124	15	0
16	2	CDP571	4	700	10mg/kg_q8w_0-24w	iv	2	263	8	-0.073		16 08	6	0.399	37.9	9.1		293	0.67	129	16	1
16	1	placebo	1	0			0	132	16	0.173		16 16	9	0.326	37.7	8.4		300	0.75	124	15	0
16	2	CDP571	4	700	10mg/kg_q8w_0-24w	iv	2	263	16	-0.026		16 16	9	0.399	37.9	9.1		293	0.67	129	16	1
16	1	placebo	1	0			0	132	28	0.193		16 28	13	0.326	37.7	8.4		300	0.75	124	15	0
16	2	CDP571	4	700	10mg/kg_q8w_0-24w	iv	2	263	28	-0.1		16 28	13	0.399	37.9	9.1		293	0.67	129	16	1
21	1	placebo	1	0			0	73	2	-0.009		21 02	2	0.329	35.8	7.95				122.9	21	0
21	2	certolizumab	5	100	100mg_q4w_0-8w	sc	1	74	2	-0.295		21 02	2	0.473	33.5	7.73				132.2	22	1
21	3	certolizumab	5	200	200mg_q4w_0-8w	sc	1	72	2	-0.276		21 02	2	0.306	40.1	8.84				122.9	23	1
21	4	certolizumab	5	400	400mg_q4w_0-8w	sc	1	72	2	-0.489		21 02	2	0.404	35.9	8.43				126.5	24	1
21	1	placebo	1	0			0	73	4	0.019		21 04	4	0.329	35.8	7.95				122.9	21	0
21	2	certolizumab	5	100	100mg_q4w_0-8w	sc	1	74	4	-0.148		21 04	4	0.473	33.5	7.73				132.2	22	1
21	3	certolizumab	5	200	200mg_q4w_0-8w	sc	1	72	4	-0.253		21 04	4	0.306	40.1	8.84				122.9	23	1
21	4	certolizumab	5	400	400mg_q4w_0-8w	sc	1	72	4	-0.426		21 04	4	0.404	35.9	8.43				126.5	24	1
21	1	placebo	1	0			0	73	6	0.047		21 06	5	0.329	35.8	7.95				122.9	21	0
21	2	certolizumab	5	100	100mg_q4w_0-8w	sc	1	74	6	-0.16		21 06	5	0.473	33.5	7.73				132.2	22	1
21	3	certolizumab	5	200	200mg_q4w_0-8w	sc	1	72	6	-0.274		21 06	5	0.306	40.1	8.84				122.9	23	1
21	4	certolizumab	5	400	400mg_q4w_0-8w	sc	1	72	6	-0.379		21 06	5	0.404	35.9	8.43				126.5	24	1
21	1	placebo	1	0			0	73	8	0.062		21 08	6	0.329	35.8	7.95				122.9	21	0
21	2	certolizumab	5	100	100mg_q4w_0-8w	sc	1	74	8	-0.018		21 08	6	0.473	33.5	7.73				132.2	22	1
21	3	certolizumab	5	200	200mg_q4w_0-8w	sc	1	72	8	-0.194		21 08	6	0.306	40.1	8.84				122.9	23	1
21	4	certolizumab	5	400	400mg_q4w_0-8w	sc	1	72	8	-0.351		21 08	6	0.404	35.9	8.43				126.5	24	1
21	1	placebo	1	0			0	73	10	0.037		21 1	7	0.329	35.8	7.95				122.9	21	0
21	2	certolizumab	5	100	100mg_q4w_0-8w	sc	1	74	10	-0.102		21 1	7	0.473	33.5	7.73				132.2	22	1
21	3	certolizumab	5	200	200mg_q4w_0-8w	sc	1	72	10	-0.252		21 1	7	0.306	40.1	8.84				122.9	23	1
21	4	certolizumab	5	400	400mg_q4w_0-8w	sc	1	72	10	-0.353		21 1	7	0.404	35.9	8.43				126.5	24	1
21	1	placebo	1	0			0	73	12	-0.056		21 12	8	0.329	35.8	7.95				122.9	21	0
21	2	certolizumab	5	100	100mg_q4w_0-8w	sc	1	74	12	0.055		21 12	8	0.473	33.5	7.73				132.2	22	1
21	3	certolizumab	5	200	200mg_q4w_0-8w	sc	1	72	12	-0.143		21 12	8	0.306	40.1	8.84				122.9	23	1
21	4	certolizumab	5	400	400mg_q4w_0-8w	sc	1	72	12	-0.32		21 12	8	0.404	35.9	8.43				126.5	24	1
22	1	placebo	1	0			0	198	2	-0.022		22 02	2	0.418605	38.8	7		293	0.902	122.1	25	0
22	2	certolizumab	5	400	400mg_q2w_0-4w	sc	1	204	2	-0.309		22 02	2	0.470852	36.3	7.5		293	0.941	126.5	26	1
22	1	placebo	1	0			0	184	4	-0.106		22 04	4	0.418605	38.8	7		293	0.902	122.1	25	0
22	2	certolizumab	5	400	400mg_q2w_0-4w	sc	1	198	4	-0.312		22 04	4	0.470852	36.3	7.5		293	0.941	126.5	26	1
22	1	placebo	1	0			0	183	6	-0.117		22 06	5	0.418605	38.8	7		293	0.902	122.1	25	0
22	2	certolizumab	5	400	400mg_q2w_0-4w	sc	1	192	6	-0.255		22 06	5	0.470852	36.3	7.5		293	0.941	126.5	26	1
23	1	placebo	1	0			0	215	2	-0.043		23 02	2	0.39939	28	8	0.33	284.3	0.902		27	0
23	2	certolizumab	5	400	400mg_0,2,4w_q4w_8-26w	sc	1	223	2	-0.296		23 02	2	0.47432	37	7	0.31	284.7	0.82		28	1
23	1	placebo	1	0			0	215	4	0.013		23 04	4	0.39939	28	8	0.33	284.3	0.902		27	0
23	2	certolizumab	5	400	400mg_0,2,4w_q4w_8-26w	sc	1	223	4	-0.273		23 04	4	0.47432	37	7	0.31	284.7	0.82		28	1
23	1	placebo	1	0			0	215	6	0.036		23 06	5	0.39939	28	8	0.33	284.3	0.902		27	0
23	2	certolizumab	5	400	400mg_0,2,4w_q4w_8-26w	sc	1	223	6	-0.252		23 06	5	0.47432	37	7	0.31	284.7	0.82		28	1
23	1	placebo	1	0			0	215	8	0.015		23 08	6	0.39939	28	8	0.33	284.3	0.902		27	0
23	2	certolizumab	5	400	400mg_0,2,4w_q4w_8-26w	sc	1	223	8	-0.215		23 08	6	0.47432	37	7	0.31	284.7	0.82		28	1
23	1	placebo	1	0			0	215	12	0.087		23 12	8	0.39939	28	8	0.33	284.3	0.902		27	0
23	2	certolizumab	5	400	400mg_0,2,4w_q4w_8-26w	sc	1	223	12	-0.167		23 12	8	0.47432	37	7	0.31	284.7	0.82		28	1
23	1	placebo	1	0			0	215	16	0.037		23 16	9	0.39939	28	8	0.33	284.3	0.902		27	0
23	2	certolizumab	5	400	400mg_0,2,4w_q4w_8-26w	sc	1	223	16	-0.167		23 16	9	0.47432	37	7	0.31	284.7	0.82		28	1
23	1	placebo	1	0			0	215	20	0.052		23 2	10	0.39939	28	8	0.33	284.3	0.902		27	0
23	2	certolizumab	5	400	400mg_0,2,4w_q4w_8-26w	sc	1	223	20	-0.127		23 2	10	0.47432	37	7	0.31	284.7	0.82		28	1
23	1	placebo	1	0			0	215	24	0.074		23 24	11	0.39939	28	8	0.33	284.3	0.902		27	0
23	2	certolizumab	5	400	400mg_0,2,4w_q4w_8-26w	sc	1	223	24	-0.128		23 24	11	0.47432	37	7	0.31	284.7	0.82		28	1
23	1	placebo	1	0			0	215	26	0.096		23 26	12	0.39939	28	8	0.33	284.3	0.902		27	0
23	2	certolizumab	5	400	400mg_0,2,4w_q4w_8-26w	sc	1	223	26	-0.167		23 26	12	0.47432	37	7	0.31	284.7	0.82		28	1
26	1	placebo	1	0			0	74	1	-0.1		26 01	1	0.5	37		0.38	295.7	1.8	126.9	29	0
26	2	adalimumab	6	40	40mg_0w_20mg_2w	sc	1	74	1	-0.6		26 01	1	0.527027	39		0.34	298	1.6	129.9	30	1
26	3	adalimumab	6	80	80mg_0w_40mg_2w	sc	1	75	1	-0.6		26 01	1	0.333333	38		0.43	300.7	2	126.9	31	1
26	4	adalimumab	6	160	160mg_0w_80mg_2w	sc	1	76	1	-0.5		26 01	1	0.473684	39		0.42	295.4	1.4	125.1	32	1
26	1	placebo	1	0			0	74	2	-0.2		26 02	2	0.5	37		0.38	295.7	1.8	126.9	29	0
26	2	adalimumab	6	40	40mg_0w_20mg_2w	sc	1	74	2	-0.5		26 02	2	0.527027	39		0.34	298	1.6	129.9	30	1
26	3	adalimumab	6	80	80mg_0w_40mg_2w	sc	1	75	2	-0.6		26 02	2	0.333333	38		0.43	300.7	2	126.9	31	1
26	4	adalimumab	6	160	160mg_0w_80mg_2w	sc	1	76	2	-0.5		26 02	2	0.473684	39		0.42	295.4	1.4	125.1	32	1
26	1	placebo	1	0			0	74	4	-0.1		26 04	4	0.5	37		0.38	295.7	1.8	126.9	29	0
26	2	adalimumab	6	40	40mg_0w_20mg_2w	sc	1	74	4	-0.6		26 04	4	0.527027	39		0.34	298	1.6	129.9	30	1
26	3	adalimumab	6	80	80mg_0w_40mg_2w	sc	1	75	4	-0.5		26 04	4	0.333333	38		0.43	300.7	2	126.9	31	1
26	4	adalimumab	6	160	160mg_0w_80mg_2w	sc	1	76	4	-0.5		26 04	4	0.473684	39		0.42	295.4	1.4	125.1	32	1
29	1	placebo	1	0			0	166	4	0		29 04	4	0.391566	37		0.34	313	2	124	33	0
29	2	adalimumab	6	160	160mg_0w_80mg_2w	sc	1	159	4	-0.4		29 04	4	0.314465	39		0.35	313	1.9	120	34	1
31	1	placebo	1	0			0	103	2	-0.4149	2.21944	31 02	2	0.708738	32.6	9.8		274.71	2.712		35	0
31	2	adalimumab	6	160	160mg_0 80mg_2 40mg_4	sc	1	102	2	-1.6474	2.55491	31 02	2	0.656863	33.2	10.4		272.05	2.393		36	1
31	1	placebo	1	0			0	101	4	-0.1131	1.88392	31 04	4	0.708738	32.6	9.8		274.71	2.712		35	0
31	2	adalimumab	6	160	160mg_0 80mg_2 40mg_4	sc	1	101	4	-1.667	1.99088	31 04	4	0.656863	33.2	10.4		272.05	2.393		36	1
34	1	placebo	1	0			0	127	6	-0.547		34 06	5	0.46622	38.6	8.2	0.23	325	2.713		37	0
34	2	vedolizumab	7	300	300mg_0,2	iv	2	183	6	-0.382		34 06	5	0.47727	36.3	9.2	0.245	327	2.874		38	2
36	1	placebo	1	0			0	78	2	-0.125	2.8417	36 02	2	0.52	32.6	8.35	0.141	295	2.848		39	0
36	2	vedolizumab	7	300	300mg_0,2,6	iv	2	79	2	0.022	2.1421	36 02	2	0.51	33.9	7.2	0.165	303.9	2.234		40	2
36	1	placebo	1	0			0	78	6	0.13	2.1674	36 06	5	0.52	32.6	8.35	0.141	295	2.848		39	0
36	2	vedolizumab	7	300	300mg_0,2,6	iv	2	79	6	-0.089	2.0266	36 06	5	0.51	33.9	7.2	0.165	303.9	2.234		40	2
36	1	placebo	1	0			0	78	10	0.077	2.869	36 1	7	0.52	32.6	8.35	0.141	295	2.848		39	0
36	2	vedolizumab	7	300	300mg_0,2,6	iv	2	79	10	-0.164	2.2729	36 1	7	0.51	33.9	7.2	0.165	303.9	2.234		40	2
37	1	placebo	1	0			0	26	8	0.3		37 08	6	0.576923	37	13	0.27	292	1.2		41	0
37	2	ustekinumab	8	1.5	90mg_qw_0-3w	sc	1	25	8	-0.5		37 08	6	0.6	37	12	0.4	311	1.7		42	3
41	1	placebo	1	0			0	55	4	0.23	2.5	41 04	4	0.44	35	11		324	1.8	115	53	0
41	3	semapimod	9	180	60mg_3d	iv	2	51	4	0.02	7.6	41 04	4	0.53	37	10.3		311	3.6	122	55	1
41	1	placebo	1	0			0	55	8	0.22	2.4	41 08	6	0.44	35	11		324	1.8	115	53	0
41	3	semapimod	9	180	60mg_3d	iv	2	51	8	0.46	11.3	41 08	6	0.53	37	10.3		311	3.6	122	55	1
44	1	placebo	1	0			0	30	1	0.104081	0.189648	44 01	1	0.352941	35.7	8.2	0.294	306.4	1.71		56	0
44	2	tofacitinib	10	1	1mg_bid_4w	po	3	31	1	-0.127125	0.215977	44 01	1	0.694444	38.6	11.1	0.222	300.3	1.83		57	5
44	3	tofacitinib	10	5	5mg_bid_4w	po	3	27	1	-0.168203	0.277319	44 01	1	0.411765	38.7	10.9	0.324	297.7	1.75		58	5
44	4	tofacitinib	10	15	15mg_bid_4w	po	3	31	1	-0.195424	0.332012	44 01	1	0.514286	38.1	11.2	0.229	308	2.61		59	5
44	1	placebo	1	0			0	29	2	-0.109417	0.277319	44 02	2	0.352941	35.7	8.2	0.294	306.4	1.71		56	0
44	2	tofacitinib	10	1	1mg_bid_4w	po	3	31	2	-0.155271	0.231637	44 02	2	0.694444	38.6	11.1	0.222	300.3	1.83		57	5
44	3	tofacitinib	10	5	5mg_bid_4w	po	3	27	2	-0.159999	0.309566	44 02	2	0.411765	38.7	10.9	0.324	297.7	1.75		58	5
44	4	tofacitinib	10	15	15mg_bid_4w	po	3	31	2	-0.224791	0.434924	44 02	2	0.514286	38.1	11.2	0.229	308	2.61		59	5
44	1	placebo	1	0			0	26	4	-0.107251	0.238691	44 04	4	0.352941	35.7	8.2	0.294	306.4	1.71		56	0
44	2	tofacitinib	10	1	1mg_bid_4w	po	3	30	4	-0.123368	0.231637	44 04	4	0.694444	38.6	11.1	0.222	300.3	1.83		57	5
44	3	tofacitinib	10	5	5mg_bid_4w	po	3	28	4	-0.152196	0.277319	44 04	4	0.411765	38.7	10.9	0.324	297.7	1.75		58	5
44	4	tofacitinib	10	15	15mg_bid_4w	po	3	30	4	-0.253451	0.495303	44 04	4	0.514286	38.1	11.2	0.229	308	2.61		59	5
44	1	placebo	1	0			0	26	8	-0.180399	0.370617	44 08	6	0.352941	35.7	8.2	0.294	306.4	1.71		56	0
44	2	tofacitinib	10	1	1mg_bid_4w	po	3	28	8	-0.132313	0.306485	44 08	6	0.694444	38.6	11.1	0.222	300.3	1.83		57	5
44	3	tofacitinib	10	5	5mg_bid_4w	po	3	26	8	-0.107251	0.385743	44 08	6	0.411765	38.7	10.9	0.324	297.7	1.75		58	5
44	4	tofacitinib	10	15	15mg_bid_4w	po	3	29	8	0.11275	0.36693	44 08	6	0.514286	38.1	11.2	0.229	308	2.61		59	5
45	1	placebo	1	0			0	90	8	0.11275	0.312677	45 08	6	0.340659	37.2	10.8		313	0.55		60	0
45	2	tofacitinib	10	5	5mg_bid_8w	po	3	85	8	-0.152196	0.303436	45 08	6	0.627907	40.2	11.2		314	0.59		61	5
45	3	tofacitinib	10	10	10mg_bid_8w	po	3	86	8	-0.207508	0.300417	45 08	6	0.453488	39.3	11.3		320	0.55		62	5
49	1	placebo	1	0			0	128	2	-0.059		49 02	2	0.351562	38	9.8		320.7	2.79		65	0
49	2	abatacept	11	210	3mg/kg_0,2,4,8w	iv	2	130	2	0.387		49 02	2	0.4	36.9	9.2		317.9	2.35		66	7
49	3	abatacept	11	700	10mg/kg_0,2,4,8w	iv	2	128	2	0.582		49 02	2	0.390625	38.6	9.9		318.9	2.42		67	7
49	4	abatacept	11	2100	30mg/kg_0,2w_10mg/kg_4,8w	iv	2	65	2	0.291		49 02	2	0.415385	36	8.4		320.6	2.93		68	7
49	1	placebo	1	0			0	128	4	0.039		49 04	4	0.351562	38	9.8		320.7	2.79		65	0
49	2	abatacept	11	210	3mg/kg_0,2,4,8w	iv	2	130	4	0.526		49 04	4	0.4	36.9	9.2		317.9	2.35		66	7
49	3	abatacept	11	700	10mg/kg_0,2,4,8w	iv	2	128	4	-0.401		49 04	4	0.390625	38.6	9.9		318.9	2.42		67	7
49	4	abatacept	11	2100	30mg/kg_0,2w_10mg/kg_4,8w	iv	2	65	4	0.795		49 04	4	0.415385	36	8.4		320.6	2.93		68	7
49	1	placebo	1	0			0	128	8	-0.395		49 08	6	0.351562	38	9.8		320.7	2.79		65	0
49	2	abatacept	11	210	3mg/kg_0,2,4,8w	iv	2	130	8	0.259		49 08	6	0.4	36.9	9.2		317.9	2.35		66	7
49	3	abatacept	11	700	10mg/kg_0,2,4,8w	iv	2	128	8	0.036		49 08	6	0.390625	38.6	9.9		318.9	2.42		67	7
49	4	abatacept	11	2100	30mg/kg_0,2w_10mg/kg_4,8w	iv	2	65	8	-0.277		49 08	6	0.415385	36	8.4		320.6	2.93		68	7
49	1	placebo	1	0			0	128	12	-0.418		49 12	8	0.351562	38	9.8		320.7	2.79		65	0
49	2	abatacept	11	210	3mg/kg_0,2,4,8w	iv	2	130	12	0.425		49 12	8	0.4	36.9	9.2		317.9	2.35		66	7
49	3	abatacept	11	700	10mg/kg_0,2,4,8w	iv	2	128	12	0.105		49 12	8	0.390625	38.6	9.9		318.9	2.42		67	7
49	4	abatacept	11	2100	30mg/kg_0,2w_10mg/kg_4,8w	iv	2	65	12	-0.47		49 12	8	0.415385	36	8.4		320.6	2.93		68	7
50	1	placebo	1	0			0	39	4	-0.587294		50 04	4	0.589744	35.5	12	0.18	295.19	1.4		69	0
50	2	risankizumab	17	200	200mg_q4w_0-8w	iv	2	41	4	-0.377656		50 04	4	0.634146	38.8	14	0.29	310.74	1.1		70	3
50	3	risankizumab	17	600	600mg_q4w_0-8w	iv	2	41	4	-0.362851		50 04	4	0.609756	39.9	14	0.32	297.37	0.8		71	3
50	1	placebo	1	0			0	39	8	-0.647014		50 08	6	0.589744	35.5	12	0.18	295.19	1.4		69	0
50	2	risankizumab	17	200	200mg_q4w_0-8w	iv	2	41	8	-0.770174		50 08	6	0.634146	38.8	14	0.29	310.74	1.1		70	3
50	3	risankizumab	17	600	600mg_q4w_0-8w	iv	2	41	8	-0.509838		50 08	6	0.609756	39.9	14	0.32	297.37	0.8		71	3
50	1	placebo	1	0			0	39	12	-0.151044		50 12	8	0.589744	35.5	12	0.18	295.19	1.4		69	0
50	2	risankizumab	17	200	200mg_q4w_0-8w	iv	2	41	12	-0.490982		50 12	8	0.634146	38.8	14	0.29	310.74	1.1		70	3
50	3	risankizumab	17	600	600mg_q4w_0-8w	iv	2	41	12	-0.570332		50 12	8	0.609756	39.9	14	0.32	297.37	0.8		71	3
51	1	placebo	1	0			0	69	2	0.116		51 02	2	0.449275	38.4	10		320.7	2.04		72	0
51	2	PF-04236921	12	10	10mg_q4w_0,4w	sc	1	67	2	-1.367		51 02	2	0.492537	38.9	11		319.9	1.64		73	3
51	3	PF-04236921	12	50	50mg_q4w_0,4w	sc	1	71	2	-2.011		51 02	2	0.380282	38.9	9.8		296.7	2.11		74	3
51	4	PF-04236921	12	200	200mg_q4w-0,4w	sc	1	40	2	-3.181		51 02	2	0.375	42.2	11.5		337.4	3.22		75	3
51	1	placebo	1	0			0	69	4	-0.198		51 04	4	0.449275	38.4	10		320.7	2.04		72	0
51	2	PF-04236921	12	10	10mg_q4w_0,4w	sc	1	67	4	-1.153		51 04	4	0.492537	38.9	11		319.9	1.64		73	3
51	3	PF-04236921	12	50	50mg_q4w_0,4w	sc	1	71	4	-1.933		51 04	4	0.380282	38.9	9.8		296.7	2.11		74	3
51	4	PF-04236921	12	200	200mg_q4w-0,4w	sc	1	40	4	-3.127		51 04	4	0.375	42.2	11.5		337.4	3.22		75	3
51	1	placebo	1	0			0	69	6	-0.165		51 06	5	0.449275	38.4	10		320.7	2.04		72	0
51	2	PF-04236921	12	10	10mg_q4w_0,4w	sc	1	67	6	-1.445		51 06	5	0.492537	38.9	11		319.9	1.64		73	3
51	3	PF-04236921	12	50	50mg_q4w_0,4w	sc	1	71	6	-2.023		51 06	5	0.380282	38.9	9.8		296.7	2.11		74	3
51	4	PF-04236921	12	200	200mg_q4w-0,4w	sc	1	40	6	-3.175		51 06	5	0.375	42.2	11.5		337.4	3.22		75	3
51	1	placebo	1	0			0	69	8	0.129		51 08	6	0.449275	38.4	10		320.7	2.04		72	0
51	2	PF-04236921	12	10	10mg_q4w_0,4w	sc	1	67	8	-1.327		51 08	6	0.492537	38.9	11		319.9	1.64		73	3
51	3	PF-04236921	12	50	50mg_q4w_0,4w	sc	1	71	8	-1.975		51 08	6	0.380282	38.9	9.8		296.7	2.11		74	3
51	4	PF-04236921	12	200	200mg_q4w-0,4w	sc	1	40	8	-3.156		51 08	6	0.375	42.2	11.5		337.4	3.22		75	3
51	1	placebo	1	0			0	69	10	0.292		51 1	7	0.449275	38.4	10		320.7	2.04		72	0
51	2	PF-04236921	12	10	10mg_q4w_0,4w	sc	1	67	10	-1.205		51 1	7	0.492537	38.9	11		319.9	1.64		73	3
51	3	PF-04236921	12	50	50mg_q4w_0,4w	sc	1	71	10	-1.867		51 1	7	0.380282	38.9	9.8		296.7	2.11		74	3
51	4	PF-04236921	12	200	200mg_q4w-0,4w	sc	1	40	10	-3.13		51 1	7	0.375	42.2	11.5		337.4	3.22		75	3
51	1	placebo	1	0			0	69	12	-0.243		51 12	8	0.449275	38.4	10		320.7	2.04		72	0
51	2	PF-04236921	12	10	10mg_q4w_0,4w	sc	1	67	12	-1.091		51 12	8	0.492537	38.9	11		319.9	1.64		73	3
51	3	PF-04236921	12	50	50mg_q4w_0,4w	sc	1	71	12	-1.812		51 12	8	0.380282	38.9	9.8		296.7	2.11		74	3
51	4	PF-04236921	12	200	200mg_q4w-0,4w	sc	1	40	12	-3.172		51 12	8	0.375	42.2	11.5		337.4	3.22		75	3
52	1	placebo	1	0			0	63	4	-0.35		52 04	4	0.52381	34.4	11.5	0.302	313.1	1.89		76	0
52	2	PF-00547659	18	22.5	22.5mg_q4w_0-8w	sc	1	66	4	-0.392		52 04	4	0.272727	37.3	12.7	0.333	307.4	2.11		77	8
52	3	PF-00547659	18	75	75mg_q4w_0-8w	sc	1	65	4	-0.122		52 04	4	0.461538	34.4	11.4	0.323	324.1	1.46		78	8
52	4	PF-00547659	18	225	225mg_q4w_0-8w	sc	1	68	4	-0.313		52 04	4	0.367647	35.9	12	0.309	316.4	1.72		79	8
52	1	placebo	1	0			0	63	8	-0.301		52 08	6	0.52381	34.4	11.5	0.302	313.1	1.89		76	0
52	2	PF-00547659	18	22.5	22.5mg_q4w_0-8w	sc	1	66	8	-0.368		52 08	6	0.272727	37.3	12.7	0.333	307.4	2.11		77	8
52	3	PF-00547659	18	75	75mg_q4w_0-8w	sc	1	65	8	-0.382		52 08	6	0.461538	34.4	11.4	0.323	324.1	1.46		78	8
52	4	PF-00547659	18	225	225mg_q4w_0-8w	sc	1	68	8	-0.504		52 08	6	0.367647	35.9	12	0.309	316.4	1.72		79	8
52	1	placebo	1	0			0	63	12	0.521		52 12	8	0.52381	34.4	11.5	0.302	313.1	1.89		76	0
52	2	PF-00547659	18	22.5	22.5mg_q4w_0-8w	sc	1	66	12	-0.652		52 12	8	0.272727	37.3	12.7	0.333	307.4	2.11		77	8
52	3	PF-00547659	18	75	75mg_q4w_0-8w	sc	1	65	12	-0.323		52 12	8	0.461538	34.4	11.4	0.323	324.1	1.46		78	8
52	4	PF-00547659	18	225	225mg_q4w_0-8w	sc	1	68	12	-0.303		52 12	8	0.367647	35.9	12	0.309	316.4	1.72		79	8
54	1	placebo	1	0			0	37	16	-0.01	1.2	54 16	9	0.351351	40.5	8.7		276	0.7		80	0
54	2	upadacitinib	13	3	3mg_bid_16w	po	3	39	16	-0.3	1.96	54 16	9	0.512821	39.7	10.7		288	0.6		81	5
54	3	upadacitinib	13	6	6mg_bid_16w	po	3	37	16	-0.39	1.95	54 16	9	0.432432	40.5	8.8		296	1.17		82	5
54	4	upadacitinib	13	12	12mg_bid_16w	po	3	36	16	-0.61	2.7	54 16	9	0.527778	40.8	9.1		280	1.66		83	5
54	5	upadacitinib	13	12	24mg_qd_16w	po	3	35	16	-0.27	1.37	54 16	9	0.457143	40.2	10.8		305	0.74		84	5
54	6	upadacitinib	13	24	24mg_bid_16w	po	3	36	16	-1.48	2.64	54 16	9	0.305556	42.5	14.1		277.5	0.59		85	5
55	1	placebo	1	0			0	28	2	-0.005		55 02	2	0.372093	39	6.7	0.3	303			86	0
55	2	fontolizumab	14	280	4mg/kg_0,4w	iv	2	32	2	-0.09		55 02	2	0.355556	43	6.4	0.27	300			87	9
55	3	fontolizumab	14	700	10mg/kg_0,4w	iv	2	31	2	-0.14		55 02	2	0.488889	39	7.4	0.18	303			88	9
55	1	placebo	1	0			0	28	4	0.02		55 04	4	0.372093	39	6.7	0.3	303			86	0
55	2	fontolizumab	14	280	4mg/kg_0,4w	iv	2	32	4	-0.04		55 04	4	0.355556	43	6.4	0.27	300			87	9
55	3	fontolizumab	14	700	10mg/kg_0,4w	iv	2	31	4	-0.49		55 04	4	0.488889	39	7.4	0.18	303			88	9
55	1	placebo	1	0			0	28	6	0.09		55 06	5	0.372093	39	6.7	0.3	303			86	0
55	2	fontolizumab	14	280	4mg/kg_0,4w	iv	2	32	6	-0.155		55 06	5	0.355556	43	6.4	0.27	300			87	9
55	3	fontolizumab	14	700	10mg/kg_0,4w	iv	2	31	6	-0.1		55 06	5	0.488889	39	7.4	0.18	303			88	9
55	1	placebo	1	0			0	28	8	0		55 08	6	0.372093	39	6.7	0.3	303			86	0
55	2	fontolizumab	14	280	4mg/kg_0,4w	iv	2	32	8	-0.07		55 08	6	0.355556	43	6.4	0.27	300			87	9
55	3	fontolizumab	14	700	10mg/kg_0,4w	iv	2	31	8	-0.11		55 08	6	0.488889	39	7.4	0.18	303			88	9
55	1	placebo	1	0			0	28	12	0.01		55 12	8	0.372093	39	6.7	0.3	303			86	0
55	2	fontolizumab	14	280	4mg/kg_0,4w	iv	2	32	12	0		55 12	8	0.355556	43	6.4	0.27	300			87	9
55	3	fontolizumab	14	700	10mg/kg_0,4w	iv	2	31	12	-0.21		55 12	8	0.488889	39	7.4	0.18	303			88	9
55	1	placebo	1	0			0	28	16	0.005		55 16	9	0.372093	39	6.7	0.3	303			86	0
55	2	fontolizumab	14	280	4mg/kg_0,4w	iv	2	32	16	-0.01		55 16	9	0.355556	43	6.4	0.27	300			87	9
55	3	fontolizumab	14	700	10mg/kg_0,4w	iv	2	31	16	-0.055		55 16	9	0.488889	39	7.4	0.18	303			88	9
56	1	placebo	1	0			0	35	4	0		56 04	4	0.375	36	7.9	0.5	324.05	1.75	128.3	89	0
56	2	fontolizumab	14	70	1mg/kg_0 0.1mg/kg_4,8,12w	iv-sc	4	34	4	-0.14		56 04	4	0.487805	33	9.1	0.37	327.01	2.93	122.4	90	9
56	3	fontolizumab	14	70	1mg/kg_0 1mg/kg_4,8,12w	iv-sc	4	38	4	-0.34		56 04	4	0.475	34.5	10.8	0.28	323.24	2.05	128.7	91	9
56	4	fontolizumab	14	280	4mg/kg_0 0.1mg/kg_4,8,12w	iv-sc	4	38	4	-0.41		56 04	4	0.5	34.5	10	0.4	312.57	1.87	131.5	92	9
56	5	fontolizumab	14	280	4mg/kg_0 1mg/kg_4,8,12w	iv-sc	4	38	4	-0.25		56 04	4	0.425	34	8.4	0.32	329.44	1.57	119.5	93	9
56	1	placebo	1	0			0	33	6	0		56 06	5	0.375	36	7.9	0.5	324.05	1.75	128.3	89	0
56	2	fontolizumab	14	70	1mg/kg_0 0.1mg/kg_4,8,12w	iv-sc	4	34	6	-0.25		56 06	5	0.487805	33	9.1	0.37	327.01	2.93	122.4	90	9
56	3	fontolizumab	14	70	1mg/kg_0 1mg/kg_4,8,12w	iv-sc	4	36	6	-0.55		56 06	5	0.475	34.5	10.8	0.28	323.24	2.05	128.7	91	9
56	4	fontolizumab	14	280	4mg/kg_0 0.1mg/kg_4,8,12w	iv-sc	4	37	6	-0.21		56 06	5	0.5	34.5	10	0.4	312.57	1.87	131.5	92	9
56	5	fontolizumab	14	280	4mg/kg_0 1mg/kg_4,8,12w	iv-sc	4	34	6	-0.31		56 06	5	0.425	34	8.4	0.32	329.44	1.57	119.5	93	9
56	1	placebo	1	0			0	32	8	0.05		56 08	6	0.375	36	7.9	0.5	324.05	1.75	128.3	89	0
56	2	fontolizumab	14	70	1mg/kg_0 0.1mg/kg_4,8,12w	iv-sc	4	34	8	-0.01		56 08	6	0.487805	33	9.1	0.37	327.01	2.93	122.4	90	9
56	3	fontolizumab	14	70	1mg/kg_0 1mg/kg_4,8,12w	iv-sc	4	36	8	-0.51		56 08	6	0.475	34.5	10.8	0.28	323.24	2.05	128.7	91	9
56	4	fontolizumab	14	280	4mg/kg_0 0.1mg/kg_4,8,12w	iv-sc	4	36	8	-0.22		56 08	6	0.5	34.5	10	0.4	312.57	1.87	131.5	92	9
56	5	fontolizumab	14	280	4mg/kg_0 1mg/kg_4,8,12w	iv-sc	4	32	8	-0.28		56 08	6	0.425	34	8.4	0.32	329.44	1.57	119.5	93	9
56	1	placebo	1	0			0	32	12	0.01		56 12	8	0.375	36	7.9	0.5	324.05	1.75	128.3	89	0
56	2	fontolizumab	14	70	1mg/kg_0 0.1mg/kg_4,8,12w	iv-sc	4	31	12	-0.3		56 12	8	0.487805	33	9.1	0.37	327.01	2.93	122.4	90	9
56	3	fontolizumab	14	70	1mg/kg_0 1mg/kg_4,8,12w	iv-sc	4	35	12	-0.3		56 12	8	0.475	34.5	10.8	0.28	323.24	2.05	128.7	91	9
56	4	fontolizumab	14	280	4mg/kg_0 0.1mg/kg_4,8,12w	iv-sc	4	34	12	-0.3		56 12	8	0.5	34.5	10	0.4	312.57	1.87	131.5	92	9
56	5	fontolizumab	14	280	4mg/kg_0 1mg/kg_4,8,12w	iv-sc	4	32	12	-0.35		56 12	8	0.425	34	8.4	0.32	329.44	1.57	119.5	93	9
56	1	placebo	1	0			0	29	16	0.04		56 16	9	0.375	36	7.9	0.5	324.05	1.75	128.3	89	0
56	2	fontolizumab	14	70	1mg/kg_0 0.1mg/kg_4,8,12w	iv-sc	4	30	16	-0.35		56 16	9	0.487805	33	9.1	0.37	327.01	2.93	122.4	90	9
56	3	fontolizumab	14	70	1mg/kg_0 1mg/kg_4,8,12w	iv-sc	4	35	16	-0.3		56 16	9	0.475	34.5	10.8	0.28	323.24	2.05	128.7	91	9
56	4	fontolizumab	14	280	4mg/kg_0 0.1mg/kg_4,8,12w	iv-sc	4	32	16	-0.21		56 16	9	0.5	34.5	10	0.4	312.57	1.87	131.5	92	9
56	5	fontolizumab	14	280	4mg/kg_0 1mg/kg_4,8,12w	iv-sc	4	30	16	-0.05		56 16	9	0.425	34	8.4	0.32	329.44	1.57	119.5	93	9
58	1	placebo	1	0			0	138	12	-0.44	3.408	58 12	8	0.42	36.6	6	0.33	329.9	3.08		94	0
58	2	vercirnon	15	250	250mg_qd_12w	po	3	97	12	-0.41	2.65	58 12	8	0.47	37.2	6	0.25	340.1	2.8		95	10
58	3	vercirnon	15	500	250mg_bid_12w	po	3	96	12	-0.14	3.106	58 12	8	0.45	37.3	5	0.37	323.3	2.76		96	10
58	4	vercirnon	15	500	500mg_qd_12w	po	3	94	12	-0.66	3.484	58 12	8	0.51	34.9	6	0.3	332.5	3.03		97	10
61	1	placebo	1	0			0	203	12	-0.186		61 12	8	0.493	36.1	9.5	0.248	313.7	1.22		98	0
61	2	vercirnon	15	500	500mg_qd_12w	po	3	203	12	-0.046		61 12	8	0.36	37	10.7	0.266	314.6	1.35		99	10
61	3	vercirnon	15	1000	500mg_bid_12w	po	3	202	12	0.193		61 12	8	0.475	35.9	10.2	0.248	321.8	1.49		100	10
62	1	placebo	1	0			0	63	8	0.42387	1.6188	62 08	6	0.571	35.1			311.2	2.13		101	0
62	2	laquinimod	16	0.5	0.5mg_qd_8w	po	3	29	8	-0.2565	1.7271	62 08	6	0.448	39.6			288.3	1.71		102	7
62	3	laquinimod	16	1	1.0mg_qd_8w	po	3	30	8	0.66263	1.6683	62 08	6	0.433	38.2			291.9	0.67		103	7
62	4	laquinimod	16	1.5	1.5mg_qd_8w	po	3	29	8	0.45602	1.7365	62 08	6	0.276	40.9			297.8	1.51		104	7
62	5	laquinimod	16	2	2.0mg_qd_8w	po	3	29	8	1.51775	2.6325	62 08	6	0.414	37.4			313.2	0.65		105	7

## Sheet: IBDQ
trialNO	armNO	treatment	FLAG	DOSE	Regimen	method	methodFlag	no	week	ibdq	SD	group week	tp1	male	age	dur	smok	CDAI	CRP	IBDQ	group	CLASS
1	1	placebo	1	0			0	25	4	5		1 04	3	0.6	38.5	10.4		288	1.28	128	1	0
1	2	Infliximab	2	5	5mg/kg_0w	iv	2	27	4	46		1 04	3	0.52	37	12.5		312	2.21	122	2	1
7	1	placebo	1	0			0	170	2	20.1	24.29	7 02	2	0.521	34		38.5	289.9	1	125.3	5	0
7	2	Infliximab	2	5	5mg/kg_0,2,6,14,22	iv	2	169	2	31.4	29.6	7 02	2	0.529	35		35.3	287.2	1	122.1	6	1
7	1	placebo	1	0			0	170	6	28.3	31.25	7 06	4	0.521	34		38.5	289.9	1	125.3	5	0
7	2	Infliximab	2	5	5mg/kg_0,2,6,14,22	iv	2	169	6	39.9	32.9	7 06	4	0.529	35		35.3	287.2	1	122.1	6	1
7	1	placebo	1	0			0	170	10	31	31.66	7 1	6	0.521	34		38.5	289.9	1	125.3	5	0
7	2	Infliximab	2	5	5mg/kg_0,2,6,14,22	iv	2	169	10	42.4	34.67	7 1	6	0.529	35		35.3	287.2	1	122.1	6	1
7	1	placebo	1	0			0	170	18	30.3	33.92	7 18	9	0.521	34		38.5	289.9	1	125.3	5	0
7	2	Infliximab	2	5	5mg/kg_0,2,6,14,22	iv	2	169	18	43.7	34.56	7 18	9	0.529	35		35.3	287.2	1	122.1	6	1
7	1	placebo	1	0			0	170	26	31.4	35.43	7 26	11	0.521	34		38.5	289.9	1	125.3	5	0
7	2	Infliximab	2	5	5mg/kg_0,2,6,14,22	iv	2	169	26	45.2	35.76	7 26	11	0.529	35		35.3	287.2	1	122.1	6	1
9	1	placebo	1	0			0	63	6	15		9 06	4	0.48	34	8.9		300		130	7	0
9	3	natalizumab	3	180	3mg/kg_0,4	iv	2	66	6	27		9 06	4	0.45	36	8.1		300		136	9	2
9	4	natalizumab	3	360	6mg/kg_0,4	iv	2	51	6	32		9 06	4	0.49	35	7.8		298		123	10	2
9	1	placebo	1	0			0	63	12	15		9 12	7	0.48	34	8.9		300		130	7	0
9	3	natalizumab	3	180	3mg/kg_0,4	iv	2	66	12	25		9 12	7	0.45	36	8.1		300		136	9	2
9	4	natalizumab	3	360	6mg/kg_0,4	iv	2	51	12	32		9 12	7	0.49	35	7.8		298		123	10	2
11	1	placebo	1	0			0	232	12	15.2	28.92	11 12	7	0.41	37.7	10.025	0.19	299.5	2.34	122.5	11	0
11	2	natalizumab	3	300	300mg_0,4,8	iv	2	245	12	26.7	32.34	11 12	7	0.41	38.1	10.17	0.22	303.9	2.3	123.6	12	2
16	1	placebo	1	0			0	132	2	10		16 02	2	0.326	37.7	8.4		300	0.75	124	13	0
16	2	CDP571	4	10	10mg/kg_q8w_0-24w	iv	2	263	2	20		16 02	2	0.399	37.9	9.1		293	0.67	129	14	1
16	1	placebo	1	0			0	132	4	14		16 04	3	0.326	37.7	8.4		300	0.75	124	13	0
16	2	CDP571	4	10	10mg/kg_q8w_0-24w	iv	2	263	4	20		16 04	3	0.399	37.9	9.1		293	0.67	129	14	1
16	1	placebo	1	0			0	132	8	15		16 08	5	0.326	37.7	8.4		300	0.75	124	13	0
16	2	CDP571	4	10	10mg/kg_q8w_0-24w	iv	2	263	8	17		16 08	5	0.399	37.9	9.1		293	0.67	129	14	1
16	1	placebo	1	0			0	132	16	14		16 16	8	0.326	37.7	8.4		300	0.75	124	13	0
16	2	CDP571	4	10	10mg/kg_q8w_0-24w	iv	2	263	16	17		16 16	8	0.399	37.9	9.1		293	0.67	129	14	1
16	1	placebo	1	0			0	132	24	14		16 24	10	0.326	37.7	8.4		300	0.75	124	13	0
16	2	CDP571	4	10	10mg/kg_q8w_0-24w	iv	2	263	24	17		16 24	10	0.399	37.9	9.1		293	0.67	129	14	1
16	1	placebo	1	0			0	132	28	14		16 28	12	0.326	37.7	8.4		300	0.75	124	13	0
16	2	CDP571	4	10	10mg/kg_q8w_0-24w	iv	2	263	28	19		16 28	12	0.399	37.9	9.1		293	0.67	129	14	1
17	1	placebo	1	0			0	20	2	9.3		17 02	2	0.5	39.3			266.1		121.4	15	0
17	2	etanercept	5	25	25mg_biw_0-8w	sc	1	23	2	11.5		17 02	2	0.695652	37.4			299.5		124.4	16	1
17	1	placebo	1	0			0	20	4	34.5		17 04	3	0.5	39.3			266.1		121.4	15	0
17	2	etanercept	5	25	25mg_biw_0-8w	sc	1	23	4	11.2		17 04	3	0.695652	37.4			299.5		124.4	16	1
17	1	placebo	1	0			0	20	8	27.8		17 08	5	0.5	39.3			266.1		121.4	15	0
17	2	etanercept	5	25	25mg_biw_0-8w	sc	1	23	8	18.4		17 08	5	0.695652	37.4			299.5		124.4	16	1
23	1	placebo	1	0			0	215	26	20.5	33.1	23 26	11	0.39939	28	8	0.33	284.3	0.902		17	0
23	2	certolizumab	6	400	400mg_0,2,4,q4w_8-26w	sc	1	223	26	26.4	35.1	23 26	11	0.47432	37	7	0.31	284.7	0.82		18	1
26	1	placebo	1	0			0	74	1	15.1		26 01	1	0.5	37		0.38	295.7	1.8	126.9	19	0
26	2	adalimumab	7	40	40mg_0 20mg_2	sc	1	74	1	14		26 01	1	0.527027	39		0.34	298	1.6	129.9	20	1
26	3	adalimumab	7	80	80mg_0 40mg_2	sc	1	75	1	20.3		26 01	1	0.333333	38		0.43	300.7	2	126.9	21	1
26	4	adalimumab	7	160	160mg_0 80mg_2	sc	1	76	1	22.1		26 01	1	0.473684	39		0.42	295.4	1.4	125.1	22	1
26	1	placebo	1	0			0	74	2	19.3		26 02	2	0.5	37		0.38	295.7	1.8	126.9	19	0
26	2	adalimumab	7	40	40mg_0 20mg_2	sc	1	74	2	18.3		26 02	2	0.527027	39		0.34	298	1.6	129.9	20	1
26	3	adalimumab	7	80	80mg_0 40mg_2	sc	1	75	2	27.4		26 02	2	0.333333	38		0.43	300.7	2	126.9	21	1
26	4	adalimumab	7	160	160mg_0 80mg_2	sc	1	76	2	28.2		26 02	2	0.473684	39		0.42	295.4	1.4	125.1	22	1
26	1	placebo	1	0			0	74	4	20.6		26 04	3	0.5	37		0.38	295.7	1.8	126.9	19	0
26	2	adalimumab	7	40	40mg_0 20mg_2	sc	1	74	4	17.3		26 04	3	0.527027	39		0.34	298	1.6	129.9	20	1
26	3	adalimumab	7	80	80mg_0 40mg_2	sc	1	75	4	31.6		26 04	3	0.333333	38		0.43	300.7	2	126.9	21	1
26	4	adalimumab	7	160	160mg_0 80mg_2	sc	1	76	4	33.3		26 04	3	0.473684	39		0.42	295.4	1.4	125.1	22	1
29	1	placebo	1	0			0	166	4	15.1	26.99	29 04	3	0.391566	37		0.34	313	2	124	23	0
29	2	adalimumab	7	160	160mg_0w_80mg_2	sc	1	159	4	30.2	30.75	29 04	3	0.314465	39		0.35	313	1.9	120	24	1
33	1	placebo	1	0			0	58	8	21.7		33 08	5	0.517241	34.5	9.08	0.328	288	2.5	122	25	0
33	2	vedolizumab	8	0.5	0.5mg/kg_q4w_0_4w	iv	2	62	8	26.8		33 08	5	0.403226	36	8.75	0.468	288	1.96	131	26	2
33	3	vedolizumab	8	2	2.0mg/kg_q4w_0_4w	iv	2	65	8	27.5		33 08	5	0.476923	38.5	8	0.415	297	2.46	131	27	2
41	1	placebo	1	0			0	55	4	21	28	41 04	3	0.44	35	11		324	1.8		35	0
41	3	semapimod	10	180	60mg_3d	iv	2	51	4	19	33	41 04	3	0.53	37	10.3		311	3.6		37	1
41	1	placebo	1	0			0	55	8	20	29	41 08	5	0.44	35	11		324	1.8		35	0
41	3	semapimod	10	180	60mg_3d	iv	2	51	8	21	36	41 08	5	0.53	37	10.3		311	3.6		37	1
42	1	placebo	1	0			0	73	4	18.7		42 04	3	0.410959	42.6	11.52	28.8	305			38	0
42	2	apilimod	11	50	50mg_qd	po	3	73	4	17		42 04	3	0.369863	40.6	10.82	35.6	304			39	3
42	3	apilimod	11	100	100mg_qd	po	3	74	4	17		42 04	3	0.405405	41.4	11.35	33.8	300			40	3
42	1	placebo	1	0			0	73	6	23.2		42 06	4	0.410959	42.6	11.52	28.8	305			38	0
42	2	apilimod	11	50	50mg_qd	po	3	73	6	17.7		42 06	4	0.369863	40.6	10.82	35.6	304			39	3
42	3	apilimod	11	100	100mg_qd	po	3	74	6	19.5		42 06	4	0.405405	41.4	11.35	33.8	300			40	3
44	1	placebo	1	0			0	34	4	3.1		44 01	3	0.352941	35.7	8.2	29.4	306.4	1.71		41	0
44	2	tofacitinib	12	1	1mg_bid_4w	po	3	36	4	18		44 01	3	0.694444	38.6	11.1	22.2	300.3	1.83		42	5
44	3	tofacitinib	12	5	5mg_bid_4w	po	3	34	4	17		44 01	3	0.411765	38.7	10.9	32.4	297.7	1.75		43	5
44	4	tofacitinib	12	15	15mg_bid_4w	po	3	35	4	18		44 01	3	0.514286	38.1	11.2	22.9	308	2.61		44	5
45	1	placebo	1	0			0	90	8	26.58	3.76	45 08	5	0.340659	37.2	10.8		313	0.55		45	0
45	2	tofacitinib	12	5	5mg_bid_8w	po	3	85	8	41.2	3.9	45 08	5	0.627907	40.2	11.2		314	0.59		46	5
45	3	tofacitinib	12	10	10mg_bid_8w	po	3	86	8	40.05	3.9	45 08	5	0.453488	39.3	11.3		320	0.55		47	5
46	1	placebo	1	0			0	44	10	17.56	33.73	46 1	6	0.409091	35.1	6.8	27	298.6	1.98		48	0
46	2	filgotinib	13	200	200mg_qd_10w	po	3	128	10	33.82	33.692	46 1	6	0.453846	37.4	8.8	30	291.3	1.42		49	5
49	1	placebo	1	0			0	121	12	13.4	2.798	49 12	7	0.351562	38	9.8		320.7	2.79		50	0
49	2	abatacept	14	3	3mg/kg_0,2,4,8w	iv	2	124	12	7.53	2.765	49 12	7	0.4	36.9	9.2		317.9	2.35		51	7
49	3	abatacept	14	10	10mg/kg_0,2,4,8w	iv	2	116	12	11.1	2.858	49 12	7	0.390625	38.6	9.9		318.9	2.42		52	7
49	4	abatacept	14	30	30mg/kg_0,2w_10mg/kg_4,8w	iv	2	60	12	0.79	3.974	49 12	7	0.415385	36	8.4		320.6	2.93		53	7
50	1	placebo	1	0			0	39	12	7.3		50 12	7	0.589744	35.5		18	295.19	1.4		54	0
50	2	risankizumab	15	200	200mg_q4w_0-8w	iv	2	41	12	21.7		50 12	7	0.634146	38.8		29	310.74	1.1		55	3
50	3	risankizumab	15	600	600mg_q4w_0-8w	iv	2	41	12	34.7		50 12	7	0.609756	39.9		32	297.37	0.8		56	3
54	1	placebo	1	0			0	37	8	16.6	25.38	54 08	5	0.351351	40.5	8.7		276	0.7		57	0
54	2	upadacitinib	16	3	3mg_bid_16w	po	3	39	8	18.9	40.35	54 08	5	0.512821	39.7	10.7		288	0.6		58	5
54	3	upadacitinib	16	6	6mg_bid_16w	po	3	37	8	34.6	36.22	54 08	5	0.432432	40.5	8.8		296	1.17		59	5
54	4	upadacitinib	16	12	12mg_bid_16w	po	3	36	8	24.9	30.95	54 08	5	0.527778	40.8	9.1		280	1.66		60	5
54	5	upadacitinib	16	12	24mg_qd_16w	po	3	35	8	23.3	30.34	54 08	5	0.457143	40.2	10.8		305	0.74		61	5
54	6	upadacitinib	16	24	24mg_bid_16w	po	3	36	8	39.7	40.76	54 08	5	0.305556	42.5	14.1		277.5	0.59		62	5
54	1	placebo	1	0			0	37	16	14.5	29.2	54 16	8	0.351351	40.5	8.7		276	0.7		57	0
54	2	upadacitinib	16	3	3mg_bid_16w	po	3	39	16	24.6	43	54 16	8	0.512821	39.7	10.7		288	0.6		58	5
54	3	upadacitinib	16	6	6mg_bid_16w	po	3	37	16	41.8	47	54 16	8	0.432432	40.5	8.8		296	1.17		59	5
54	4	upadacitinib	16	12	12mg_bid_16w	po	3	36	16	32.1	38.6	54 16	8	0.527778	40.8	9.1		280	1.66		60	5
54	5	upadacitinib	16	12	24mg_qd_16w	po	3	35	16	22.5	27.8	54 16	8	0.457143	40.2	10.8		305	0.74		61	5
54	6	upadacitinib	16	24	24mg_bid_16w	po	3	36	16	44.4	40.1	54 16	8	0.305556	42.5	14.1		277.5	0.59		62	5
56	1	placebo	1	0			0	39	4	16.8	28.4	56 04	3	0.375	36	7.9	50	324.05	1.75	128.3	63	0
56	2	fontolizumab	17	1	1mg/kg_0 0.1mg/kg_4,8,12w	iv-sc	4	35	4	21.7	30.1	56 04	3	0.487805	33	9.1	37	327.01	2.93	122.4	64	9
56	3	fontolizumab	17	2	1mg/kg_0 1mg/kg_4,8,12w	iv-sc	4	38	4	22.7	31.6	56 04	3	0.475	34.5	10.8	28	323.24	2.05	128.7	65	9
56	4	fontolizumab	17	4	4mg/kg_0 0.1mg/kg_4,8,12w	iv-sc	4	38	4	17.9	26.2	56 04	3	0.5	34.5	10	40	312.57	1.87	131.5	66	9
56	5	fontolizumab	17	5	4mg/kg_0 1mg/kg_4,8,12w	iv-sc	4	40	4	15	26.2	56 04	3	0.425	34	8.4	32	329.44	1.57	119.5	67	9
56	1	placebo	1	0			0	38	6	22.6	31.1	56 06	4	0.375	36	7.9	50	324.05	1.75	128.3	63	0
56	2	fontolizumab	17	1	1mg/kg_0 0.1mg/kg_4,8,12w	iv-sc	4	39	6	19.4	32.7	56 06	4	0.487805	33	9.1	37	327.01	2.93	122.4	64	9
56	3	fontolizumab	17	2	1mg/kg_0 1mg/kg_4,8,12w	iv-sc	4	36	6	28.9	31.5	56 06	4	0.475	34.5	10.8	28	323.24	2.05	128.7	65	9
56	4	fontolizumab	17	4	4mg/kg_0 0.1mg/kg_4,8,12w	iv-sc	4	38	6	22	30.9	56 06	4	0.5	34.5	10	40	312.57	1.87	131.5	66	9
56	5	fontolizumab	17	5	4mg/kg_0 1mg/kg_4,8,12w	iv-sc	4	35	6	19.9	30.6	56 06	4	0.425	34	8.4	32	329.44	1.57	119.5	67	9
56	1	placebo	1	0			0	37	8	19.1	29.4	56 08	5	0.375	36	7.9	50	324.05	1.75	128.3	63	0
56	2	fontolizumab	17	1	1mg/kg_0 0.1mg/kg_4,8,12w	iv-sc	4	39	8	20.1	34.8	56 08	5	0.487805	33	9.1	37	327.01	2.93	122.4	64	9
56	3	fontolizumab	17	2	1mg/kg_0 1mg/kg_4,8,12w	iv-sc	4	36	8	29.6	35.6	56 08	5	0.475	34.5	10.8	28	323.24	2.05	128.7	65	9
56	4	fontolizumab	17	4	4mg/kg_0 0.1mg/kg_4,8,12w	iv-sc	4	38	8	25.7	32.5	56 08	5	0.5	34.5	10	40	312.57	1.87	131.5	66	9
56	5	fontolizumab	17	5	4mg/kg_0 1mg/kg_4,8,12w	iv-sc	4	34	8	28.8	32.2	56 08	5	0.425	34	8.4	32	329.44	1.57	119.5	67	9
56	1	placebo	1	0			0	37	12	21.9	30.8	56 12	7	0.375	36	7.9	50	324.05	1.75	128.3	63	0
56	2	fontolizumab	17	1	1mg/kg_0 0.1mg/kg_4,8,12w	iv-sc	4	39	12	21.1	34.9	56 12	7	0.487805	33	9.1	37	327.01	2.93	122.4	64	9
56	3	fontolizumab	17	2	1mg/kg_0 1mg/kg_4,8,12w	iv-sc	4	37	12	29.3	34.7	56 12	7	0.475	34.5	10.8	28	323.24	2.05	128.7	65	9
56	4	fontolizumab	17	4	4mg/kg_0 0.1mg/kg_4,8,12w	iv-sc	4	37	12	25.5	33.5	56 12	7	0.5	34.5	10	40	312.57	1.87	131.5	66	9
56	5	fontolizumab	17	5	4mg/kg_0 1mg/kg_4,8,12w	iv-sc	4	35	12	28.4	33.1	56 12	7	0.425	34	8.4	32	329.44	1.57	119.5	67	9
61	1	placebo	1	0			0	203	8	13.18	23.88	61 08	5	0.493	36.1	9.5	0.248	313.7	1.22		68	0
61	2	Vercirnon	18	500	500mg_qd_12w	po	3	203	8	12.06	23.86	61 08	5	0.36	37	10.7	0.266	314.6	1.35		69	10
61	3	Vercirnon	18	1000	500mg_bid_12w	po	3	202	8	16.55	23.9	61 08	5	0.475	35.9	10.2	0.248	321.8	1.49		70	10
61	1	placebo	1	0			0	203	12	13	26.11	61 12	7	0.493	36.1	9.5	0.248	313.7	1.22		68	0
61	2	Vercirnon	18	500	500mg_qd_12w	po	3	203	12	12.66	26.08	61 12	7	0.36	37	10.7	0.266	314.6	1.35		69	10
61	3	Vercirnon	18	1000	500mg_bid_12w	po	3	202	12	14.86	26.13	61 12	7	0.475	35.9	10.2	0.248	321.8	1.49		70	10
